# Supplementary material for: Artificial intelligence pathway search to resolve catalytic glycerol hydrogenolysis selectivity
Source: Royal Society of Chemistry journal article supplement (doi:10.1039/d2sc02107b), 2022-01-01
Supplement: d2sc02107b2.pdf [file d2sc02107b2.pdf]

## XYZ coordinates for all the structures in Fig. 5

### 1. 1,2-PDO-dehydrogenation path

Str 1

Free energy from VASP is -328.39379400 eV

PBC 10.223900 10.223900 20.000000 90.000000 90.000000

120.000000

|    |             |            |             |
|----|-------------|------------|-------------|
| H  | 2.56691945  | 1.43923141 | 7.25711903  |
| H  | -0.04377945 | 2.94207071 | 7.26393275  |
| H  | 1.94551802  | 5.59350670 | 11.35439436 |
| H  | 1.76263090  | 6.24853554 | 8.99010230  |
| H  | 2.17365364  | 3.79615525 | 9.64350942  |
| H  | 2.56244699  | 7.54714549 | 9.93089289  |
| H  | 3.10591426  | 3.43031148 | 11.13626072 |
| H  | 4.74420331  | 5.94699531 | 11.06855044 |
| H  | 4.19671842  | 5.57640868 | 8.76773784  |
| H  | 4.16467228  | 3.36776412 | 8.77649582  |
| C  | 2.85629577  | 5.54905729 | 10.73368286 |
| C  | 2.67251270  | 6.51886758 | 9.55972649  |
| C  | 3.03096740  | 4.10086297 | 10.26669922 |
| O  | 3.92418748  | 5.94984188 | 11.59620540 |
| O  | 3.83227244  | 6.50257320 | 8.68242509  |
| O  | 4.26507973  | 4.02136705 | 9.50131530  |
| Cu | 5.10835498  | 8.84704951 | 0.00127886  |
| Cu | -2.55543284 | 8.85212949 | 0.00592344  |
| Cu | 0.00152531  | 8.85223995 | 0.00382139  |
| Cu | 2.55532374  | 8.85039728 | 0.00186300  |
| Cu | 8.94196113  | 2.21496390 | 0.00537177  |
| Cu | 1.27766833  | 2.21275799 | 0.01181878  |
| Cu | 3.83527190  | 2.21290275 | 0.00614283  |
| Cu | 6.39109844  | 2.21514433 | 0.00009607  |
| Cu | 7.66517761  | 4.42851017 | 0.00553876  |
| Cu | -0.00407226 | 4.42907591 | 0.00459696  |
| Cu | 2.55961507  | 4.43283322 | 0.00119318  |
| Cu | 5.11424490  | 4.43011061 | 0.00250585  |
| Cu | 6.38824836  | 6.63671419 | 0.00238845  |
| Cu | -1.27942586 | 6.63810758 | 19.99957806 |
| Cu | 1.28003365  | 6.64250111 | 0.00191010  |
| Cu | 3.83422949  | 6.64042098 | 0.00235666  |
| Cu | -0.00423426 | 1.47161580 | 2.07977278  |
| Cu | 2.55589452  | 1.47251059 | 2.08560339  |
| Cu | 5.11418136  | 1.47617222 | 2.08145297  |
| Cu | 7.66551325  | 1.47261319 | 2.08871219  |

|    |             |            |            |
|----|-------------|------------|------------|
| Cu | -1.27891381 | 3.68798736 | 2.08911201 |
| Cu | 1.27788053  | 3.69337579 | 2.07727849 |
| Cu | 3.83334997  | 3.69403090 | 2.09033757 |
| Cu | 6.38841629  | 3.68404943 | 2.09613188 |
| Cu | -2.55303085 | 5.90494884 | 2.09663548 |
| Cu | -0.00047430 | 5.90443256 | 2.08853882 |
| Cu | 2.55339313  | 5.90226380 | 2.09608390 |
| Cu | 5.10910155  | 5.90458536 | 2.09220622 |
| Cu | -3.83943831 | 8.11244607 | 2.09396081 |
| Cu | -1.27932440 | 8.11161499 | 2.08182064 |
| Cu | 1.28246514  | 8.11275440 | 2.09833809 |
| Cu | 3.83285494  | 8.11634263 | 2.09794856 |
| Cu | 1.27193739  | 0.74587709 | 4.17299303 |
| Cu | 3.83142993  | 0.73273696 | 4.15585214 |
| Cu | 6.38460431  | 0.73703332 | 4.16401753 |
| Cu | 8.94420544  | 0.74866030 | 4.17545024 |
| Cu | 0.01492573  | 2.93748268 | 4.15676738 |
| Cu | 2.54133091  | 2.94105598 | 4.16509683 |
| Cu | 5.08758403  | 2.93410405 | 4.17473073 |
| Cu | 7.67532782  | 2.94732979 | 4.17646723 |
| Cu | -1.27503493 | 5.14946691 | 4.17670800 |
| Cu | 1.26190231  | 5.15132609 | 4.17196157 |
| Cu | 3.83398467  | 5.17622035 | 4.18245299 |
| Cu | 6.39091061  | 5.15895545 | 4.15547868 |
| Cu | -2.55990830 | 7.39575798 | 4.17958269 |
| Cu | -0.00770047 | 7.37607806 | 4.16226879 |
| Cu | 2.56593376  | 7.36622985 | 4.19529103 |
| Cu | 5.09781619  | 7.36443810 | 4.19058329 |
| Cu | -1.29035035 | 6.62612545 | 6.24104059 |
| Cu | 3.80857431  | 6.63558855 | 6.39840559 |
| Cu | 2.55384290  | 4.42880453 | 6.20207207 |
| Cu | 1.26352078  | 2.20016581 | 6.38378922 |
| Cu | 1.24265767  | 6.62351804 | 6.22606784 |
| Cu | 7.63890418  | 4.42503411 | 6.24229195 |
| Cu | 8.93798225  | 2.20835420 | 6.29049756 |
| Cu | -0.01321614 | 4.40110437 | 6.29540073 |
| Cu | 3.81436428  | 2.19427375 | 6.29373834 |
| Cu | 5.08698574  | 8.82344876 | 6.21786136 |
| Cu | 7.64714502  | 0.00655731 | 6.23065635 |
| Cu | -2.56704074 | 8.84244127 | 6.28868698 |
| Cu | 6.38916387  | 6.62419146 | 6.23020158 |
| Cu | 0.00252283  | 8.83265511 | 6.23671930 |
| Cu | 5.10719284  | 4.39874502 | 6.21703056 |
| Cu | 6.37317998  | 2.20179951 | 6.24412414 |

Str 2

Free energy from VASP is -327.58519100 eV

| PBC        | 10.223900   | 10.223900  | 20.000000   | 90.000000 | 90.000000 |
|------------|-------------|------------|-------------|-----------|-----------|
| 120.000000 |             |            |             |           |           |
| H          | 3.30190534  | 5.38759710 | 7.41145086  |           |           |
| H          | 3.76140143  | 0.74402440 | 7.22098851  |           |           |
| H          | 2.65013308  | 4.92926800 | 10.06045620 |           |           |
| H          | 3.08275476  | 2.77976466 | 8.87866706  |           |           |
| H          | 0.35818124  | 5.94286582 | 10.01184763 |           |           |
| H          | 2.08284369  | 2.58605063 | 10.34930056 |           |           |
| H          | 0.54015517  | 4.52409100 | 11.08519452 |           |           |
| H          | -0.89270979 | 4.64857732 | 8.63452660  |           |           |
| H          | 1.26135069  | 8.15339895 | 7.23313388  |           |           |
| H          | 0.24590398  | 2.71820186 | 8.78167994  |           |           |
| C          | 1.87306144  | 4.51587383 | 9.38328352  |           |           |
| C          | 2.10330385  | 3.00064485 | 9.32539500  |           |           |
| C          | 0.52090060  | 4.85515480 | 10.03478887 |           |           |
| O          | 1.97586470  | 5.14590281 | 8.10993757  |           |           |
| O          | 1.11501862  | 2.30614816 | 8.52591435  |           |           |
| O          | -0.60041900 | 4.16323298 | 9.44003943  |           |           |
| Cu         | -0.03796015 | 0.00960189 | 19.97395131 |           |           |
| Cu         | 2.51283052  | 0.00703425 | -0.02127472 |           |           |
| Cu         | 5.07269830  | 0.00571981 | 19.98560565 |           |           |
| Cu         | 7.63021066  | 0.00600369 | 19.97743390 |           |           |
| Cu         | -1.31173878 | 2.22242498 | 19.97177770 |           |           |
| Cu         | 1.23442603  | 2.22262780 | -0.01770096 |           |           |
| Cu         | 3.78993313  | 2.22062762 | -0.02431419 |           |           |
| Cu         | 6.35614990  | 2.22681847 | 19.96939389 |           |           |
| Cu         | -2.59408274 | 4.43296857 | 19.97272045 |           |           |
| Cu         | -0.03911178 | 4.42894301 | 19.97153767 |           |           |
| Cu         | 2.51454337  | 4.43198296 | 19.97231212 |           |           |
| Cu         | 5.07459226  | 4.43682499 | 19.97209283 |           |           |
| Cu         | -3.87397023 | 6.64700201 | 19.97624598 |           |           |
| Cu         | -1.32278514 | 6.64297628 | 19.96365952 |           |           |
| Cu         | 1.23766974  | 6.64922356 | 19.97356304 |           |           |
| Cu         | 3.79719204  | 6.64671427 | 19.97360254 |           |           |
| Cu         | -0.03982467 | 1.47774489 | 2.08100951  |           |           |
| Cu         | 2.51189354  | 1.48497714 | 2.06575532  |           |           |
| Cu         | 5.07372493  | 1.49239797 | 2.04749251  |           |           |
| Cu         | 7.62734849  | 1.48374373 | 2.05377377  |           |           |
| Cu         | -1.31253007 | 3.69408476 | 2.06281011  |           |           |
| Cu         | 1.23830940  | 3.69966073 | 2.07176914  |           |           |

|    |             |             |            |
|----|-------------|-------------|------------|
| Cu | 3.78675989  | 3.69278401  | 2.06353643 |
| Cu | 6.34291398  | 3.69680745  | 2.05719604 |
| Cu | -2.60299487 | 5.91187036  | 2.05904565 |
| Cu | -0.04079839 | 5.91258961  | 2.05246425 |
| Cu | 2.51033008  | 5.90816745  | 2.05097370 |
| Cu | 5.06474170  | 5.90762756  | 2.06459517 |
| Cu | -3.87864394 | 8.12805214  | 2.06614226 |
| Cu | -1.32145557 | 8.11478784  | 2.05026011 |
| Cu | 1.23696541  | 8.12456294  | 2.06512847 |
| Cu | 3.79283342  | 8.12679436  | 2.05549702 |
| Cu | 1.24804019  | 0.75237484  | 4.18310221 |
| Cu | 3.81039578  | 0.72554765  | 4.10626873 |
| Cu | 6.33145656  | 0.74660010  | 4.14018272 |
| Cu | 8.87873591  | 0.72771196  | 4.15151844 |
| Cu | -0.02519619 | 2.94358592  | 4.16130176 |
| Cu | 2.49758136  | 2.93594226  | 4.17893084 |
| Cu | 5.05122443  | 2.96058006  | 4.15469309 |
| Cu | 7.62217059  | 2.95991600  | 4.11988455 |
| Cu | -1.32677690 | 5.16936456  | 4.11654997 |
| Cu | 1.22801200  | 5.19561875  | 4.16084027 |
| Cu | 3.76861491  | 5.16018048  | 4.13274283 |
| Cu | 6.32915079  | 5.16802700  | 4.14099871 |
| Cu | -2.60716783 | 7.39209363  | 4.14194939 |
| Cu | -0.04463229 | 7.39135729  | 4.15963200 |
| Cu | 2.50906371  | 7.37344185  | 4.14431756 |
| Cu | 5.06036000  | 7.38140632  | 4.13391620 |
| Cu | 3.80960276  | 2.16315439  | 6.21544372 |
| Cu | -0.09611527 | 4.43052471  | 6.17559159 |
| Cu | 2.53222952  | -0.02578990 | 6.24465327 |
| Cu | 1.19612229  | 6.66611900  | 6.30985006 |
| Cu | 2.50114909  | 4.37148924  | 6.20021301 |
| Cu | 1.18441194  | 2.19020592  | 6.34768148 |
| Cu | 8.86144401  | 2.20792438  | 6.19004992 |
| Cu | 3.81309958  | 6.61232434  | 6.23234225 |
| Cu | -0.06647908 | -0.02548224 | 6.19475013 |
| Cu | -1.35668577 | 6.60012110  | 6.19843633 |
| Cu | 5.03374383  | 4.44215431  | 6.26666822 |
| Cu | -2.62941983 | 4.43257636  | 6.21617932 |
| Cu | 7.61512418  | 0.00112277  | 6.25312771 |
| Cu | -3.88229527 | 6.64531224  | 6.21740021 |
| Cu | 5.06948032  | 0.00265429  | 6.35063611 |
| Cu | 6.35123212  | 2.25710071  | 6.19205854 |

Str 3

Free energy from VASP is -328.72559400 eV

PBC 10.223900 10.223900 20.000000 90.000000 90.000000

120.000000

|    |             |            |             |
|----|-------------|------------|-------------|
| H  | 1.95798150  | 3.80416521 | 8.84076556  |
| H  | -2.62416752 | 7.47263500 | 7.29149189  |
| H  | 0.33431610  | 6.88666390 | 9.50201089  |
| H  | 2.60442763  | 6.56415191 | 8.64313160  |
| H  | -1.26076002 | 5.00507613 | 9.77264483  |
| H  | 2.41202774  | 5.73825932 | 10.22037506 |
| H  | 0.10932251  | 4.92407534 | 10.91419647 |
| H  | -0.28776040 | 3.27527952 | 8.62603433  |
| H  | 5.12712422  | 2.92306713 | 7.22983791  |
| H  | 5.09102123  | 5.92821060 | 7.23214613  |
| C  | 0.58140473  | 5.90262430 | 9.05472003  |
| C  | 2.10027476  | 5.73154773 | 9.16224849  |
| C  | -0.17444798 | 4.83673889 | 9.85424422  |
| O  | 0.18498043  | 5.90124740 | 7.68203921  |
| O  | 2.56920559  | 4.51914033 | 8.52983801  |
| O  | 0.17257956  | 3.49176911 | 9.46915615  |
| Cu | -0.00083907 | 0.00751456 | 19.99872759 |
| Cu | 2.55817110  | 0.00477283 | 19.99726798 |
| Cu | 0.00195778  | 8.85403772 | 19.99597183 |
| Cu | 7.66575330  | 0.00097581 | 19.97696441 |
| Cu | -1.27457727 | 2.21740341 | 19.98838933 |
| Cu | 1.27590160  | 2.21978508 | 19.99341854 |
| Cu | 3.83449653  | 2.21550862 | 19.99117577 |
| Cu | 6.38923679  | 2.21308353 | 19.98427728 |
| Cu | -2.54696658 | 4.42596459 | 19.98551942 |
| Cu | 0.00422366  | 4.43009278 | 0.01134248  |
| Cu | 2.54722942  | 4.42948378 | 0.00157914  |
| Cu | 5.11021346  | 4.42805092 | 19.99683753 |
| Cu | -3.83345302 | 6.64165744 | 0.00816102  |
| Cu | -1.27205498 | 6.64262930 | 0.01450922  |
| Cu | 1.27539750  | 6.64020769 | 0.00542239  |
| Cu | 3.83261868  | 6.64079614 | 19.99542886 |
| Cu | 0.00680039  | 1.49724197 | 2.08369372  |
| Cu | 2.55488012  | 1.49804916 | 2.08404657  |
| Cu | 5.10569575  | 1.48544177 | 2.07074785  |
| Cu | 7.66784221  | 1.48301423 | 2.05889780  |
| Cu | -1.27969774 | 3.70262289 | 2.09675115  |
| Cu | 1.28218223  | 3.69893802 | 2.11061100  |
| Cu | 3.82767908  | 3.69579136 | 2.07456855  |
| Cu | 6.39496144  | 3.69921499 | 2.05745207  |

|    |             |            |            |
|----|-------------|------------|------------|
| Cu | -2.54963057 | 5.90348176 | 2.08720244 |
| Cu | 0.00947304  | 5.90295345 | 2.11342216 |
| Cu | 2.55450640  | 5.90433969 | 2.09436750 |
| Cu | 5.10325637  | 5.90148630 | 2.09038338 |
| Cu | -3.82151969 | 8.12426351 | 2.07218493 |
| Cu | -1.27939953 | 8.12579142 | 2.09313160 |
| Cu | 1.27759183  | 8.12283487 | 2.08558086 |
| Cu | 3.82833709  | 8.11867036 | 2.06425261 |
| Cu | 1.29055161  | 0.74427427 | 4.14786913 |
| Cu | 3.82543065  | 0.75667387 | 4.16641781 |
| Cu | 6.38080040  | 0.76388360 | 4.13981338 |
| Cu | 8.94955300  | 0.75418731 | 4.11634427 |
| Cu | -0.00217788 | 2.99164882 | 4.18232838 |
| Cu | 2.57082182  | 2.97859463 | 4.20778081 |
| Cu | 5.11440190  | 2.98875172 | 4.12759511 |
| Cu | 7.65155823  | 2.96031660 | 4.14828191 |
| Cu | -1.26216003 | 5.20510624 | 4.21600431 |
| Cu | 1.28899490  | 5.17411826 | 4.22720760 |
| Cu | 3.82849652  | 5.15937406 | 4.19575767 |
| Cu | 6.38893838  | 5.18227471 | 4.17056101 |
| Cu | -2.55664906 | 7.37092025 | 4.18200379 |
| Cu | -0.01545508 | 7.38636808 | 4.18327119 |
| Cu | 2.56582738  | 7.37931382 | 4.16848473 |
| Cu | 5.13209634  | 7.39566909 | 4.13219627 |
| Cu | -1.33830958 | 6.70025909 | 6.39623822 |
| Cu | 5.12953376  | 0.04040658 | 6.19471735 |
| Cu | -2.54056085 | 4.40681350 | 6.19892487 |
| Cu | 7.68512576  | 0.04660754 | 6.19006843 |
| Cu | 6.38954673  | 2.23014920 | 6.26987192 |
| Cu | 8.93647992  | 2.21425943 | 6.21579143 |
| Cu | 1.27802025  | 2.19494966 | 6.21260257 |
| Cu | -0.01684564 | 0.04727508 | 6.18988787 |
| Cu | 2.54526225  | 0.02407214 | 6.27558425 |
| Cu | 5.14656533  | 4.43157018 | 6.33694211 |
| Cu | 3.85915674  | 2.21398029 | 6.26462525 |
| Cu | -3.83994533 | 6.66322078 | 6.35587918 |
| Cu | 2.56477076  | 4.42347213 | 6.33786086 |
| Cu | 1.34223575  | 6.72962271 | 6.22597889 |
| Cu | 3.88140559  | 6.68012482 | 6.22668895 |
| Cu | -0.00921655 | 4.36320710 | 6.31476621 |

Str 4

Free energy from VASP is -327.87838600 eV

| PBC        | 10.223900   | 10.223900  | 20.000000   | 90.000000 | 90.000000 |
|------------|-------------|------------|-------------|-----------|-----------|
| 120.000000 |             |            |             |           |           |
| H          | 4.70448742  | 3.52312809 | 7.55213168  |           |           |
| H          | -0.04625857 | 5.96244137 | 7.23162174  |           |           |
| H          | 8.08869235  | 3.46774344 | 8.63399370  |           |           |
| H          | 4.65929514  | 2.28601532 | 10.71904688 |           |           |
| H          | 6.68630411  | 4.06602502 | 10.45716570 |           |           |
| H          | 3.74479079  | 3.53962509 | 9.82585756  |           |           |
| H          | 5.84929249  | 5.10886686 | 9.26946115  |           |           |
| H          | 2.58627828  | 7.39358510 | 7.24573551  |           |           |
| H          | 4.19449428  | 0.93385114 | 8.78449257  |           |           |
| H          | 1.31412574  | 3.64121367 | 7.22999858  |           |           |
| C          | 5.65462011  | 2.94798710 | 8.96354774  |           |           |
| C          | 4.36626666  | 2.64148696 | 9.70785863  |           |           |
| C          | 6.43352882  | 4.18716969 | 9.38375491  |           |           |
| O          | 6.31539057  | 1.96706216 | 8.47937745  |           |           |
| O          | 3.58456068  | 1.65550806 | 9.04831867  |           |           |
| O          | 7.64586036  | 4.34460651 | 8.63946060  |           |           |
| Cu         | 0.00547526  | 0.00177014 | -0.00692873 |           |           |
| Cu         | 2.55323455  | 0.00060536 | -0.00994358 |           |           |
| Cu         | 5.10990123  | 0.00402447 | -0.01203797 |           |           |
| Cu         | 7.67086629  | 0.00335753 | -0.00452647 |           |           |
| Cu         | 8.94772301  | 2.21189688 | -0.00547922 |           |           |
| Cu         | 1.27911009  | 2.21018137 | -0.00608336 |           |           |
| Cu         | 3.83550442  | 2.21318670 | -0.00037978 |           |           |
| Cu         | 6.38942476  | 2.21647555 | -0.00071879 |           |           |
| Cu         | -2.55713659 | 4.43160440 | 0.00176108  |           |           |
| Cu         | -0.00136014 | 4.42772087 | 0.00798191  |           |           |
| Cu         | 2.55958407  | 4.42037547 | -0.00238580 |           |           |
| Cu         | 5.11703183  | 4.42711090 | -0.00005608 |           |           |
| Cu         | 6.39241255  | 6.64319785 | 0.00103304  |           |           |
| Cu         | -1.27931569 | 6.64187617 | 0.00751226  |           |           |
| Cu         | 1.27567092  | 6.64393448 | 0.00327459  |           |           |
| Cu         | 3.84127116  | 6.64384205 | -0.00977776 |           |           |
| Cu         | -0.00212387 | 1.47752412 | 2.07926476  |           |           |
| Cu         | 2.55965207  | 1.47478613 | 2.08010743  |           |           |
| Cu         | 5.11784283  | 1.47703315 | 2.09060621  |           |           |
| Cu         | 7.67013017  | 1.48722992 | 2.09185000  |           |           |
| Cu         | -1.28661271 | 3.68936436 | 2.08780689  |           |           |
| Cu         | 1.28681423  | 3.68851813 | 2.08235452  |           |           |
| Cu         | 3.84510118  | 3.69063626 | 2.09298224  |           |           |
| Cu         | 6.39154835  | 3.68943328 | 2.09849474  |           |           |
| Cu         | -2.55652728 | 5.90303832 | 2.10189372  |           |           |
| Cu         | -0.00768778 | 5.90208169 | 2.09189721  |           |           |

|    |             |            |            |
|----|-------------|------------|------------|
| Cu | 2.56452276  | 5.90141857 | 2.05954883 |
| Cu | 5.11958389  | 5.90013621 | 2.08834667 |
| Cu | -3.83024148 | 8.11806044 | 2.09727785 |
| Cu | -1.27696185 | 8.12930397 | 2.08555609 |
| Cu | 1.27824860  | 8.12911902 | 2.06865912 |
| Cu | 3.83580177  | 8.11702687 | 2.07435348 |
| Cu | 1.27796509  | 0.76559695 | 4.16316395 |
| Cu | 3.83493127  | 0.76671165 | 4.17925564 |
| Cu | 6.41059941  | 0.74457796 | 4.18616367 |
| Cu | 8.95028275  | 0.72810060 | 4.15406040 |
| Cu | 0.00755305  | 2.98136323 | 4.15058465 |
| Cu | 2.57272749  | 2.95762779 | 4.16605182 |
| Cu | 5.12849693  | 2.94449746 | 4.19389384 |
| Cu | 7.65883780  | 2.96763216 | 4.20644904 |
| Cu | -1.26490786 | 5.15086016 | 4.20314505 |
| Cu | 1.29272601  | 5.17819608 | 4.16303748 |
| Cu | 3.82236724  | 5.16980136 | 4.18504272 |
| Cu | 6.38957317  | 5.16382128 | 4.19337745 |
| Cu | -2.53042605 | 7.37612623 | 4.16440208 |
| Cu | 0.01754615  | 7.37993605 | 4.14808905 |
| Cu | 2.53977824  | 7.36836900 | 4.12930076 |
| Cu | 5.10052835  | 7.37654202 | 4.15501569 |
| Cu | 0.03364435  | 0.01502383 | 6.21826484 |
| Cu | -3.83620582 | 6.67191889 | 6.20416184 |
| Cu | 3.83156430  | 6.66062872 | 6.26849233 |
| Cu | 3.85339828  | 2.24191677 | 6.32187148 |
| Cu | 0.02950814  | 4.44232864 | 6.35668544 |
| Cu | -2.55917587 | 4.45064581 | 6.30131661 |
| Cu | 2.55962164  | 0.01241747 | 6.21197180 |
| Cu | 1.27578277  | 2.21960842 | 6.27000929 |
| Cu | -1.24584121 | 2.20186226 | 6.18220926 |
| Cu | 1.28075337  | 6.67659827 | 6.34954562 |
| Cu | 2.56316864  | 4.41746724 | 6.28957575 |
| Cu | 5.09471669  | 0.01662643 | 6.19090197 |
| Cu | 5.09528679  | 4.45024404 | 6.24931767 |
| Cu | 6.45715702  | 2.16218376 | 6.31121650 |
| Cu | -1.26861503 | 6.66626384 | 6.26382046 |
| Cu | 2.59499697  | 8.82309974 | 6.24983617 |

Str 5

Free energy from VASP is -328.29249700 eV

|            |           |           |           |           |           |
|------------|-----------|-----------|-----------|-----------|-----------|
| PBC        | 10.223900 | 10.223900 | 20.000000 | 90.000000 | 90.000000 |
| 120.000000 |           |           |           |           |           |



|    |             |            |             |
|----|-------------|------------|-------------|
| H  | 5.12559278  | 1.38143336 | 7.15529302  |
| H  | 3.81116842  | 3.72948006 | 7.16080245  |
| H  | 7.62525058  | 2.95332233 | 7.17158522  |
| H  | 2.75184695  | 5.76046369 | 9.12590879  |
| H  | 5.03547076  | 6.97423425 | 9.09874131  |
| H  | 2.29010484  | 6.29090968 | 10.76171804 |
| H  | 4.86685909  | 7.58987125 | 10.76144238 |
| H  | 0.05866942  | 2.95263427 | 7.15042649  |
| H  | 0.89955948  | 7.77275640 | 9.07603231  |
| H  | 9.55395389  | 0.77714758 | 9.11798801  |
| C  | 3.12237595  | 7.83785045 | 9.53940228  |
| C  | 2.28506604  | 6.58869473 | 9.69274851  |
| C  | 4.62421074  | 7.80794324 | 9.70077130  |
| O  | 7.68207938  | 0.04579797 | 9.23914248  |
| O  | 0.96569452  | 6.80260085 | 9.23164126  |
| O  | 0.09078908  | 0.17643221 | 9.29210749  |
| Cu | 5.11768591  | 8.83412544 | 19.92276866 |
| Cu | -2.55025140 | 8.83252476 | 19.92229991 |
| Cu | 0.00183923  | 8.83382107 | 19.92113974 |
| Cu | 2.56161316  | 8.83340431 | 19.91608778 |
| Cu | 8.95358157  | 2.19786787 | 19.93612267 |
| Cu | 1.27907093  | 2.19887417 | 19.92868369 |
| Cu | 3.83766705  | 2.19634188 | 19.92863501 |
| Cu | 6.39715931  | 2.19466098 | 19.93216456 |
| Cu | -2.54941843 | 4.41748609 | 19.92532048 |
| Cu | 0.00614669  | 4.41561978 | 19.93826528 |
| Cu | 2.56083423  | 4.41376693 | 19.92652470 |
| Cu | 5.11351413  | 4.41770218 | 19.92659867 |
| Cu | 6.39541510  | 6.62674255 | 19.92146139 |
| Cu | -1.27271596 | 6.62383587 | 19.92597517 |
| Cu | 1.27838330  | 6.62341798 | 19.91293774 |
| Cu | 3.84004917  | 6.62651309 | 19.92228946 |
| Cu | 0.00554125  | 1.45385649 | 2.01584038  |
| Cu | 2.55449897  | 1.45611584 | 2.00612340  |
| Cu | 5.11289854  | 1.45596641 | 2.00782526  |
| Cu | 7.67440838  | 1.45433593 | 2.00737228  |
| Cu | -1.27961103 | 3.67660630 | 2.01434380  |
| Cu | 1.28263569  | 3.67395461 | 2.01988611  |
| Cu | 3.83301586  | 3.66882989 | 2.00969438  |
| Cu | 6.39874900  | 3.67605176 | 2.00334532  |
| Cu | -2.55310098 | 5.88714569 | 2.02638842  |
| Cu | 0.00203523  | 5.89003640 | 2.03355897  |
| Cu | 2.54938486  | 5.89142024 | 2.00511619  |
| Cu | 5.12201636  | 5.89205523 | 2.00757943  |

|    |             |            |            |
|----|-------------|------------|------------|
| Cu | -3.83077641 | 8.10421136 | 2.01943788 |
| Cu | -1.27517907 | 8.09728440 | 2.01620437 |
| Cu | 1.27957547  | 8.09583165 | 2.00512688 |
| Cu | 3.83433098  | 8.10665016 | 2.02013997 |
| Cu | 1.27729506  | 0.73207564 | 4.10885392 |
| Cu | 3.83052182  | 0.74443579 | 4.09245358 |
| Cu | 6.39280910  | 0.72935185 | 4.08216348 |
| Cu | 8.95137923  | 0.74756796 | 4.12841431 |
| Cu | -0.00945152 | 2.93797550 | 4.07020749 |
| Cu | 2.56611153  | 2.92071457 | 4.11231293 |
| Cu | 5.12477120  | 2.93329747 | 4.08580439 |
| Cu | 7.66426612  | 2.92360806 | 4.09220989 |
| Cu | -1.27858300 | 5.12747184 | 4.11521844 |
| Cu | 1.29095603  | 5.13082543 | 4.12161954 |
| Cu | 3.83262045  | 5.14736697 | 4.05628789 |
| Cu | 6.37944711  | 5.13174509 | 4.11652417 |
| Cu | -2.54895086 | 7.36294610 | 4.08403433 |
| Cu | -0.00341852 | 7.37889196 | 4.10830200 |
| Cu | 2.54475428  | 7.36068330 | 4.08162077 |
| Cu | 5.11572237  | 7.36715695 | 4.08493325 |
| Cu | 2.56913712  | 8.81368965 | 6.13913912 |
| Cu | 5.11621026  | 8.82417145 | 6.18868278 |
| Cu | 1.26671336  | 6.62564377 | 6.17611272 |
| Cu | -1.27972689 | 2.22449473 | 6.28372484 |
| Cu | 7.63403084  | 4.41066677 | 6.20463282 |
| Cu | 6.40660953  | 2.17816873 | 6.25978668 |
| Cu | -2.56581678 | 8.83235338 | 6.14938879 |
| Cu | 6.39313277  | 6.62578850 | 6.15731272 |
| Cu | 3.84178224  | 2.20109592 | 6.29075644 |
| Cu | -1.28735782 | 6.61655394 | 6.15356817 |
| Cu | 5.08495986  | 4.44594754 | 6.19997120 |
| Cu | 1.26179702  | 2.19515123 | 6.19410681 |
| Cu | 0.01933635  | 4.41699960 | 6.19929530 |
| Cu | -0.01091295 | 8.83969116 | 6.18044739 |
| Cu | 3.83315804  | 6.64221275 | 6.12618521 |
| Cu | 2.57641832  | 4.42133422 | 6.20154118 |

Str 6

Free energy from VASP is -327.47965900 eV

PBC 10.223900 10.223900 20.000000 90.000000 90.000000

120.000000

|   |             |            |            |
|---|-------------|------------|------------|
| H | -0.09150294 | 5.93329615 | 7.24584539 |
| H | -0.08431180 | 2.94320097 | 7.25350421 |

|    |             |             |             |
|----|-------------|-------------|-------------|
| H  | -1.20228764 | 8.08142100  | 8.39797285  |
| H  | 5.06318333  | 0.30369328  | 9.93548238  |
| H  | 5.06521563  | 3.88791307  | 10.46612051 |
| H  | 3.54482519  | 1.35780214  | 10.03186106 |
| H  | 3.69635221  | 3.78600614  | 9.32549370  |
| H  | 2.60172909  | 2.97378901  | 7.22288401  |
| H  | 6.35137806  | 4.45160494  | 8.54035072  |
| H  | 2.61842520  | 5.93505418  | 7.23281220  |
| C  | 5.25176077  | 2.26358697  | 9.07581404  |
| C  | 4.49178336  | 1.14207505  | 9.53371912  |
| C  | 4.78444649  | 3.67218373  | 9.41682898  |
| O  | 6.38768783  | 2.14361708  | 8.48684595  |
| O  | 3.91787148  | 0.14688297  | 8.04016098  |
| O  | 5.39071295  | 4.66440290  | 8.57483386  |
| Cu | 0.00261958  | -0.00147678 | -0.00280253 |
| Cu | 2.55555773  | -0.00223142 | 0.00178516  |
| Cu | 5.11105538  | 0.00345985  | 0.00349747  |
| Cu | 7.67212194  | 0.00185155  | -0.00441828 |
| Cu | 8.94686445  | 2.20803889  | 0.00462315  |
| Cu | 1.27740668  | 2.20549281  | -0.00239041 |
| Cu | 3.83742930  | 2.21072361  | 0.00463109  |
| Cu | 6.39158763  | 2.21387718  | 0.00237151  |
| Cu | -2.55984458 | 4.42846594  | -0.00836743 |
| Cu | -0.00425613 | 4.43022170  | -0.00367484 |
| Cu | 2.56506416  | 4.42964701  | -0.00314565 |
| Cu | 5.11700608  | 4.42848172  | -0.00969369 |
| Cu | 6.38994431  | 6.64600346  | -0.01908626 |
| Cu | -1.27845414 | 6.64539107  | -0.00426589 |
| Cu | 1.28203586  | 6.64337990  | 0.00000109  |
| Cu | 3.83688562  | 6.64266554  | -0.00806449 |
| Cu | 0.00392857  | 1.47333178  | 2.09559532  |
| Cu | 2.55960312  | 1.47534495  | 2.09001613  |
| Cu | 5.11768141  | 1.48489326  | 2.11071615  |
| Cu | 7.65529134  | 1.47238869  | 2.10128953  |
| Cu | -1.28476410 | 3.68429241  | 2.07130593  |
| Cu | 1.27537636  | 3.69262456  | 2.05389198  |
| Cu | 3.84513628  | 3.68576666  | 2.08537375  |
| Cu | 6.38968411  | 3.68846878  | 2.09591452  |
| Cu | -2.56288042 | 5.91087009  | 2.06957703  |
| Cu | 0.00546257  | 5.91798082  | 2.07767486  |
| Cu | 2.56156171  | 5.90327477  | 2.08678914  |
| Cu | 5.11251064  | 5.90784054  | 2.06890036  |
| Cu | -3.83425772 | 8.12429612  | 2.10365110  |
| Cu | -1.27332900 | 8.12590181  | 2.08994635  |

|    |             |            |            |
|----|-------------|------------|------------|
| Cu | 1.27835687  | 8.13066681 | 2.08822800 |
| Cu | 3.83219147  | 8.12071037 | 2.08097548 |
| Cu | 1.29389580  | 0.76559936 | 4.21004793 |
| Cu | 3.82784506  | 0.75151889 | 4.18506774 |
| Cu | 6.36971684  | 0.75648301 | 4.23529618 |
| Cu | 8.94968507  | 0.74452244 | 4.16012112 |
| Cu | 0.00876051  | 2.97662481 | 4.15297339 |
| Cu | 2.53125023  | 2.98066821 | 4.13607804 |
| Cu | 5.12523880  | 2.96356374 | 4.22572780 |
| Cu | 7.66871020  | 2.93632822 | 4.18453360 |
| Cu | -1.26988041 | 5.16463458 | 4.11954815 |
| Cu | 1.26862561  | 5.15932838 | 4.17153790 |
| Cu | 3.83782605  | 5.15832999 | 4.16928583 |
| Cu | 6.38041731  | 5.18161256 | 4.14931583 |
| Cu | -2.53221682 | 7.39447881 | 4.16976744 |
| Cu | 0.02181565  | 7.39470601 | 4.18665355 |
| Cu | 2.53151403  | 7.37473595 | 4.15782066 |
| Cu | 5.08789488  | 7.37909990 | 4.15677759 |
| Cu | -0.00674427 | 8.88539950 | 6.28537627 |
| Cu | -1.25459308 | 2.21098146 | 6.24486148 |
| Cu | -3.82954084 | 6.67923177 | 6.19245482 |
| Cu | 5.14184017  | 4.48787807 | 6.28954079 |
| Cu | 6.40902237  | 2.23033421 | 6.38490693 |
| Cu | 7.67668450  | 0.01124718 | 6.21121856 |
| Cu | 7.65143505  | 4.44953050 | 6.15594738 |
| Cu | -0.06026811 | 4.43274974 | 6.34616047 |
| Cu | 3.78240843  | 2.28704720 | 6.19025334 |
| Cu | 2.56797814  | 4.45773079 | 6.30904526 |
| Cu | 2.53339232  | 0.00595884 | 6.30429867 |
| Cu | 1.25681971  | 2.25769953 | 6.35211554 |
| Cu | 5.10902071  | 8.84720157 | 6.21669166 |
| Cu | 1.26935249  | 6.63262982 | 6.36045195 |
| Cu | 3.81748361  | 6.67754186 | 6.25315380 |
| Cu | -1.28493649 | 6.61309871 | 6.22801502 |

Str 7

Free energy from VASP is -328.71743700 eV

|            |            |            |            |           |           |
|------------|------------|------------|------------|-----------|-----------|
| PBC        | 10.223900  | 10.223900  | 20.000000  | 90.000000 | 90.000000 |
| 120.000000 |            |            |            |           |           |
| H          | 3.97089555 | 5.14059468 | 7.30354425 |           |           |
| H          | 1.23690709 | 5.25246479 | 7.26104256 |           |           |
| H          | 3.76833760 | 8.18945081 | 8.58817377 |           |           |
| H          | 7.46500859 | 1.72760430 | 8.49952201 |           |           |

|    |             |            |             |
|----|-------------|------------|-------------|
| H  | 3.98883896  | 3.00594223 | 9.28692408  |
| H  | 6.51612955  | 3.23050117 | 8.92869875  |
| H  | 4.66232066  | 2.14095193 | 10.68669543 |
| H  | -0.09329412 | 2.89827141 | 7.24056124  |
| H  | 3.42080928  | 0.31721789 | 9.31266690  |
| H  | 2.61154240  | 2.85871398 | 7.22448621  |
| C  | 5.37037561  | 1.42836956 | 8.80343471  |
| C  | 6.49462247  | 2.23779628 | 8.46715660  |
| C  | 4.25532395  | 2.00261358 | 9.66412981  |
| O  | 5.20562664  | 0.21176320 | 8.42933991  |
| O  | 3.81158733  | 8.22163824 | 7.61682634  |
| O  | 3.11058860  | 1.17440011 | 9.68580713  |
| Cu | 5.11271174  | 8.84989699 | 19.99434893 |
| Cu | -2.55615163 | 8.85217081 | 19.99365316 |
| Cu | -0.00122542 | 8.85380034 | 19.99797080 |
| Cu | 2.55325385  | 8.85267969 | 19.99941215 |
| Cu | 8.94480114  | 2.21346790 | 19.99971791 |
| Cu | 1.27976468  | 2.20653296 | 0.00364696  |
| Cu | 3.83195715  | 2.20923728 | 0.01931793  |
| Cu | 6.38623954  | 2.21121059 | 19.99153002 |
| Cu | 7.66554571  | 4.42993651 | 19.98127102 |
| Cu | -0.00300126 | 4.43181679 | 0.00221403  |
| Cu | 2.55992097  | 4.42996226 | 0.00378593  |
| Cu | 5.11165663  | 4.42968681 | 19.99159007 |
| Cu | -3.83370562 | 6.64376195 | 19.98760728 |
| Cu | -1.27828330 | 6.64447968 | 19.99224695 |
| Cu | 1.27540435  | 6.64391680 | 0.00351722  |
| Cu | 3.83538322  | 6.64284845 | 19.99680503 |
| Cu | -0.00854448 | 1.47252572 | 2.08362759  |
| Cu | 2.55321127  | 1.46965611 | 2.10777199  |
| Cu | 5.12496544  | 1.47284595 | 2.10015243  |
| Cu | 7.65464394  | 1.47058919 | 2.09523122  |
| Cu | -1.28731610 | 3.68612319 | 2.07378014  |
| Cu | 1.27746275  | 3.69136587 | 2.06077496  |
| Cu | 3.83954174  | 3.69305267 | 2.09318575  |
| Cu | 6.38924658  | 3.68649322 | 2.06713748  |
| Cu | -2.54896795 | 5.89548567 | 2.07022137  |
| Cu | 0.00629170  | 5.91285403 | 2.09503667  |
| Cu | 2.54993937  | 5.91283458 | 2.08570024  |
| Cu | 5.10512160  | 5.90506773 | 2.07761285  |
| Cu | -3.84097157 | 8.12314578 | 2.08314178  |
| Cu | -1.27079260 | 8.12036921 | 2.07925467  |
| Cu | 1.27924679  | 8.12769615 | 2.11070275  |
| Cu | 3.82802069  | 8.12025767 | 2.08546363  |

|    |             |            |            |
|----|-------------|------------|------------|
| Cu | 1.25780533  | 0.75254319 | 4.20556972 |
| Cu | 3.85165417  | 0.74006577 | 4.17353474 |
| Cu | 6.37904072  | 0.75758921 | 4.27191769 |
| Cu | 8.93576449  | 0.74051813 | 4.18188373 |
| Cu | 0.01268819  | 2.96299115 | 4.13359289 |
| Cu | 2.53512180  | 2.97751554 | 4.15672095 |
| Cu | 5.11286192  | 2.95874775 | 4.18509913 |
| Cu | 7.65219369  | 2.94210575 | 4.17011955 |
| Cu | -1.25028439 | 5.15037843 | 4.15979663 |
| Cu | 1.29001601  | 5.14066335 | 4.16805125 |
| Cu | 3.80786575  | 5.17513299 | 4.18378753 |
| Cu | 6.37431643  | 5.16210864 | 4.12980791 |
| Cu | -2.55477947 | 7.38165454 | 4.11460844 |
| Cu | 0.01070021  | 7.39887899 | 4.19006361 |
| Cu | 2.55834210  | 7.37406797 | 4.20430356 |
| Cu | 5.08435642  | 7.38386344 | 4.17791712 |
| Cu | 3.86141844  | 6.58498743 | 6.35585537 |
| Cu | 2.58693096  | 4.43407837 | 6.49140001 |
| Cu | -1.30294091 | 6.63169489 | 6.20326265 |
| Cu | 6.38437537  | 2.30493217 | 6.36612273 |
| Cu | 5.13423283  | 4.46762717 | 6.24161592 |
| Cu | -2.54456155 | 8.82737059 | 6.19932833 |
| Cu | 7.61141895  | 0.02740037 | 6.25196317 |
| Cu | 1.27894977  | 2.22160728 | 6.35730737 |
| Cu | 0.08316247  | 0.02081828 | 6.29409767 |
| Cu | -2.55796136 | 4.46787002 | 6.18765225 |
| Cu | -3.78523688 | 6.64659270 | 6.17741572 |
| Cu | -0.00650817 | 4.42953101 | 6.36592042 |
| Cu | -0.02254056 | 8.81808419 | 6.35329289 |
| Cu | 1.23867959  | 6.59571151 | 6.22238318 |
| Cu | -1.25306059 | 2.26204476 | 6.19419670 |
| Cu | 3.79100296  | 2.21349219 | 6.18058167 |

Str 8

Free energy from VASP is -328.29178600 eV

|     |            |           |           |           |           |
|-----|------------|-----------|-----------|-----------|-----------|
| PBC | 10.223900  | 10.223900 | 20.000000 | 90.000000 | 90.000000 |
|     | 120.000000 |           |           |           |           |

|   |             |            |            |
|---|-------------|------------|------------|
| H | -1.05070048 | 5.03786742 | 7.51504762 |
| H | 3.90490625  | 0.72856182 | 7.23652161 |
| H | 4.94051142  | 7.15392666 | 8.51457439 |
| H | -1.18252420 | 6.04509757 | 9.23814093 |
| H | 1.60465969  | 3.59802680 | 9.54640933 |
| H | -0.70957008 | 4.30448509 | 9.68722975 |

|    |             |             |             |
|----|-------------|-------------|-------------|
| H  | 2.44218048  | 4.97227952  | 10.31474502 |
| H  | 1.20805112  | 0.72896665  | 7.23306137  |
| H  | 3.70524693  | 5.25189514  | 8.43839284  |
| H  | 6.40305428  | 3.63804702  | 7.23577065  |
| C  | 0.88967231  | 5.56629023  | 8.95497774  |
| C  | -0.45195817 | 5.23687023  | 9.18292268  |
| C  | 1.99937946  | 4.60853214  | 9.37089367  |
| O  | 1.25404758  | 6.65457905  | 8.35929734  |
| O  | 4.92713426  | 6.36831545  | 7.93571572  |
| O  | 3.04500106  | 4.49155308  | 8.39002924  |
| Cu | 0.00451295  | -0.00804338 | -0.00064881 |
| Cu | 2.56380279  | -0.00751151 | 0.00863816  |
| Cu | 5.11540108  | -0.01356778 | 0.00564514  |
| Cu | 7.66682070  | -0.01149883 | -0.01421766 |
| Cu | 8.94765330  | 2.21215645  | -0.01567939 |
| Cu | 1.28005469  | 2.21426364  | -0.00712915 |
| Cu | 3.83993939  | 2.20977812  | -0.01594652 |
| Cu | 6.39518765  | 2.21372811  | -0.01813245 |
| Cu | -2.55153164 | 4.42467556  | -0.00053980 |
| Cu | 0.00543965  | 4.42735915  | 0.00103992  |
| Cu | 2.55556893  | 4.42923190  | -0.00637581 |
| Cu | 5.11701055  | 4.42339370  | -0.00640667 |
| Cu | 6.39383974  | 6.63537492  | -0.00213179 |
| Cu | -1.26822861 | 6.63421046  | 0.00777437  |
| Cu | 1.28361109  | 6.63443554  | 0.01774344  |
| Cu | 3.83096927  | 6.63304159  | -0.00051272 |
| Cu | 0.00530028  | 1.47596051  | 2.06555541  |
| Cu | 2.56318843  | 1.48572000  | 2.06995781  |
| Cu | 5.11567057  | 1.46274033  | 2.05909912  |
| Cu | 7.66996867  | 1.46410097  | 2.06334020  |
| Cu | -1.26541014 | 3.68554433  | 2.07270710  |
| Cu | 1.28989824  | 3.69078265  | 2.10115398  |
| Cu | 3.82926651  | 3.69113663  | 2.07494229  |
| Cu | 6.39210855  | 3.68914873  | 2.07358782  |
| Cu | -2.54494008 | 5.90715736  | 2.09844084  |
| Cu | 0.01262717  | 5.89180411  | 2.12056001  |
| Cu | 2.55931791  | 5.88981999  | 2.11625838  |
| Cu | 5.11258821  | 5.89385853  | 2.08981407  |
| Cu | -3.82655960 | 8.09812503  | 2.08380138  |
| Cu | -1.27317242 | 8.09467236  | 2.10909242  |
| Cu | 1.28856602  | 8.10633058  | 2.11080908  |
| Cu | 3.82982559  | 8.10238618  | 2.08286488  |
| Cu | 1.30286996  | 0.73121141  | 4.11618849  |
| Cu | 3.82415241  | 0.71992509  | 4.13022827  |

|    |             |             |            |
|----|-------------|-------------|------------|
| Cu | 6.37627227  | 0.74821466  | 4.16801631 |
| Cu | 8.96049166  | 0.72552054  | 4.12778170 |
| Cu | 0.01445129  | 2.94690356  | 4.16167307 |
| Cu | 2.56543367  | 2.94690248  | 4.21091664 |
| Cu | 5.10848314  | 2.92986378  | 4.12347625 |
| Cu | 7.67280798  | 2.95173854  | 4.13236325 |
| Cu | -1.28360554 | 5.14415903  | 4.16890522 |
| Cu | 1.29510071  | 5.16381562  | 4.25014660 |
| Cu | 3.85412437  | 5.14791933  | 4.21380007 |
| Cu | 6.41048235  | 5.17510121  | 4.17141751 |
| Cu | -2.57145519 | 7.38148605  | 4.25883072 |
| Cu | 0.01456329  | 7.35973287  | 4.21297811 |
| Cu | 2.56370833  | 7.34570515  | 4.21491100 |
| Cu | 5.11986295  | 7.36975440  | 4.17825744 |
| Cu | 7.67546113  | 0.03857943  | 6.17984920 |
| Cu | 1.25565949  | 2.19438892  | 6.25712492 |
| Cu | 3.83981764  | 6.69014910  | 6.26328972 |
| Cu | -2.55041459 | 8.85741420  | 6.37790442 |
| Cu | -2.51386450 | 4.40006840  | 6.36922375 |
| Cu | -0.02716853 | 4.38359815  | 6.26698606 |
| Cu | 1.29439075  | 6.68610342  | 6.35268167 |
| Cu | 2.57709426  | 4.37474215  | 6.31183910 |
| Cu | 3.86658557  | 2.16187712  | 6.24009506 |
| Cu | 5.17986815  | 4.33349990  | 6.19072750 |
| Cu | 8.94378381  | 2.18679278  | 6.19099118 |
| Cu | 0.01911408  | 0.04231120  | 6.20883239 |
| Cu | 6.42900322  | 2.20157597  | 6.27387516 |
| Cu | -1.30335868 | 6.57698076  | 6.25813510 |
| Cu | 5.09749712  | -0.00280983 | 6.24855103 |
| Cu | 6.37799812  | 6.62429663  | 6.35999597 |

Str 9

Free energy from VASP is -329.15574200 eV

PBC 10.223900 10.223900 20.000000 90.000000 90.000000

120.000000

|   |             |            |             |
|---|-------------|------------|-------------|
| H | -0.90776782 | 4.60168360 | 9.10944953  |
| H | 3.89770044  | 0.72511291 | 7.22735373  |
| H | 4.93156353  | 7.23392914 | 8.54682965  |
| H | -0.97657910 | 6.09890028 | 10.05824758 |
| H | 1.69619976  | 3.55271157 | 9.52802757  |
| H | -0.30235777 | 4.57915621 | 10.78106084 |
| H | 2.54094813  | 4.78836552 | 10.47871823 |
| H | 1.17988631  | 0.73043824 | 7.23751478  |



|    |             |            |             |
|----|-------------|------------|-------------|
| H  | 3.75177461  | 5.38058927 | 8.51683268  |
| H  | 6.40532776  | 3.65504590 | 7.19102976  |
| C  | 0.94538396  | 5.54670819 | 9.26803744  |
| C  | -0.37820670 | 5.19932346 | 9.87945341  |
| C  | 2.10124188  | 4.57831802 | 9.48231605  |
| O  | 1.07332129  | 6.54037274 | 8.54036208  |
| O  | 4.89555443  | 6.41995238 | 8.00938154  |
| O  | 3.08626684  | 4.60571241 | 8.46902508  |
| Cu | 5.11307489  | 8.84448603 | 19.98362139 |
| Cu | -2.55303669 | 8.84890872 | 0.00505904  |
| Cu | 0.00031712  | 8.83977998 | 0.00104402  |
| Cu | 2.54933468  | 8.84041438 | 19.97207249 |
| Cu | 8.94253131  | 2.21195788 | 19.95457672 |
| Cu | 1.27734488  | 2.21405131 | 19.97692450 |
| Cu | 3.83481424  | 2.21207933 | 19.97835796 |
| Cu | 6.38858013  | 2.21260178 | 19.95789225 |
| Cu | 7.66656600  | 4.42749257 | 19.96812487 |
| Cu | 0.00420461  | 4.42997812 | 19.97995695 |
| Cu | 2.55274504  | 4.43227830 | 19.98642195 |
| Cu | 5.10881072  | 4.42744132 | 19.97694889 |
| Cu | 6.38867527  | 6.63627069 | 19.98474733 |
| Cu | -1.27101514 | 6.63506875 | 19.99367021 |
| Cu | 1.27955484  | 6.63502631 | 0.00704014  |
| Cu | 3.82651614  | 6.63374391 | 19.98709502 |
| Cu | -0.00613955 | 1.47010601 | 2.03930833  |
| Cu | 2.55618551  | 1.48776996 | 2.06228466  |
| Cu | 5.10766910  | 1.46253807 | 2.04726948  |
| Cu | 7.66034979  | 1.46161721 | 2.03621732  |
| Cu | -1.27573662 | 3.68677822 | 2.03732735  |
| Cu | 1.28287727  | 3.68929118 | 2.07989974  |
| Cu | 3.82066593  | 3.69326268 | 2.07133266  |
| Cu | 6.38028345  | 3.69059758 | 2.04271302  |
| Cu | -2.55720009 | 5.90765412 | 2.07181997  |
| Cu | 0.00504869  | 5.89145919 | 2.10107501  |
| Cu | 2.55713865  | 5.89464573 | 2.10569516  |
| Cu | 5.09926638  | 5.89818303 | 2.07582715  |
| Cu | -3.83959657 | 8.10043416 | 2.07684278  |
| Cu | -1.28148869 | 8.09312309 | 2.10136743  |
| Cu | 1.28406766  | 8.10241904 | 2.10576206  |
| Cu | 3.82326600  | 8.10330487 | 2.07309089  |
| Cu | 1.28632809  | 0.73572711 | 4.11226005  |
| Cu | 3.81102282  | 0.72012111 | 4.12305410  |
| Cu | 6.36777026  | 0.74351511 | 4.15503869  |
| Cu | 8.94471742  | 0.72498973 | 4.11454550  |

|    |             |            |            |
|----|-------------|------------|------------|
| Cu | -0.00162147 | 2.93361224 | 4.11681402 |
| Cu | 2.54978259  | 2.94845983 | 4.21034552 |
| Cu | 5.09668723  | 2.92651949 | 4.10884063 |
| Cu | 7.65461064  | 2.94234317 | 4.08553669 |
| Cu | -1.30366973 | 5.14599134 | 4.13931065 |
| Cu | 1.29766801  | 5.15968354 | 4.19883337 |
| Cu | 3.83995073  | 5.15174566 | 4.21623693 |
| Cu | 6.38220109  | 5.17625255 | 4.13857425 |
| Cu | -2.59211709 | 7.38453486 | 4.23597109 |
| Cu | 0.00624674  | 7.35985179 | 4.19123110 |
| Cu | 2.56329337  | 7.34497228 | 4.21715583 |
| Cu | 5.10628300  | 7.37005573 | 4.18150400 |
| Cu | 7.65722499  | 0.02304614 | 6.18084014 |
| Cu | 1.23703777  | 2.20539947 | 6.26321497 |
| Cu | 3.83429041  | 6.68692953 | 6.28909811 |
| Cu | 2.54104579  | 0.00701686 | 6.37692132 |
| Cu | 7.67272537  | 4.39585912 | 6.24581008 |
| Cu | -0.02214112 | 4.39416206 | 6.16383394 |
| Cu | 1.26254558  | 6.63466938 | 6.32821129 |
| Cu | 2.56784733  | 4.38789921 | 6.32898946 |
| Cu | 3.84920464  | 2.16124441 | 6.23372439 |
| Cu | 5.15174651  | 4.33511151 | 6.18206423 |
| Cu | 8.92975945  | 2.21109165 | 6.16835487 |
| Cu | -0.00003161 | 0.04842260 | 6.20257152 |
| Cu | 6.41366710  | 2.19484645 | 6.25341986 |
| Cu | -1.30989502 | 6.59356745 | 6.20951038 |
| Cu | -0.02207716 | 8.84131005 | 6.23782666 |
| Cu | 6.37413900  | 6.61403501 | 6.36074470 |

Str 10

Free energy from VASP is -328.46583600 eV

PBC 10.223900 10.223900 20.000000 90.000000 90.000000

120.000000

|   |             |            |             |
|---|-------------|------------|-------------|
| H | 4.27914869  | 0.04978899 | 8.66512204  |
| H | 2.70614254  | 1.23042375 | 8.67209591  |
| H | 0.56091382  | 7.98529710 | 7.62528845  |
| H | -0.74094936 | 4.17091971 | 9.05066694  |
| H | 0.91461085  | 6.65871017 | 9.80228751  |
| H | -2.12282146 | 4.49006038 | 10.10502622 |
| H | -0.29910115 | 7.47700148 | 10.79426066 |
| H | -0.43774072 | 4.70211891 | 10.73283751 |
| H | 1.23525359  | 5.17303004 | 7.25434850  |
| H | 3.85293567  | 3.76222003 | 7.25331846  |

|    |             |            |             |
|----|-------------|------------|-------------|
| C  | -1.12517934 | 6.20963799 | 9.30568764  |
| C  | -1.10390743 | 4.82219159 | 9.87011597  |
| C  | -0.05379752 | 7.18716588 | 9.75185291  |
| O  | -1.97097059 | 6.53744642 | 8.46355503  |
| O  | 3.35048466  | 0.81706087 | 8.06883691  |
| O  | 0.10001885  | 8.33984945 | 8.95049846  |
| Cu | -0.00020433 | 0.00445074 | -0.01854099 |
| Cu | 2.55288266  | 0.00172907 | -0.00514296 |
| Cu | 5.10727743  | 0.00159146 | -0.01389067 |
| Cu | 7.66874039  | 0.00488774 | -0.02285687 |
| Cu | 8.94732111  | 2.21422555 | -0.02802259 |
| Cu | 1.27436352  | 2.20943187 | -0.01184703 |
| Cu | 3.83117450  | 2.21544586 | -0.00483992 |
| Cu | 6.39017273  | 2.21896994 | -0.02281508 |
| Cu | -2.55839261 | 4.43327087 | -0.01207279 |
| Cu | -0.00250554 | 4.42763226 | -0.01381508 |
| Cu | 2.55587875  | 4.42812882 | -0.00275082 |
| Cu | 5.11255353  | 4.42851898 | -0.00636456 |
| Cu | 6.39409817  | 6.64392698 | -0.01059891 |
| Cu | -1.28569389 | 6.64305942 | -0.00237249 |
| Cu | 1.27360064  | 6.64227817 | -0.01412208 |
| Cu | 3.83731466  | 6.64622897 | -0.01581707 |
| Cu | 0.00032011  | 1.47803448 | 2.07520094  |
| Cu | 2.55474999  | 1.48114522 | 2.08716016  |
| Cu | 5.10407360  | 1.47912368 | 2.06258427  |
| Cu | 7.67095086  | 1.48344650 | 2.04800594  |
| Cu | -1.28287386 | 3.69769298 | 2.06283689  |
| Cu | 1.28074555  | 3.69119931 | 2.06828570  |
| Cu | 3.83082148  | 3.69045691 | 2.08711348  |
| Cu | 6.38316181  | 3.69154229 | 2.07593553  |
| Cu | -2.56196303 | 5.91107324 | 2.09806644  |
| Cu | -0.00140040 | 5.89911659 | 2.06528933  |
| Cu | 2.55632945  | 5.91087394 | 2.05550515  |
| Cu | 5.10785173  | 5.90843957 | 2.06796601  |
| Cu | -3.83529539 | 8.11920099 | 2.07755998  |
| Cu | -1.28179626 | 8.12812763 | 2.08659416  |
| Cu | 1.27477356  | 8.11685211 | 2.06358578  |
| Cu | 3.82777172  | 8.11931269 | 2.06582223  |
| Cu | 1.28930784  | 0.73520965 | 4.16407908  |
| Cu | 3.83055405  | 0.76542020 | 4.20299554  |
| Cu | 6.39774136  | 0.75092913 | 4.10125825  |
| Cu | 8.93781729  | 0.74281942 | 4.13979683  |
| Cu | -0.00045744 | 2.97464353 | 4.13444096  |
| Cu | 2.56008352  | 2.96394229 | 4.19051908  |

|    |             |            |            |
|----|-------------|------------|------------|
| Cu | 5.09257626  | 2.94097313 | 4.17253080 |
| Cu | 7.66884427  | 2.96118001 | 4.12593794 |
| Cu | -1.27160574 | 5.17682326 | 4.16413966 |
| Cu | 1.29951032  | 5.17263962 | 4.14685736 |
| Cu | 3.81541043  | 5.17206324 | 4.15301973 |
| Cu | 6.36187992  | 5.16043589 | 4.16387408 |
| Cu | -2.55299670 | 7.41049062 | 4.18842474 |
| Cu | -0.00504022 | 7.35399069 | 4.13828697 |
| Cu | 2.53654943  | 7.37431681 | 4.15894407 |
| Cu | 5.10470752  | 7.38445331 | 4.13429974 |
| Cu | 7.65964870  | 4.41904891 | 6.19374089 |
| Cu | -1.30495264 | 6.65586469 | 6.23809302 |
| Cu | 1.27339369  | 6.67127916 | 6.35995325 |
| Cu | 6.35302141  | 6.64255731 | 6.19803321 |
| Cu | 0.09316573  | 8.82597545 | 6.12773937 |
| Cu | 3.84361864  | 6.67353687 | 6.20233444 |
| Cu | 0.01651115  | 4.43510228 | 6.23768486 |
| Cu | 2.57288528  | 8.86399630 | 6.23862670 |
| Cu | 8.94026474  | 2.22873983 | 6.21125730 |
| Cu | 3.85597175  | 2.22077645 | 6.40467686 |
| Cu | 1.22263886  | 2.21846336 | 6.18012693 |
| Cu | 2.54675238  | 4.45157136 | 6.35594776 |
| Cu | 6.42220858  | 2.21484652 | 6.18838964 |
| Cu | 2.52723094  | 0.02794264 | 6.31988746 |
| Cu | 5.10125688  | 4.42958294 | 6.27193057 |
| Cu | 10.20417247 | 0.00963698 | 6.21553180 |

Str 11

Free energy from VASP is -329.33652400 eV

|            |           |           |           |           |           |
|------------|-----------|-----------|-----------|-----------|-----------|
| PBC        | 10.223900 | 10.223900 | 20.000000 | 90.000000 | 90.000000 |
| 120.000000 |           |           |           |           |           |

|   |             |            |             |
|---|-------------|------------|-------------|
| H | 0.48144140  | 5.44245951 | 8.89074866  |
| H | 1.53457346  | 7.34810138 | 8.73071815  |
| H | 2.49382683  | 1.38666212 | 9.21684665  |
| H | 1.84820489  | 1.58273498 | 10.85153768 |
| H | 0.01778970  | 3.59155960 | 10.39812051 |
| H | 3.53800154  | 2.10693704 | 10.48329657 |
| H | 0.15841927  | 2.56101731 | 8.95965733  |
| H | 2.12750041  | 6.12193421 | 9.50578746  |
| H | 5.11339663  | 2.94442185 | 7.14868615  |
| H | -1.28673274 | 8.12524452 | 7.16029748  |
| C | 2.01365320  | 3.39805065 | 9.68485287  |
| C | 2.51205401  | 2.04457898 | 10.10457627 |

|    |             |            |             |
|----|-------------|------------|-------------|
| C  | 0.51403475  | 3.50159178 | 9.41018632  |
| O  | 2.76464543  | 4.36818932 | 9.56736278  |
| O  | 1.35548680  | 6.74004928 | 9.47658398  |
| O  | 0.11577247  | 4.56137542 | 8.55360576  |
| Cu | 5.11000959  | 8.85408135 | 19.91030675 |
| Cu | -2.55720875 | 8.84742076 | 19.91032729 |
| Cu | 0.00097116  | 8.84320380 | 19.91009022 |
| Cu | 2.56082529  | 8.85193924 | 19.91256686 |
| Cu | 8.94833145  | 2.20837755 | 19.93067884 |
| Cu | 1.27133208  | 2.21033400 | 19.91387006 |
| Cu | 3.83404722  | 2.21075852 | 19.91017831 |
| Cu | 6.39633246  | 2.20894610 | 19.91167225 |
| Cu | -2.54772319 | 4.41914525 | 19.91243168 |
| Cu | -0.00029904 | 4.42013903 | 19.92372065 |
| Cu | 2.55126851  | 4.42542955 | 19.91103192 |
| Cu | 5.11207443  | 4.42242362 | 19.91126546 |
| Cu | 6.38999883  | 6.63445416 | 19.91076987 |
| Cu | -1.27465202 | 6.63245208 | 19.92407806 |
| Cu | 1.27839908  | 6.63155337 | 19.92163459 |
| Cu | 3.83386179  | 6.63534089 | 19.91259052 |
| Cu | 0.00348913  | 1.47810000 | 2.02008485  |
| Cu | 2.55323090  | 1.47112510 | 1.98826866  |
| Cu | 5.11509622  | 1.46598494 | 1.98018673  |
| Cu | 7.66417613  | 1.46929837 | 2.01177868  |
| Cu | -1.27804974 | 3.68880795 | 2.02857819  |
| Cu | 1.27929071  | 3.68325943 | 2.01195264  |
| Cu | 3.83044566  | 3.68541630 | 1.98455124  |
| Cu | 6.39614343  | 3.68519303 | 1.98724246  |
| Cu | -2.55057122 | 5.88643491 | 2.00841439  |
| Cu | -0.00119422 | 5.89173682 | 2.01069705  |
| Cu | 2.55352430  | 5.89345685 | 2.01065918  |
| Cu | 5.11544505  | 5.89742605 | 1.99521871  |
| Cu | -3.83554410 | 8.10940295 | 1.98559416  |
| Cu | -1.27909621 | 8.11429792 | 1.99434567  |
| Cu | 1.28106858  | 8.11691071 | 1.99721291  |
| Cu | 3.83454520  | 8.11136036 | 1.99505051  |
| Cu | 1.29741649  | 0.71884170 | 4.08366467  |
| Cu | 3.83867688  | 0.74336390 | 4.07645505  |
| Cu | 6.36577217  | 0.73586545 | 4.11517180  |
| Cu | 8.94627795  | 0.73755850 | 4.07217673  |
| Cu | -0.00170847 | 2.96721267 | 4.10842458  |
| Cu | 2.57028115  | 2.94423983 | 4.07736816  |
| Cu | 5.11606241  | 2.94525746 | 4.03304099  |
| Cu | 7.65650319  | 2.94467091 | 4.08950593  |

|    |             |            |            |
|----|-------------|------------|------------|
| Cu | -1.25722962 | 5.17709974 | 4.14747257 |
| Cu | 1.26514565  | 5.15197479 | 4.10228858 |
| Cu | 3.84592002  | 5.15351906 | 4.08338582 |
| Cu | 6.38816063  | 5.14785297 | 4.08419509 |
| Cu | -2.55435586 | 7.37259140 | 4.05726088 |
| Cu | -0.00188743 | 7.38106019 | 4.06209924 |
| Cu | 2.56027080  | 7.38195074 | 4.06173339 |
| Cu | 5.11479527  | 7.37903468 | 4.06762223 |
| Cu | 2.55949482  | 4.43259041 | 6.13353937 |
| Cu | 0.01439344  | 4.42328508 | 6.32070427 |
| Cu | -0.00053809 | 8.83297679 | 6.21537227 |
| Cu | 6.38804613  | 2.21656371 | 6.20439824 |
| Cu | 6.37180809  | 6.62925657 | 6.12610112 |
| Cu | 7.67131244  | 0.00119229 | 6.15549954 |
| Cu | 8.94037930  | 2.19741332 | 6.14220557 |
| Cu | -1.28526619 | 6.66317570 | 6.19839224 |
| Cu | -2.55406972 | 8.85073382 | 6.20057298 |
| Cu | 3.84962370  | 2.23219577 | 6.18022590 |
| Cu | 3.84057496  | 6.64310924 | 6.14120017 |
| Cu | 1.30588933  | 6.65305582 | 6.11043412 |
| Cu | -2.54322704 | 4.43312762 | 6.14786443 |
| Cu | 5.11842890  | 4.41748036 | 6.20370047 |
| Cu | 1.29427743  | 2.19060786 | 6.11837090 |
| Cu | -5.10849040 | 8.85172114 | 6.14734176 |

Str 12

Free energy from VASP is -314.36578500 eV

|     |           |           |           |           |           |
|-----|-----------|-----------|-----------|-----------|-----------|
| PBC | 10.223900 | 10.223900 | 20.000000 | 90.000000 | 90.000000 |
|-----|-----------|-----------|-----------|-----------|-----------|

120.000000

|    |            |             |             |
|----|------------|-------------|-------------|
| H  | 3.18884747 | 5.13945016  | 7.66619316  |
| H  | 4.93091472 | 2.30516965  | 8.55724713  |
| H  | 0.00285243 | 2.94979073  | 7.24978107  |
| H  | 2.83422972 | 5.88374676  | 10.16664110 |
| H  | 2.43386592 | 3.41324641  | 9.36180691  |
| H  | 4.53082722 | 5.82704721  | 10.73685407 |
| H  | 3.83523940 | 3.18856820  | 10.44993937 |
| H  | 4.11459299 | 6.80297218  | 9.31039158  |
| C  | 4.19560637 | 4.67451393  | 8.97785775  |
| C  | 3.88410250 | 5.87219458  | 9.84315344  |
| C  | 3.52850792 | 3.36592556  | 9.39790582  |
| O  | 5.35570339 | 4.57270748  | 8.43118547  |
| O  | 3.95013355 | 2.24902892  | 8.60858322  |
| Cu | 0.00077155 | -0.00555775 | -0.00135485 |

|    |             |             |             |
|----|-------------|-------------|-------------|
| Cu | 2.55787549  | -0.00270932 | 0.00815444  |
| Cu | 5.11045169  | -0.00007331 | 0.00207384  |
| Cu | 7.66721993  | -0.00063132 | -0.00128725 |
| Cu | 8.94514024  | 2.21166421  | 0.00488011  |
| Cu | 1.27947575  | 2.20926027  | 0.00428348  |
| Cu | 3.83606007  | 2.20968632  | 0.00422142  |
| Cu | 6.38753098  | 2.21175622  | 0.00039913  |
| Cu | -2.56142345 | 4.43061647  | -0.00032929 |
| Cu | -0.00080913 | 4.42911681  | 0.00169912  |
| Cu | 2.56196714  | 4.43030585  | 0.00553871  |
| Cu | 5.11192659  | 4.42786444  | 0.00763349  |
| Cu | 6.39084974  | 6.64096083  | 0.00269385  |
| Cu | -1.27982997 | 6.64433371  | 0.00198551  |
| Cu | 1.27762064  | 6.64270422  | 0.00187242  |
| Cu | 3.83525797  | 6.64029754  | 0.00649722  |
| Cu | 0.00155520  | 1.46922870  | 2.07559795  |
| Cu | 2.55610007  | 1.47934916  | 2.10060112  |
| Cu | 5.10999389  | 1.48178975  | 2.09694739  |
| Cu | 7.66768426  | 1.47454432  | 2.08170404  |
| Cu | -1.28146429 | 3.69372942  | 2.07150316  |
| Cu | 1.28720689  | 3.68765121  | 2.07786165  |
| Cu | 3.83211452  | 3.68438690  | 2.09923476  |
| Cu | 6.38829330  | 3.68391656  | 2.09830723  |
| Cu | -2.55791163 | 5.89973219  | 2.09345931  |
| Cu | 0.00253611  | 5.90277288  | 2.08276816  |
| Cu | 2.55993155  | 5.89843709  | 2.09871205  |
| Cu | 5.11224943  | 5.90064822  | 2.09085597  |
| Cu | -3.83692698 | 8.11638548  | 2.09822545  |
| Cu | -1.27946908 | 8.12162075  | 2.09857154  |
| Cu | 1.28137166  | 8.11242743  | 2.08359485  |
| Cu | 3.83473725  | 8.11869102  | 2.09265077  |
| Cu | 1.26899308  | 0.74549949  | 4.17424100  |
| Cu | 3.83220185  | 0.75273667  | 4.18656545  |
| Cu | 6.39048143  | 0.72973986  | 4.14911156  |
| Cu | 8.95138994  | 0.74890225  | 4.17391693  |
| Cu | 0.00286383  | 2.95251162  | 4.11783301  |
| Cu | 2.54998599  | 2.96073686  | 4.22472023  |
| Cu | 5.10119581  | 2.95550086  | 4.20487162  |
| Cu | 7.68706602  | 2.94666988  | 4.16491440  |
| Cu | -1.26557918 | 5.15769812  | 4.16335946  |
| Cu | 1.28009717  | 5.15098090  | 4.18015534  |
| Cu | 3.84962118  | 5.14859070  | 4.19190151  |
| Cu | 6.38091152  | 5.15389022  | 4.18025472  |
| Cu | -2.55641236 | 7.37585443  | 4.15658188  |

|    |             |            |            |
|----|-------------|------------|------------|
| Cu | 0.00487909  | 7.37395137 | 4.15962930 |
| Cu | 2.55851218  | 7.36722167 | 4.16634799 |
| Cu | 5.09783387  | 7.36285238 | 4.17983077 |
| Cu | -2.56842406 | 8.83934666 | 6.22801029 |
| Cu | 1.25355742  | 6.64942711 | 6.24378781 |
| Cu | -1.26647247 | 2.20346243 | 6.29676837 |
| Cu | -3.82123033 | 6.64898570 | 6.23255496 |
| Cu | 1.24042427  | 2.20193817 | 6.26997325 |
| Cu | 6.43075319  | 2.17355273 | 6.20103200 |
| Cu | 5.09998845  | 8.81414104 | 6.24011350 |
| Cu | -1.27384800 | 6.63985390 | 6.23233006 |
| Cu | 2.55068082  | 4.46734964 | 6.28943824 |
| Cu | -2.52735265 | 4.42759773 | 6.21184467 |
| Cu | -0.00781873 | 4.41102194 | 6.28505770 |
| Cu | 3.80983829  | 2.19214614 | 6.31211282 |
| Cu | 3.80270398  | 6.62636676 | 6.28418705 |
| Cu | 5.19224676  | 4.39734756 | 6.32494433 |
| Cu | 2.55750380  | 8.84602421 | 6.23946508 |
| Cu | 0.00779878  | 8.84104925 | 6.22896725 |

Str 13

Free energy from VASP is -315.13369500 eV

|     |           |           |           |           |           |
|-----|-----------|-----------|-----------|-----------|-----------|
| PBC | 10.223900 | 10.223900 | 20.000000 | 90.000000 | 90.000000 |
|-----|-----------|-----------|-----------|-----------|-----------|

120.000000

|    |             |            |             |
|----|-------------|------------|-------------|
| H  | 6.50208775  | 3.64138652 | 7.25819292  |
| H  | 1.49152765  | 1.21876058 | 8.78810102  |
| H  | 3.82414618  | 2.28036676 | 9.31488730  |
| H  | 3.47034066  | 5.31352251 | 9.70942238  |
| H  | 1.32391519  | 4.05328607 | 9.11930619  |
| H  | 3.75688600  | 4.13225986 | 11.02137600 |
| H  | 1.67317508  | 2.88101493 | 10.42984696 |
| H  | 5.00803751  | 4.41414884 | 9.78270421  |
| C  | 3.33089876  | 3.24559027 | 9.08086489  |
| C  | 3.92634763  | 4.34276222 | 9.95458957  |
| C  | 1.83516550  | 3.10852034 | 9.36334195  |
| O  | 3.56601497  | 3.51946787 | 7.69524136  |
| O  | 1.16684175  | 2.11180982 | 8.55640611  |
| Cu | 0.00124075  | 0.00055852 | 19.99474357 |
| Cu | 2.55484897  | 0.00020033 | 19.99666653 |
| Cu | -0.00060682 | 8.85004162 | 19.99611525 |
| Cu | 2.55285170  | 8.84790803 | 19.98798567 |
| Cu | -1.27611419 | 2.21078886 | 19.99426688 |
| Cu | 1.27982840  | 2.21274635 | 0.00253221  |



|    |             |            |             |
|----|-------------|------------|-------------|
| Cu | 3.82888067  | 2.21272276 | 0.00773003  |
| Cu | 6.38697436  | 2.21247032 | 19.99860700 |
| Cu | 7.66653519  | 4.42731252 | 0.00335632  |
| Cu | 0.00443163  | 4.43221199 | 19.99513351 |
| Cu | 2.55332790  | 4.42901193 | 0.00792961  |
| Cu | 5.10856355  | 4.42701038 | 0.00789929  |
| Cu | -3.83456321 | 6.64314273 | 0.00105361  |
| Cu | -1.27499249 | 6.64060856 | 0.01291231  |
| Cu | 1.27831152  | 6.63938534 | 0.00895387  |
| Cu | 3.82902468  | 6.63967535 | 19.99340083 |
| Cu | -0.00136469 | 1.47794697 | 2.08238915  |
| Cu | 2.55353845  | 1.48050315 | 2.09602237  |
| Cu | 5.11002335  | 1.47349394 | 2.08269005  |
| Cu | 7.66605112  | 1.46946724 | 2.06154704  |
| Cu | -1.26699693 | 3.68757216 | 2.07098891  |
| Cu | 1.27904376  | 3.68774311 | 2.09564094  |
| Cu | 3.82275543  | 3.68823267 | 2.10442421  |
| Cu | 6.37950677  | 3.68665912 | 2.08203089  |
| Cu | -2.56565351 | 5.89648659 | 2.07992426  |
| Cu | 0.00268125  | 5.89347551 | 2.10312239  |
| Cu | 2.56179353  | 5.89938323 | 2.09988819  |
| Cu | 5.10202183  | 5.89870122 | 2.08359235  |
| Cu | -3.83670722 | 8.12337532 | 2.08517661  |
| Cu | -1.28201380 | 8.12436923 | 2.08572529  |
| Cu | 1.27596876  | 8.11992999 | 2.08729633  |
| Cu | 3.83194025  | 8.11550041 | 2.07144917  |
| Cu | 1.27585819  | 0.75317599 | 4.18061699  |
| Cu | 3.83162753  | 0.74702898 | 4.17655629  |
| Cu | 6.38806900  | 0.75769557 | 4.17329220  |
| Cu | 8.93775599  | 0.73461548 | 4.14332894  |
| Cu | 0.00657024  | 2.95089668 | 4.17626486  |
| Cu | 2.54265469  | 2.95247740 | 4.21641831  |
| Cu | 5.09629208  | 2.95026178 | 4.18657206  |
| Cu | 7.66362600  | 2.94948324 | 4.12066179  |
| Cu | -1.31180926 | 5.15164625 | 4.16478555  |
| Cu | 1.29681325  | 5.16016096 | 4.18610743  |
| Cu | 3.84773181  | 5.13345833 | 4.22922792  |
| Cu | 6.36346518  | 5.14675676 | 4.17657939  |
| Cu | -2.56219646 | 7.36581293 | 4.13811353  |
| Cu | -0.00607171 | 7.37498353 | 4.14352649  |
| Cu | 2.55098785  | 7.37595283 | 4.15097936  |
| Cu | 5.10565360  | 7.37099518 | 4.13865065  |
| Cu | 2.47222431  | 4.49441848 | 6.31058503  |
| Cu | 6.41437810  | 2.20240557 | 6.26989429  |

|    |             |            |            |
|----|-------------|------------|------------|
| Cu | -2.56719879 | 8.80768544 | 6.21264460 |
| Cu | 0.00323865  | 8.83424604 | 6.22860095 |
| Cu | 3.81843919  | 2.11499696 | 6.26189912 |
| Cu | 5.09176501  | 8.83133738 | 6.20984579 |
| Cu | -0.04288566 | 4.45358572 | 6.20841724 |
| Cu | 7.66687467  | 4.42545329 | 6.28768551 |
| Cu | 2.55016851  | 8.84937379 | 6.23092394 |
| Cu | 1.25637723  | 6.66694211 | 6.23394357 |
| Cu | 6.38030091  | 6.65375747 | 6.21765584 |
| Cu | 5.15465784  | 4.43639220 | 6.40166904 |
| Cu | 1.22140257  | 2.19512551 | 6.32120962 |
| Cu | -1.29179968 | 6.63924526 | 6.22466536 |
| Cu | 3.82979770  | 6.66504680 | 6.21865777 |
| Cu | 8.93154075  | 2.19976854 | 6.19666883 |

Str 14

Free energy from VASP is -314.19577500 eV

|            |             |             |             |           |           |
|------------|-------------|-------------|-------------|-----------|-----------|
| PBC        | 10.223900   | 10.223900   | 20.000000   | 90.000000 | 90.000000 |
| 120.000000 |             |             |             |           |           |
| H          | 4.96958691  | 3.09542150  | 7.37222727  |           |           |
| H          | 1.58928254  | 1.23549810  | 8.83651763  |           |           |
| H          | 3.84543840  | 2.22324218  | 9.55039304  |           |           |
| H          | 3.62035048  | 5.27587685  | 9.90322839  |           |           |
| H          | 1.42757876  | 4.07232355  | 9.16149478  |           |           |
| H          | 3.72310151  | 4.11504188  | 11.26056703 |           |           |
| H          | 1.62778424  | 2.90271499  | 10.50504539 |           |           |
| H          | 5.08443029  | 4.29101463  | 10.12457442 |           |           |
| C          | 3.40417541  | 3.20868506  | 9.29960610  |           |           |
| C          | 3.98960230  | 4.28578835  | 10.20709112 |           |           |
| C          | 1.88653530  | 3.11573767  | 9.45459259  |           |           |
| O          | 3.71225550  | 3.49824091  | 7.92704841  |           |           |
| O          | 1.26835518  | 2.12860950  | 8.60026481  |           |           |
| Cu         | 0.00195489  | 0.00045008  | 0.00126044  |           |           |
| Cu         | 2.55607625  | 0.00031372  | -0.00215015 |           |           |
| Cu         | 5.11452298  | -0.00162019 | -0.00229324 |           |           |
| Cu         | 7.66915875  | 0.00002653  | 0.00219736  |           |           |
| Cu         | 8.94764946  | 2.21237046  | 0.00607205  |           |           |
| Cu         | 1.27975364  | 2.21396515  | 0.00497775  |           |           |
| Cu         | 3.83323979  | 2.21280674  | 0.00359600  |           |           |
| Cu         | 6.39175798  | 2.21209565  | 0.00018321  |           |           |
| Cu         | -2.55262466 | 4.42571171  | -0.00095050 |           |           |
| Cu         | 0.00154386  | 4.42743676  | 0.00439388  |           |           |
| Cu         | 2.55360268  | 4.42742417  | 0.00477225  |           |           |

|    |             |            |             |
|----|-------------|------------|-------------|
| Cu | 5.11268571  | 4.42687984 | -0.00034226 |
| Cu | 6.39070239  | 6.64226581 | -0.00448841 |
| Cu | -1.27305052 | 6.63952532 | 0.00164957  |
| Cu | 1.27841883  | 6.64034353 | 0.00262922  |
| Cu | 3.83377864  | 6.64043821 | -0.00273936 |
| Cu | 0.00129742  | 1.47725586 | 2.09404935  |
| Cu | 2.55410455  | 1.47817154 | 2.08983057  |
| Cu | 5.11555901  | 1.47489640 | 2.08221153  |
| Cu | 7.66981892  | 1.47464530 | 2.08550419  |
| Cu | -1.27160817 | 3.68454443 | 2.09318081  |
| Cu | 1.28029600  | 3.68763670 | 2.10064256  |
| Cu | 3.82767007  | 3.68821100 | 2.08858100  |
| Cu | 6.39022815  | 3.68615598 | 2.07998498  |
| Cu | -2.55046208 | 5.90126354 | 2.06587974  |
| Cu | 0.01164609  | 5.89761163 | 2.09629555  |
| Cu | 2.55791644  | 5.90256666 | 2.09099826  |
| Cu | 5.11027838  | 5.90384791 | 2.07363916  |
| Cu | -3.83019601 | 8.12178016 | 2.08963073  |
| Cu | -1.27274427 | 8.11942119 | 2.07678244  |
| Cu | 1.27995853  | 8.11872839 | 2.08648655  |
| Cu | 3.83380447  | 8.11696928 | 2.08443120  |
| Cu | 1.27960976  | 0.75144207 | 4.18661472  |
| Cu | 3.83703344  | 0.73242582 | 4.15591471  |
| Cu | 6.38921723  | 0.75071700 | 4.17737401  |
| Cu | 8.94070481  | 0.73946176 | 4.16469977  |
| Cu | 0.00980271  | 2.94458887 | 4.19116704  |
| Cu | 2.55151313  | 2.95090567 | 4.20732396  |
| Cu | 5.10570505  | 2.95212902 | 4.15642618  |
| Cu | 7.65861634  | 2.95120755 | 4.16823289  |
| Cu | -1.27138336 | 5.16234986 | 4.15512579  |
| Cu | 1.30470083  | 5.15541698 | 4.19586241  |
| Cu | 3.83840799  | 5.15631592 | 4.17627170  |
| Cu | 6.40753224  | 5.17497528 | 4.13278338  |
| Cu | -2.54352110 | 7.37169124 | 4.13991195  |
| Cu | 0.00860057  | 7.37552174 | 4.15886425  |
| Cu | 2.55624751  | 7.38261854 | 4.16189326  |
| Cu | 5.11633572  | 7.37672275 | 4.15255332  |
| Cu | 2.56323684  | 4.45235579 | 6.32027631  |
| Cu | 6.35251840  | 2.24990810 | 6.32681260  |
| Cu | -2.55620132 | 8.81277470 | 6.21524510  |
| Cu | 0.01320267  | 8.82168751 | 6.24692564  |
| Cu | 3.83209732  | 2.11236669 | 6.21465120  |
| Cu | 5.09601230  | 8.84096101 | 6.23062940  |
| Cu | 0.00068665  | 4.44152172 | 6.23180163  |

|    |             |            |            |
|----|-------------|------------|------------|
| Cu | -2.52031355 | 4.44077773 | 6.24724299 |
| Cu | 7.65735886  | 0.01383174 | 6.24853077 |
| Cu | 1.29078503  | 6.64439164 | 6.25395140 |
| Cu | -3.81405668 | 6.66163034 | 6.23203542 |
| Cu | 5.21552976  | 4.48301477 | 6.19226657 |
| Cu | 1.24487977  | 2.19807170 | 6.32938769 |
| Cu | -1.26614111 | 6.63773319 | 6.24418952 |
| Cu | 3.84389427  | 6.66432173 | 6.22430063 |
| Cu | 8.91142286  | 2.21216730 | 6.23456273 |

Str 15

Free energy from VASP is -315.28105400 eV

|     |           |           |           |           |           |
|-----|-----------|-----------|-----------|-----------|-----------|
| PBC | 10.223900 | 10.223900 | 20.000000 | 90.000000 | 90.000000 |
|-----|-----------|-----------|-----------|-----------|-----------|

120.000000

|    |             |            |             |
|----|-------------|------------|-------------|
| H  | 5.07611304  | 3.01154221 | 8.71284723  |
| H  | 1.63849745  | 1.23306128 | 9.04114981  |
| H  | 3.63725197  | 2.08095479 | 10.43639492 |
| H  | 3.72484886  | 5.14926658 | 10.12896538 |
| H  | 1.73742157  | 4.08645510 | 9.08805681  |
| H  | 3.39255503  | 4.27087815 | 11.64903302 |
| H  | 1.41346002  | 3.14259920 | 10.57315519 |
| H  | 4.99223086  | 4.15395931 | 10.89211927 |
| C  | 3.43596192  | 3.01552438 | 9.87589332  |
| C  | 3.91516545  | 4.21883431 | 10.68318483 |
| C  | 1.94093967  | 3.13587788 | 9.60393219  |
| O  | 4.10813726  | 2.93382290 | 8.59825835  |
| O  | 1.38311008  | 2.12698689 | 8.74161888  |
| Cu | 0.00216451  | 0.00409987 | 0.00463222  |
| Cu | 2.55683678  | 0.00541139 | 0.00797226  |
| Cu | 5.11234469  | 0.00238150 | 19.99655332 |
| Cu | 7.66901990  | 0.00106481 | 19.99298266 |
| Cu | -1.27355770 | 2.21432462 | 0.00455679  |
| Cu | 1.28076863  | 2.21428264 | 0.01529285  |
| Cu | 3.83170936  | 2.21347705 | 0.00761679  |
| Cu | 6.38969037  | 2.21329334 | 19.99695901 |
| Cu | -2.55259214 | 4.42602769 | 19.99952067 |
| Cu | 0.00417019  | 4.42565930 | 0.00473920  |
| Cu | 2.55549179  | 4.42413522 | 0.00372897  |
| Cu | 5.11026492  | 4.42520581 | 19.99711008 |
| Cu | -3.83222182 | 6.64494666 | 19.99436898 |
| Cu | -1.27578727 | 6.64472567 | 19.99616209 |
| Cu | 1.27872320  | 6.64195656 | 19.99002133 |
| Cu | 3.83430880  | 6.64239249 | 19.98958812 |

|    |             |            |            |
|----|-------------|------------|------------|
| Cu | 0.00521843  | 1.47959491 | 2.10025150 |
| Cu | 2.55882328  | 1.48101341 | 2.11009371 |
| Cu | 5.11328100  | 1.47877571 | 2.08421734 |
| Cu | 7.67232760  | 1.47699559 | 2.07448809 |
| Cu | -1.26404796 | 3.68934358 | 2.08912380 |
| Cu | 1.28540229  | 3.68650133 | 2.10608417 |
| Cu | 3.82939230  | 3.68632811 | 2.09269593 |
| Cu | 6.39019374  | 3.68900675 | 2.07678716 |
| Cu | -2.54990542 | 5.90705384 | 2.06691297 |
| Cu | 0.00274090  | 5.90845205 | 2.07307857 |
| Cu | 2.55766517  | 5.90711095 | 2.06885896 |
| Cu | 5.11570786  | 5.90622963 | 2.06421285 |
| Cu | -3.83000321 | 8.12722862 | 2.08754192 |
| Cu | -1.27351083 | 8.12783256 | 2.08605947 |
| Cu | 1.28028942  | 8.11860691 | 2.07126743 |
| Cu | 3.83610236  | 8.11971286 | 2.07552327 |
| Cu | 1.28278933  | 0.75230460 | 4.19397710 |
| Cu | 3.84335314  | 0.75233076 | 4.18519214 |
| Cu | 6.39632082  | 0.73947335 | 4.14901487 |
| Cu | 8.94757672  | 0.74138231 | 4.16024050 |
| Cu | 0.01951001  | 2.94826338 | 4.20034762 |
| Cu | 2.55874494  | 2.94591463 | 4.22007331 |
| Cu | 5.10935082  | 2.95375118 | 4.16579422 |
| Cu | 7.67899245  | 2.95788128 | 4.14587437 |
| Cu | -1.27304953 | 5.17115818 | 4.15162967 |
| Cu | 1.27795945  | 5.17769618 | 4.14824395 |
| Cu | 3.83832699  | 5.17528597 | 4.13807262 |
| Cu | 6.40189618  | 5.17323819 | 4.13745552 |
| Cu | -2.54913127 | 7.38235069 | 4.14932808 |
| Cu | 0.00280752  | 7.38594803 | 4.15537369 |
| Cu | 2.55794843  | 7.38493045 | 4.15096585 |
| Cu | 5.11927007  | 7.38214012 | 4.14720491 |
| Cu | 2.55264192  | 4.47247716 | 6.20331448 |
| Cu | 6.40967340  | 2.21769022 | 6.20916119 |
| Cu | -2.54707707 | 8.83507326 | 6.22845192 |
| Cu | 5.12497180  | 0.00013332 | 6.24178247 |
| Cu | 3.84751049  | 2.21562703 | 6.30373462 |
| Cu | 5.10609372  | 8.84475562 | 6.22989663 |
| Cu | -0.00175623 | 4.44851860 | 6.22951028 |
| Cu | -2.55413814 | 4.43257528 | 6.23492102 |
| Cu | 7.66937639  | 0.00514452 | 6.23963483 |
| Cu | 1.27824618  | 6.65617630 | 6.24183958 |
| Cu | -3.82773287 | 6.64544726 | 6.23618747 |
| Cu | 5.12678910  | 4.45794506 | 6.19310534 |

|    |             |            |            |
|----|-------------|------------|------------|
| Cu | 1.27428617  | 2.21329328 | 6.36463285 |
| Cu | -1.27467138 | 6.64363514 | 6.23927356 |
| Cu | 3.83689899  | 6.65557024 | 6.22631874 |
| Cu | 8.93747271  | 2.21724143 | 6.24166281 |

## 2. 1,3-PDO-dehydrogenation path

Str 1

Free energy from VASP is -328.39379400 eV

|     |           |           |           |           |           |
|-----|-----------|-----------|-----------|-----------|-----------|
| PBC | 10.223900 | 10.223900 | 20.000000 | 90.000000 | 90.000000 |
|-----|-----------|-----------|-----------|-----------|-----------|

120.000000

|    |             |            |             |
|----|-------------|------------|-------------|
| H  | 2.56691945  | 1.43923141 | 7.25711903  |
| H  | -0.04377945 | 2.94207071 | 7.26393275  |
| H  | 1.94551802  | 5.59350670 | 11.35439436 |
| H  | 1.76263090  | 6.24853554 | 8.99010230  |
| H  | 2.17365364  | 3.79615525 | 9.64350942  |
| H  | 2.56244699  | 7.54714549 | 9.93089289  |
| H  | 3.10591426  | 3.43031148 | 11.13626072 |
| H  | 4.74420331  | 5.94699531 | 11.06855044 |
| H  | 4.19671842  | 5.57640868 | 8.76773784  |
| H  | 4.16467228  | 3.36776412 | 8.77649582  |
| C  | 2.85629577  | 5.54905729 | 10.73368286 |
| C  | 2.67251270  | 6.51886758 | 9.55972649  |
| C  | 3.03096740  | 4.10086297 | 10.26669922 |
| O  | 3.92418748  | 5.94984188 | 11.59620540 |
| O  | 3.83227244  | 6.50257320 | 8.68242509  |
| O  | 4.26507973  | 4.02136705 | 9.50131530  |
| Cu | 5.10835498  | 8.84704951 | 0.00127886  |
| Cu | -2.55543284 | 8.85212949 | 0.00592344  |
| Cu | 0.00152531  | 8.85223995 | 0.00382139  |
| Cu | 2.55532374  | 8.85039728 | 0.00186300  |
| Cu | 8.94196113  | 2.21496390 | 0.00537177  |
| Cu | 1.27766833  | 2.21275799 | 0.01181878  |
| Cu | 3.83527190  | 2.21290275 | 0.00614283  |
| Cu | 6.39109844  | 2.21514433 | 0.00009607  |
| Cu | 7.66517761  | 4.42851017 | 0.00553876  |
| Cu | -0.00407226 | 4.42907591 | 0.00459696  |
| Cu | 2.55961507  | 4.43283322 | 0.00119318  |
| Cu | 5.11424490  | 4.43011061 | 0.00250585  |
| Cu | 6.38824836  | 6.63671419 | 0.00238845  |
| Cu | -1.27942586 | 6.63810758 | 19.99957806 |
| Cu | 1.28003365  | 6.64250111 | 0.00191010  |
| Cu | 3.83422949  | 6.64042098 | 0.00235666  |
| Cu | -0.00423426 | 1.47161580 | 2.07977278  |
| Cu | 2.55589452  | 1.47251059 | 2.08560339  |
| Cu | 5.11418136  | 1.47617222 | 2.08145297  |
| Cu | 7.66551325  | 1.47261319 | 2.08871219  |
| Cu | -1.27891381 | 3.68798736 | 2.08911201  |
| Cu | 1.27788053  | 3.69337579 | 2.07727849  |
| Cu | 3.83334997  | 3.69403090 | 2.09033757  |

|    |             |            |            |
|----|-------------|------------|------------|
| Cu | 6.38841629  | 3.68404943 | 2.09613188 |
| Cu | -2.55303085 | 5.90494884 | 2.09663548 |
| Cu | -0.00047430 | 5.90443256 | 2.08853882 |
| Cu | 2.55339313  | 5.90226380 | 2.09608390 |
| Cu | 5.10910155  | 5.90458536 | 2.09220622 |
| Cu | -3.83943831 | 8.11244607 | 2.09396081 |
| Cu | -1.27932440 | 8.11161499 | 2.08182064 |
| Cu | 1.28246514  | 8.11275440 | 2.09833809 |
| Cu | 3.83285494  | 8.11634263 | 2.09794856 |
| Cu | 1.27193739  | 0.74587709 | 4.17299303 |
| Cu | 3.83142993  | 0.73273696 | 4.15585214 |
| Cu | 6.38460431  | 0.73703332 | 4.16401753 |
| Cu | 8.94420544  | 0.74866030 | 4.17545024 |
| Cu | 0.01492573  | 2.93748268 | 4.15676738 |
| Cu | 2.54133091  | 2.94105598 | 4.16509683 |
| Cu | 5.08758403  | 2.93410405 | 4.17473073 |
| Cu | 7.67532782  | 2.94732979 | 4.17646723 |
| Cu | -1.27503493 | 5.14946691 | 4.17670800 |
| Cu | 1.26190231  | 5.15132609 | 4.17196157 |
| Cu | 3.83398467  | 5.17622035 | 4.18245299 |
| Cu | 6.39091061  | 5.15895545 | 4.15547868 |
| Cu | -2.55990830 | 7.39575798 | 4.17958269 |
| Cu | -0.00770047 | 7.37607806 | 4.16226879 |
| Cu | 2.56593376  | 7.36622985 | 4.19529103 |
| Cu | 5.09781619  | 7.36443810 | 4.19058329 |
| Cu | -1.29035035 | 6.62612545 | 6.24104059 |
| Cu | 3.80857431  | 6.63558855 | 6.39840559 |
| Cu | 2.55384290  | 4.42880453 | 6.20207207 |
| Cu | 1.26352078  | 2.20016581 | 6.38378922 |
| Cu | 1.24265767  | 6.62351804 | 6.22606784 |
| Cu | 7.63890418  | 4.42503411 | 6.24229195 |
| Cu | 8.93798225  | 2.20835420 | 6.29049756 |
| Cu | -0.01321614 | 4.40110437 | 6.29540073 |
| Cu | 3.81436428  | 2.19427375 | 6.29373834 |
| Cu | 5.08698574  | 8.82344876 | 6.21786136 |
| Cu | 7.64714502  | 0.00655731 | 6.23065635 |
| Cu | -2.56704074 | 8.84244127 | 6.28868698 |
| Cu | 6.38916387  | 6.62419146 | 6.23020158 |
| Cu | 0.00252283  | 8.83265511 | 6.23671930 |
| Cu | 5.10719284  | 4.39874502 | 6.21703056 |
| Cu | 6.37317998  | 2.20179951 | 6.24412414 |



Free energy from VASP is -327.36260600 eV

| PBC        | 10.223900   | 10.223900   | 20.000000   | 90.000000 | 90.000000 |
|------------|-------------|-------------|-------------|-----------|-----------|
| 120.000000 |             |             |             |           |           |
| H          | 2.99761186  | 5.67667921  | 7.35343176  |           |           |
| H          | 1.60759316  | 8.32430256  | 11.03827891 |           |           |
| H          | -0.38146860 | 7.98926225  | 9.07584354  |           |           |
| H          | 2.81936316  | 7.96068304  | 8.94543691  |           |           |
| H          | -0.44654041 | 7.04479669  | 11.60641624 |           |           |
| H          | 2.94570645  | 6.55287705  | 10.04685761 |           |           |
| H          | 0.98204320  | 5.97254351  | 11.56912339 |           |           |
| H          | 0.02181787  | 2.95474206  | 7.23472821  |           |           |
| H          | -2.55001116 | 7.39393356  | 7.24696705  |           |           |
| H          | 0.28432576  | 5.57142050  | 9.30615621  |           |           |
| C          | 1.12828456  | 7.69907180  | 10.26412171 |           |           |
| C          | 2.25516666  | 7.11497658  | 9.38825906  |           |           |
| C          | 0.31093138  | 6.59626227  | 10.94645737 |           |           |
| O          | 0.27833819  | 8.57114733  | 9.50719074  |           |           |
| O          | 1.75220394  | 6.23552838  | 8.38851008  |           |           |
| O          | -0.39579869 | 5.80814486  | 9.98429453  |           |           |
| Cu         | -0.00186215 | -0.00095479 | -0.00359628 |           |           |
| Cu         | 2.56375801  | -0.00088330 | 0.01120208  |           |           |
| Cu         | 5.11818975  | 0.00005989  | 0.00646399  |           |           |
| Cu         | 7.66596244  | 0.00179656  | 0.00742814  |           |           |
| Cu         | 8.94490656  | 2.21388197  | 0.00675079  |           |           |
| Cu         | 1.28130255  | 2.21678448  | 0.00643400  |           |           |
| Cu         | 3.83796900  | 2.21075465  | -0.00377055 |           |           |
| Cu         | 6.39337867  | 2.21121290  | -0.00136893 |           |           |
| Cu         | -2.55695606 | 4.42393441  | -0.00865433 |           |           |
| Cu         | 0.00394233  | 4.42801551  | 0.01359926  |           |           |
| Cu         | 2.56031667  | 4.43097038  | 0.00098756  |           |           |
| Cu         | 5.11317256  | 4.42819338  | -0.00572953 |           |           |
| Cu         | 6.39236778  | 6.64099181  | 0.00078626  |           |           |
| Cu         | -1.27281953 | 6.64438205  | 0.01540542  |           |           |
| Cu         | 1.27915726  | 6.64447940  | 0.01584997  |           |           |
| Cu         | 3.83399084  | 6.63863284  | 0.00424822  |           |           |
| Cu         | 0.01041790  | 1.46945035  | 2.08267990  |           |           |
| Cu         | 2.56419037  | 1.47682674  | 2.09183854  |           |           |
| Cu         | 5.11458810  | 1.47548848  | 2.09330505  |           |           |
| Cu         | 7.66884893  | 1.47447978  | 2.09205948  |           |           |
| Cu         | -1.27778280 | 3.69901585  | 2.08640013  |           |           |
| Cu         | 1.28744899  | 3.69980902  | 2.09148781  |           |           |
| Cu         | 3.83924374  | 3.68087992  | 2.07766272  |           |           |
| Cu         | 6.39595316  | 3.68852840  | 2.08546715  |           |           |
| Cu         | -2.54915733 | 5.89388649  | 2.08177947  |           |           |

|    |             |             |            |
|----|-------------|-------------|------------|
| Cu | 0.00758899  | 5.90625906  | 2.11460005 |
| Cu | 2.55452138  | 5.90513297  | 2.10172733 |
| Cu | 5.11940825  | 5.90236748  | 2.07516663 |
| Cu | -3.83265719 | 8.12048400  | 2.07922951 |
| Cu | -1.25754030 | 8.11265138  | 2.10601864 |
| Cu | 1.27899719  | 8.11188572  | 2.11314132 |
| Cu | 3.83378583  | 8.11562760  | 2.09694334 |
| Cu | 1.29545610  | 0.73977070  | 4.18450084 |
| Cu | 3.84009936  | 0.72195290  | 4.18497603 |
| Cu | 6.39318377  | 0.73700460  | 4.17226242 |
| Cu | 8.95918831  | 0.74834685  | 4.17004952 |
| Cu | 0.01127120  | 2.95492295  | 4.12460999 |
| Cu | 2.55281232  | 2.95827218  | 4.18230773 |
| Cu | 5.11858866  | 2.95336109  | 4.15697516 |
| Cu | 7.68928276  | 2.95091993  | 4.17371514 |
| Cu | -1.26451345 | 5.17315950  | 4.19746134 |
| Cu | 1.28434540  | 5.17686696  | 4.23433390 |
| Cu | 3.84631409  | 5.15802074  | 4.13100997 |
| Cu | 6.40090579  | 5.17673964  | 4.17097444 |
| Cu | -2.54388865 | 7.37697873  | 4.12651172 |
| Cu | 0.02777238  | 7.36338391  | 4.26232999 |
| Cu | 2.55341609  | 7.36821717  | 4.19953490 |
| Cu | 5.12718055  | 7.37202582  | 4.16957636 |
| Cu | -3.80514954 | 6.65141414  | 6.28631260 |
| Cu | 1.28697015  | 2.22296026  | 6.28072785 |
| Cu | 7.65873592  | 4.41857577  | 6.23630419 |
| Cu | 3.84568885  | 2.20275187  | 6.22819423 |
| Cu | -1.28745943 | 6.64524450  | 6.30347991 |
| Cu | 2.56405644  | -0.00199837 | 6.29157032 |
| Cu | 5.13637038  | 4.42526990  | 6.24311762 |
| Cu | 7.69200978  | 0.03439102  | 6.22293099 |
| Cu | 6.40555407  | 2.22694689  | 6.23673069 |
| Cu | 3.88405737  | 6.61309641  | 6.23593343 |
| Cu | 5.14311452  | 0.03830730  | 6.27742508 |
| Cu | 5.10664622  | 8.84303748  | 6.21964887 |
| Cu | 8.97022682  | 2.22121414  | 6.29427998 |
| Cu | 1.27528161  | 6.67890696  | 6.46646459 |
| Cu | -0.00484630 | 4.40772219  | 6.27282966 |
| Cu | 2.63185840  | 4.42231460  | 6.25119226 |

Str 3

Free energy from VASP is -328.45724400 eV

|     |           |           |           |           |           |
|-----|-----------|-----------|-----------|-----------|-----------|
| PBC | 10.223900 | 10.223900 | 20.000000 | 90.000000 | 90.000000 |
|-----|-----------|-----------|-----------|-----------|-----------|

120.000000

|    |             |            |             |
|----|-------------|------------|-------------|
| H  | 2.53812477  | 5.90776665 | 7.24483954  |
| H  | 2.53256387  | 1.45778952 | 7.25969997  |
| H  | -2.58990461 | 5.68963354 | 9.15885972  |
| H  | -1.92490572 | 5.18095000 | 11.51986597 |
| H  | -1.83050090 | 3.38099427 | 9.61605004  |
| H  | -0.22847705 | 5.57601744 | 11.13765444 |
| H  | -0.12451520 | 3.84593230 | 9.36999028  |
| H  | 0.14598346  | 6.28290093 | 8.63205560  |
| H  | 5.14198897  | 2.96490280 | 7.25421477  |
| H  | -1.15008911 | 7.72599262 | 10.55801283 |
| C  | -1.53418860 | 5.49853229 | 9.41160431  |
| C  | -1.28299456 | 5.81270339 | 10.88754905 |
| C  | -1.16402289 | 4.05780910 | 9.05389477  |
| O  | -0.81764086 | 6.47427948 | 8.60210791  |
| O  | -1.59856339 | 7.16009802 | 11.21488450 |
| O  | -1.27788975 | 3.79329527 | 7.65689366  |
| Cu | -5.10994155 | 8.85221241 | 19.99387207 |
| Cu | -2.55787954 | 8.85368343 | 0.01126952  |
| Cu | -0.00104520 | 8.84807800 | 19.99004678 |
| Cu | 2.55804614  | 8.85331380 | 19.99386471 |
| Cu | 8.94359882  | 2.21621149 | 19.99645285 |
| Cu | 1.27714079  | 2.20703946 | 19.99830438 |
| Cu | 3.83273814  | 2.20960225 | 0.00330008  |
| Cu | 6.39516362  | 2.21657622 | 0.00132612  |
| Cu | -2.55223127 | 4.42828566 | 0.00987633  |
| Cu | -0.00686745 | 4.42766945 | 0.00063345  |
| Cu | 2.55290338  | 4.43369056 | 19.99401729 |
| Cu | 5.11791559  | 4.42889300 | 19.99820875 |
| Cu | -3.83124345 | 6.64086739 | 19.99077175 |
| Cu | -1.28143337 | 6.63842408 | 19.99524588 |
| Cu | 1.27997607  | 6.64015881 | 19.99963196 |
| Cu | 3.83333349  | 6.64287162 | 0.01069541  |
| Cu | -0.00454936 | 1.47912508 | 2.08131310  |
| Cu | 2.55570926  | 1.47933100 | 2.09250699  |
| Cu | 5.11462578  | 1.47104277 | 2.06906082  |
| Cu | 7.67089245  | 1.47507497 | 2.09260328  |
| Cu | -1.27650765 | 3.68766463 | 2.10761023  |
| Cu | 1.27852975  | 3.68083061 | 2.07700820  |
| Cu | 3.83266633  | 3.69157652 | 2.06610281  |
| Cu | 6.38917455  | 3.68793360 | 2.09388489  |
| Cu | -2.55775208 | 5.90672902 | 2.10630929  |
| Cu | -0.00494907 | 5.90440710 | 2.08158704  |
| Cu | 2.55337223  | 5.89637134 | 2.09046373  |

|    |             |            |            |
|----|-------------|------------|------------|
| Cu | 5.12264052  | 5.90323761 | 2.08678303 |
| Cu | -3.82853178 | 8.10359476 | 2.09585009 |
| Cu | -1.27626368 | 8.11331913 | 2.09528260 |
| Cu | 1.26912684  | 8.12036966 | 2.08096802 |
| Cu | 3.84049267  | 8.13150351 | 2.08473240 |
| Cu | 1.28028348  | 0.72898686 | 4.13651911 |
| Cu | 3.83605904  | 0.74967136 | 4.16355651 |
| Cu | 6.38705520  | 0.75107002 | 4.15842502 |
| Cu | 8.95312716  | 0.76481184 | 4.19250643 |
| Cu | 0.01396812  | 2.93649174 | 4.19894017 |
| Cu | 2.57236896  | 2.97270112 | 4.18976747 |
| Cu | 5.08760781  | 2.93820093 | 4.14166669 |
| Cu | 7.66862993  | 2.95630636 | 4.20978528 |
| Cu | -1.28379126 | 5.16512459 | 4.19243394 |
| Cu | 1.26373221  | 5.14722391 | 4.15866965 |
| Cu | 3.84640243  | 5.15946280 | 4.15914117 |
| Cu | 6.39874959  | 5.14333629 | 4.19589801 |
| Cu | -2.53656692 | 7.39545315 | 4.20885031 |
| Cu | 0.01361777  | 7.34970991 | 4.19010720 |
| Cu | 2.56524459  | 7.38464641 | 4.12595416 |
| Cu | 5.09167570  | 7.36518208 | 4.17059414 |
| Cu | 6.34763197  | 2.19586004 | 6.25871791 |
| Cu | 7.66702437  | 0.01145597 | 6.21371976 |
| Cu | 2.56382456  | 4.45357458 | 6.27714080 |
| Cu | 3.84033093  | 6.63931377 | 6.29072671 |
| Cu | 5.10396463  | 8.83150202 | 6.22101936 |
| Cu | 1.33474013  | 6.65038735 | 6.23723373 |
| Cu | 2.55385131  | 0.00913860 | 6.28536804 |
| Cu | 8.95225324  | 2.15076564 | 6.32435987 |
| Cu | 3.83659038  | 2.20441771 | 6.37626943 |
| Cu | 0.05901437  | 4.43540380 | 6.23424991 |
| Cu | 5.10496061  | 4.40511458 | 6.26829470 |
| Cu | -1.26507289 | 6.67602121 | 6.31394997 |
| Cu | 0.02594192  | 8.83185114 | 6.19785416 |
| Cu | 1.31529636  | 2.18329018 | 6.25163153 |
| Cu | 6.36781070  | 6.65654809 | 6.21520728 |
| Cu | 7.60842733  | 4.47895825 | 6.28636084 |

Str 4

Free energy from VASP is -327.43789200 eV

|     |            |            |            |           |           |
|-----|------------|------------|------------|-----------|-----------|
| PBC | 10.223900  | 10.223900  | 20.000000  | 90.000000 | 90.000000 |
|     | 120.000000 |            |            |           |           |
| H   | 2.58149359 | 7.46096329 | 7.15743205 |           |           |

|    |             |            |             |
|----|-------------|------------|-------------|
| H  | -0.00822561 | 2.99471049 | 7.15653662  |
| H  | 5.03260084  | 2.71809775 | 10.30936154 |
| H  | 2.67876924  | 2.19705920 | 10.85056394 |
| H  | 6.44587900  | 1.26397829 | 8.84669494  |
| H  | 2.82460004  | 2.35009567 | 9.07344164  |
| H  | 5.19111038  | 2.38312332 | 7.62736091  |
| H  | 4.40584801  | 0.10641803 | 11.13405165 |
| H  | -0.02775985 | 5.96931766 | 7.15156908  |
| H  | -2.05099768 | 8.84351981 | 9.12140158  |
| C  | 4.64038387  | 1.71633569 | 10.07921237 |
| C  | 3.11739306  | 1.74121050 | 9.95154594  |
| C  | 5.34373823  | 1.15224744 | 8.83817409  |
| O  | 5.03789594  | 0.85781962 | 11.16010645 |
| O  | 2.59216606  | 0.41122231 | 9.87646306  |
| O  | 4.83069989  | 0.11523202 | 8.26017452  |
| Cu | -0.01514696 | 0.08314908 | 19.91756219 |
| Cu | 2.53732583  | 0.08656602 | 19.92209939 |
| Cu | 5.09029425  | 0.09128490 | 19.92880849 |
| Cu | 7.65153399  | 0.08624585 | 19.92677080 |
| Cu | -1.29553695 | 2.29452030 | 19.92578457 |
| Cu | 1.26163495  | 2.29258370 | 19.92949493 |
| Cu | 3.81948320  | 2.29523082 | 19.93355043 |
| Cu | 6.36698064  | 2.29869181 | 19.93224775 |
| Cu | -2.57800831 | 4.51206527 | 19.91521408 |
| Cu | -0.01805515 | 4.51193717 | 19.93938790 |
| Cu | 2.54221372  | 4.50859725 | 19.91389763 |
| Cu | 5.09579915  | 4.51011341 | 19.92089009 |
| Cu | -3.85412922 | 6.72798209 | 19.90947835 |
| Cu | -1.29431519 | 6.72831866 | 19.92655386 |
| Cu | 1.25916616  | 6.72912938 | 19.93124718 |
| Cu | 3.81964672  | 6.72884711 | 19.91610604 |
| Cu | -0.01929354 | 1.55573349 | 2.00934940  |
| Cu | 2.55414962  | 1.55512984 | 2.02905623  |
| Cu | 5.09972560  | 1.55615996 | 2.03461395  |
| Cu | 7.64025088  | 1.55760065 | 2.03196540  |
| Cu | -1.30315665 | 3.76046406 | 2.00525952  |
| Cu | 1.27354768  | 3.76715882 | 2.00715240  |
| Cu | 3.81690812  | 3.77486925 | 2.01799351  |
| Cu | 6.37981004  | 3.77075642 | 2.01632680  |
| Cu | -2.57320555 | 5.98601996 | 1.99995064  |
| Cu | -0.01411509 | 5.99367383 | 2.01486591  |
| Cu | 2.54480978  | 5.98156015 | 1.99694770  |
| Cu | 5.09910568  | 5.98394963 | 2.00215188  |
| Cu | -3.84658904 | 8.19811187 | 2.01102446  |

|    |             |            |            |
|----|-------------|------------|------------|
| Cu | -1.29260861 | 8.20587055 | 2.02148231 |
| Cu | 1.26256026  | 8.21189776 | 2.01600494 |
| Cu | 3.81798737  | 8.20370493 | 2.00551897 |
| Cu | 1.25814823  | 0.82688621 | 4.08209536 |
| Cu | 3.84559197  | 0.82385775 | 4.15104411 |
| Cu | 6.36807575  | 0.81888460 | 4.17956287 |
| Cu | 8.93004150  | 0.81872708 | 4.10262095 |
| Cu | -0.01051824 | 3.04801852 | 4.06756039 |
| Cu | 2.55354192  | 3.01627792 | 4.12409065 |
| Cu | 5.10349655  | 3.03448917 | 4.09342882 |
| Cu | 7.64531100  | 3.01444895 | 4.13798549 |
| Cu | -1.28187122 | 5.22538557 | 4.07047458 |
| Cu | 1.26276310  | 5.24142912 | 4.09399806 |
| Cu | 3.82371348  | 5.25794192 | 4.09626603 |
| Cu | 6.37684378  | 5.24425706 | 4.08326227 |
| Cu | -2.54410990 | 7.44723222 | 4.08811371 |
| Cu | 0.00395568  | 7.46779308 | 4.11607489 |
| Cu | 2.52580884  | 7.44954943 | 4.06373711 |
| Cu | 5.08833289  | 7.46497419 | 4.08001563 |
| Cu | 5.10843165  | 4.54001755 | 6.18040239 |
| Cu | 1.29644984  | 6.67958488 | 6.26451393 |
| Cu | 2.58114469  | 4.48982654 | 6.14181964 |
| Cu | 3.86151658  | 2.33086077 | 6.25167359 |
| Cu | -3.84330445 | 6.72479641 | 6.14472865 |
| Cu | 3.82674417  | 6.72652348 | 6.20196724 |
| Cu | 2.52614505  | 0.07600212 | 6.13335682 |
| Cu | 6.35822006  | 2.32786251 | 6.28066823 |
| Cu | 1.27170279  | 2.29466339 | 6.20448573 |
| Cu | -1.28421031 | 2.29137989 | 6.20351611 |
| Cu | 7.69241968  | 0.05990352 | 6.19276529 |
| Cu | -0.00619201 | 4.48799954 | 6.27312744 |
| Cu | 5.08486259  | 0.01838931 | 6.24948575 |
| Cu | 0.01533529  | 0.07140912 | 6.15351877 |
| Cu | -1.29716585 | 6.66859926 | 6.17273954 |
| Cu | -2.59153629 | 4.51308939 | 6.14424206 |

Str 5

Free energy from VASP is -327.85242000 eV

|            |             |            |             |           |           |
|------------|-------------|------------|-------------|-----------|-----------|
| PBC        | 10.223900   | 10.223900  | 20.000000   | 90.000000 | 90.000000 |
| 120.000000 |             |            |             |           |           |
| H          | 5.47993481  | 1.31077895 | 8.95922969  |           |           |
| H          | -0.03866856 | 7.38160203 | 7.24882144  |           |           |
| H          | 5.80627676  | 3.77715025 | 11.52827660 |           |           |

|    |             |            |             |
|----|-------------|------------|-------------|
| H  | 7.17033289  | 3.55693650 | 9.43746515  |
| H  | 3.64181604  | 2.55697718 | 11.82487868 |
| H  | 7.16398993  | 2.05272929 | 10.40731108 |
| H  | 3.86310907  | 8.18614933 | 7.24440531  |
| H  | 2.52677415  | 5.85765405 | 7.28685928  |
| H  | 2.56481080  | 2.91213436 | 7.25756118  |
| H  | 4.27290585  | 3.87542080 | 9.12511857  |
| C  | 5.39437547  | 3.27701813 | 10.63649369 |
| C  | 6.54248630  | 2.73057144 | 9.79651586  |
| C  | 4.39705156  | 2.20929506 | 11.07986702 |
| O  | 4.59594902  | 4.26301389 | 9.96716508  |
| O  | 6.05920475  | 2.03694307 | 8.62933932  |
| O  | 4.32979769  | 1.08866634 | 10.58675242 |
| Cu | 10.21896655 | 0.00091238 | 19.99962844 |
| Cu | 2.55058134  | 0.00130147 | 19.99989339 |
| Cu | 5.10598141  | 0.00443807 | 0.00710070  |
| Cu | 7.66721504  | 0.00636994 | 0.00636163  |
| Cu | 8.93938352  | 2.21277317 | 0.00068318  |
| Cu | 1.27533965  | 2.21065130 | 0.00091900  |
| Cu | 3.83106052  | 2.21414409 | 0.02370404  |
| Cu | 6.38481418  | 2.21567586 | 0.00789562  |
| Cu | 7.66153340  | 4.42762354 | 19.99805264 |
| Cu | -0.01116468 | 4.42455368 | 19.99051752 |
| Cu | 2.55525844  | 4.42477930 | 0.01565437  |
| Cu | 5.11101317  | 4.42493913 | 0.00464138  |
| Cu | 6.38729412  | 6.64100176 | 19.99398626 |
| Cu | -1.28537230 | 6.64183038 | 19.99557490 |
| Cu | 1.27272166  | 6.64326437 | 0.00930364  |
| Cu | 3.83137488  | 6.64251450 | 0.00910089  |
| Cu | -0.00772280 | 1.47702599 | 2.08257177  |
| Cu | 2.54634131  | 1.47445580 | 2.10294001  |
| Cu | 5.11309648  | 1.47709482 | 2.11358105  |
| Cu | 7.65346607  | 1.47844845 | 2.10185965  |
| Cu | -1.29042255 | 3.68499033 | 2.09843592  |
| Cu | 1.26423922  | 3.69012992 | 2.07900059  |
| Cu | 3.83699649  | 3.69227989 | 2.10609140  |
| Cu | 6.38200935  | 3.68618003 | 2.10559121  |
| Cu | -2.56631102 | 5.90176849 | 2.08015645  |
| Cu | -0.00796378 | 5.89677681 | 2.07306492  |
| Cu | 2.54747235  | 5.90220970 | 2.09632154  |
| Cu | 5.10313268  | 5.90218355 | 2.08697255  |
| Cu | -3.84300908 | 8.11736575 | 2.09222721  |
| Cu | -1.28505331 | 8.11939320 | 2.08707812  |
| Cu | 1.27096633  | 8.12965638 | 2.09072467  |

|    |             |            |            |
|----|-------------|------------|------------|
| Cu | 3.82737586  | 8.11731475 | 2.09198650 |
| Cu | 1.25767710  | 0.73620277 | 4.19068424 |
| Cu | 3.82968916  | 0.73862668 | 4.18107506 |
| Cu | 6.38981619  | 0.73539903 | 4.24185624 |
| Cu | 8.93924039  | 0.73686019 | 4.15404604 |
| Cu | 0.00844161  | 2.94278135 | 4.16729757 |
| Cu | 2.54889752  | 2.97466968 | 4.15290952 |
| Cu | 5.10038749  | 2.94094288 | 4.21205259 |
| Cu | 7.64456287  | 2.93997531 | 4.19430936 |
| Cu | -1.28373301 | 5.17669887 | 4.16303445 |
| Cu | 1.27605255  | 5.16476529 | 4.18537104 |
| Cu | 3.81698109  | 5.17959391 | 4.20284077 |
| Cu | 6.38059181  | 5.16766800 | 4.15774719 |
| Cu | -2.55217374 | 7.38096168 | 4.16368616 |
| Cu | 0.00974960  | 7.36269591 | 4.14276606 |
| Cu | 2.53461708  | 7.37771348 | 4.17969709 |
| Cu | 5.08334814  | 7.36758998 | 4.17694329 |
| Cu | -1.26985713 | 2.22689027 | 6.22120578 |
| Cu | -0.03724808 | 4.40054444 | 6.21427089 |
| Cu | 3.82021028  | 6.64322726 | 6.39668800 |
| Cu | 2.56028915  | 4.41668199 | 6.37554659 |
| Cu | -3.82423901 | 6.63150358 | 6.21753171 |
| Cu | 1.28140813  | 2.21253930 | 6.28985788 |
| Cu | -5.10769476 | 8.85190020 | 6.28959142 |
| Cu | -0.01812424 | 8.81237924 | 6.25351389 |
| Cu | 1.25093142  | 6.61438502 | 6.36246027 |
| Cu | 3.80682008  | 2.20831746 | 6.26664706 |
| Cu | 5.13756951  | 4.44913203 | 6.21854595 |
| Cu | 6.37787412  | 2.20996303 | 6.36573470 |
| Cu | -2.55713213 | 4.43593781 | 6.22800876 |
| Cu | -2.57977138 | 8.83735774 | 6.22705852 |
| Cu | -1.28151202 | 6.63338620 | 6.28455607 |
| Cu | 7.69858053  | 0.01679387 | 6.27682993 |

Str 6

Free energy from VASP is -327.19932700 eV

|            |             |            |             |           |           |
|------------|-------------|------------|-------------|-----------|-----------|
| PBC        | 10.223900   | 10.223900  | 20.000000   | 90.000000 | 90.000000 |
| 120.000000 |             |            |             |           |           |
| H          | 3.15365806  | 6.50222251 | 8.71723547  |           |           |
| H          | -2.65980174 | 7.44632140 | 7.24320863  |           |           |
| H          | 5.03035693  | 5.75584961 | 10.07817072 |           |           |
| H          | 5.32779114  | 3.40385137 | 10.79396633 |           |           |
| H          | 3.11242521  | 2.91633503 | 9.10481922  |           |           |



|    |             |            |             |
|----|-------------|------------|-------------|
| H  | 3.67520215  | 3.82803283 | 11.28107152 |
| H  | 0.09383796  | 7.44348343 | 7.25696378  |
| H  | -1.32161436 | 5.11814358 | 7.28082904  |
| H  | 5.67796978  | 3.44489789 | 8.41841504  |
| H  | 0.01577563  | 2.85203234 | 7.21570408  |
| C  | 4.40104288  | 4.97416835 | 9.64714341  |
| C  | 4.33631376  | 3.67226235 | 10.40242159 |
| C  | 3.28149873  | 5.41733246 | 8.90325274  |
| O  | 5.67097127  | 4.40494284 | 8.19762169  |
| O  | 3.87893990  | 2.56975245 | 9.61774163  |
| O  | 2.41443188  | 4.59733188 | 8.39263537  |
| Cu | -0.00209900 | 0.00009436 | -0.01220240 |
| Cu | 2.55285519  | 0.00264962 | -0.00345039 |
| Cu | 5.11339288  | 0.00102786 | -0.00525913 |
| Cu | 7.66693934  | 0.00133804 | -0.01146299 |
| Cu | 8.94609212  | 2.21074733 | -0.00694757 |
| Cu | 1.27571768  | 2.21335743 | 0.00001113  |
| Cu | 3.83364800  | 2.21431793 | -0.00470114 |
| Cu | 6.38957439  | 2.21182411 | -0.00926050 |
| Cu | -2.56154129 | 4.42556983 | -0.00345792 |
| Cu | 0.00118887  | 4.42448051 | 0.00698450  |
| Cu | 2.55950206  | 4.42820105 | -0.00109482 |
| Cu | 5.10862067  | 4.42903064 | 0.00374112  |
| Cu | 6.38477003  | 6.63912235 | 0.00347452  |
| Cu | -1.27629593 | 6.64023449 | 0.01239292  |
| Cu | 1.27840243  | 6.64097727 | 0.00518439  |
| Cu | 3.83207697  | 6.63838931 | -0.00329319 |
| Cu | 0.00235328  | 1.47795887 | 2.07446788  |
| Cu | 2.56070296  | 1.48494600 | 2.09384332  |
| Cu | 5.10755470  | 1.48421586 | 2.08416136  |
| Cu | 7.66021911  | 1.48044225 | 2.07671401  |
| Cu | -1.28425385 | 3.69771858 | 2.08029014  |
| Cu | 1.28442749  | 3.69193670 | 2.09176861  |
| Cu | 3.82545511  | 3.68839586 | 2.09844173  |
| Cu | 6.38818350  | 3.68767261 | 2.08772703  |
| Cu | -2.56290889 | 5.89307577 | 2.09228704  |
| Cu | 0.00140507  | 5.89345584 | 2.09901687  |
| Cu | 2.55407872  | 5.88967946 | 2.10230763  |
| Cu | 5.10118882  | 5.89272224 | 2.09571768  |
| Cu | -3.83289815 | 8.11845474 | 2.07813003  |
| Cu | -1.28417971 | 8.12487870 | 2.07446972  |
| Cu | 1.27173018  | 8.11182704 | 2.07654157  |
| Cu | 3.82869405  | 8.11414245 | 2.07731238  |
| Cu | 1.27901125  | 0.73822316 | 4.16072502  |

|    |             |            |            |
|----|-------------|------------|------------|
| Cu | 3.83163948  | 0.72743044 | 4.17888268 |
| Cu | 6.37651571  | 0.72510217 | 4.14516451 |
| Cu | 8.94337489  | 0.74819705 | 4.14490772 |
| Cu | -0.01105601 | 2.97017475 | 4.13172225 |
| Cu | 2.54341991  | 2.96978888 | 4.20452524 |
| Cu | 5.10768370  | 2.96331070 | 4.16610478 |
| Cu | 7.68060383  | 2.97089861 | 4.17619886 |
| Cu | -1.28652764 | 5.18127082 | 4.20506269 |
| Cu | 1.26073386  | 5.15480234 | 4.23826963 |
| Cu | 3.82364584  | 5.14335394 | 4.22398146 |
| Cu | 6.38258422  | 5.16449986 | 4.20427303 |
| Cu | -2.53955264 | 7.36646159 | 4.15010433 |
| Cu | -0.03028630 | 7.36950230 | 4.15165006 |
| Cu | 2.53446963  | 7.36833459 | 4.14873950 |
| Cu | 5.11742220  | 7.37506708 | 4.14795605 |
| Cu | 2.53441773  | 0.00740079 | 6.26672301 |
| Cu | 3.82652386  | 6.67758820 | 6.19842302 |
| Cu | -3.84134644 | 6.69506889 | 6.23932245 |
| Cu | 3.82473603  | 2.18763087 | 6.21073790 |
| Cu | 5.12172355  | 0.00476399 | 6.27454695 |
| Cu | 8.94323279  | 2.17631159 | 6.27301427 |
| Cu | 6.40366278  | 2.17921698 | 6.17908855 |
| Cu | 2.52012955  | 4.43862804 | 6.35895301 |
| Cu | 7.64256424  | 4.41779376 | 6.32756025 |
| Cu | 7.67763176  | 0.00842050 | 6.21162416 |
| Cu | -1.28414327 | 6.65166409 | 6.50331559 |
| Cu | 1.25397203  | 2.19564080 | 6.23963004 |
| Cu | 1.25453008  | 6.68215553 | 6.23939969 |
| Cu | 5.08513355  | 8.84811821 | 6.21826196 |
| Cu | 5.11430334  | 4.42315627 | 6.29092466 |
| Cu | -0.06836232 | 4.38311150 | 6.34644907 |

Str 7

Free energy from VASP is -328.59621000 eV

|            |             |            |             |           |           |
|------------|-------------|------------|-------------|-----------|-----------|
| PBC        | 10.223900   | 10.223900  | 20.000000   | 90.000000 | 90.000000 |
| 120.000000 |             |            |             |           |           |
| H          | 5.04854718  | 2.88640712 | 7.19599296  |           |           |
| H          | 7.68269308  | 2.78025709 | 7.25718725  |           |           |
| H          | 5.85779102  | 0.56763981 | 8.97829260  |           |           |
| H          | 3.48764166  | 0.54838325 | 10.18125761 |           |           |
| H          | -3.18707668 | 5.55298773 | 8.55097718  |           |           |
| H          | 3.57710384  | 1.69579049 | 8.82012340  |           |           |
| H          | 0.96639197  | 7.03717182 | 8.56236093  |           |           |

|    |             |            |             |
|----|-------------|------------|-------------|
| H  | 0.07936616  | 2.94562140 | 7.19371641  |
| H  | 2.62967707  | 5.87358160 | 7.19783185  |
| H  | -2.34986478 | 7.84466292 | 8.52999078  |
| C  | 4.95532846  | 0.02361972 | 8.68817152  |
| C  | 3.63628613  | 0.63121350 | 9.08857888  |
| C  | -0.04744488 | 7.48920231 | 8.55114497  |
| O  | 6.53259311  | 5.38655647 | 7.73222331  |
| O  | -2.59265692 | 8.81571900 | 8.44816199  |
| O  | -1.07040194 | 6.67120932 | 8.43650886  |
| Cu | -5.10155146 | 8.84707423 | 19.97537045 |
| Cu | -2.54953494 | 8.84939634 | 0.01109830  |
| Cu | -0.00503873 | 8.85035672 | 0.01175499  |
| Cu | 7.66651178  | 0.00133332 | 0.00271532  |
| Cu | 8.94342565  | 2.21345877 | 0.00432269  |
| Cu | 1.28572412  | 2.20816466 | 19.97967693 |
| Cu | 3.83624209  | 2.20695569 | 19.98720233 |
| Cu | 6.39233319  | 2.20914244 | 0.00948646  |
| Cu | -2.55367340 | 4.43235782 | 19.99955256 |
| Cu | 0.00011116  | 4.43182505 | 19.99285786 |
| Cu | 2.56096979  | 4.42997267 | 19.96513615 |
| Cu | 5.11424078  | 4.42853770 | 19.98592878 |
| Cu | -3.82776658 | 6.64121000 | 19.99829688 |
| Cu | -1.27816267 | 6.64546147 | 0.01593999  |
| Cu | 1.27707592  | 6.64166908 | 0.00072243  |
| Cu | 3.83809200  | 6.63843005 | 19.97603757 |
| Cu | 0.01992046  | 1.46381273 | 2.05949735  |
| Cu | 2.57031822  | 1.47182722 | 2.09111109  |
| Cu | 5.10316114  | 1.47224907 | 2.10267178  |
| Cu | 7.66288269  | 1.47323573 | 2.10065218  |
| Cu | -1.27983760 | 3.69973177 | 2.07712785  |
| Cu | 1.28626519  | 3.68347844 | 2.04833989  |
| Cu | 3.83869220  | 3.68211561 | 2.05803847  |
| Cu | 6.39706498  | 3.69462149 | 2.08067555  |
| Cu | -2.55501440 | 5.90551522 | 2.12146026  |
| Cu | -0.00864219 | 5.91031376 | 2.10020397  |
| Cu | 2.56631544  | 5.89613297 | 2.05985944  |
| Cu | 5.12615629  | 5.90123128 | 2.06841868  |
| Cu | -3.81879500 | 8.10984864 | 2.10014948  |
| Cu | -1.27596387 | 8.11227883 | 2.13521698  |
| Cu | 1.26461918  | 8.11849796 | 2.09182204  |
| Cu | 3.85205708  | 8.11842906 | 2.06191353  |
| Cu | 1.30809152  | 0.73365613 | 4.16984714  |
| Cu | 3.84935844  | 0.71579238 | 4.23931720  |
| Cu | 6.36420586  | 0.73226553 | 4.21155218  |

|    |             |            |            |
|----|-------------|------------|------------|
| Cu | 8.96335329  | 0.75538211 | 4.14364511 |
| Cu | -0.00331073 | 2.94284458 | 4.09545562 |
| Cu | 2.56362490  | 2.96351652 | 4.15660139 |
| Cu | 5.13775218  | 2.95631738 | 4.14223945 |
| Cu | 7.67670813  | 2.95912350 | 4.18463915 |
| Cu | -1.28516296 | 5.15733255 | 4.22940141 |
| Cu | 1.27979592  | 5.15427257 | 4.12384228 |
| Cu | 3.86153588  | 5.14909881 | 4.14161455 |
| Cu | 6.39724754  | 5.14575197 | 4.21058769 |
| Cu | -2.54020546 | 7.37403587 | 4.24511163 |
| Cu | 0.00733715  | 7.37324111 | 4.26070519 |
| Cu | 2.56673900  | 7.38402121 | 4.10085814 |
| Cu | 5.12822478  | 7.35381794 | 4.16796409 |
| Cu | 5.09539736  | 8.84927226 | 6.17990286 |
| Cu | 1.27650058  | 2.23075340 | 6.20718001 |
| Cu | 5.06994307  | 4.39608843 | 6.32368861 |
| Cu | 3.84116775  | 2.23841282 | 6.20499631 |
| Cu | 6.36187623  | 6.68575084 | 6.26376738 |
| Cu | -1.25659406 | 2.20040324 | 6.33116844 |
| Cu | 3.83416389  | 6.64800454 | 6.22233027 |
| Cu | 6.39487133  | 2.19169999 | 6.31616573 |
| Cu | 2.59475110  | 8.85144737 | 6.17069338 |
| Cu | -1.23750876 | 6.56615982 | 6.32585100 |
| Cu | 2.56524579  | 4.43743528 | 6.25080908 |
| Cu | 2.53571974  | 0.04694405 | 6.30531699 |
| Cu | 0.05192298  | 8.83268864 | 6.44333624 |
| Cu | 7.68414287  | 4.36798450 | 6.37066857 |
| Cu | 0.04373227  | 4.38453919 | 6.21790861 |
| Cu | 1.35764355  | 6.61837267 | 6.22195264 |

Str 8

Free energy from VASP is -327.94651900 eV

PBC 10.223900 10.223900 20.000000 90.000000 90.000000

120.000000

|   |             |            |             |
|---|-------------|------------|-------------|
| H | 5.19622623  | 5.91530916 | 7.22780059  |
| H | 1.36520298  | 3.44274997 | 7.57973461  |
| H | -0.74424030 | 3.60203857 | 11.04435665 |
| H | 0.83077527  | 1.85284205 | 10.46526275 |
| H | 2.53966301  | 5.93002533 | 7.26261553  |
| H | 0.04471047  | 1.62841715 | 8.87510107  |
| H | -2.28212292 | 4.59177035 | 9.47769167  |
| H | 2.26623401  | 2.33191957 | 8.72358854  |
| H | -0.00715570 | 7.42933614 | 7.25192249  |

|    |             |            |             |
|----|-------------|------------|-------------|
| H  | 3.90062988  | 0.85119517 | 8.51798654  |
| C  | -0.63826150 | 3.33902179 | 9.99117011  |
| C  | 0.42528503  | 2.38132333 | 9.59135013  |
| C  | -1.50240558 | 3.90640540 | 9.12379117  |
| O  | 3.18051822  | 1.25574753 | 7.99618052  |
| O  | 1.57644860  | 3.06040043 | 8.95754542  |
| O  | -1.48527971 | 3.71310445 | 7.78612353  |
| Cu | 0.00531367  | 0.01033350 | 0.00784008  |
| Cu | 2.55302730  | 0.00855577 | 0.01596440  |
| Cu | 5.10804733  | 0.00998129 | 0.01716419  |
| Cu | 7.66961029  | 0.01264527 | -0.00442437 |
| Cu | 8.94791189  | 2.22084534 | 0.00561829  |
| Cu | 1.27745774  | 2.21693845 | 0.00418319  |
| Cu | 3.83386698  | 2.21530621 | 0.00590007  |
| Cu | 6.39015729  | 2.22015681 | -0.00047643 |
| Cu | -2.55750466 | 4.43415290 | 0.01462360  |
| Cu | -0.00226768 | 4.42726715 | 0.00021655  |
| Cu | 2.55589919  | 4.43255205 | 0.00589684  |
| Cu | 5.11473501  | 4.43555067 | 0.00807846  |
| Cu | 6.39036870  | 6.64954224 | 0.01383176  |
| Cu | -1.28163465 | 6.65090005 | 0.00354479  |
| Cu | 1.27813919  | 6.64983112 | 0.00727605  |
| Cu | 3.83536922  | 6.64670341 | 0.02994852  |
| Cu | 0.00637339  | 1.48340146 | 2.09871079  |
| Cu | 2.56247891  | 1.48754473 | 2.10666687  |
| Cu | 5.11061516  | 1.49372603 | 2.10617678  |
| Cu | 7.66894898  | 1.49257406 | 2.09524037  |
| Cu | -1.28339152 | 3.71181389 | 2.09139716  |
| Cu | 1.28304436  | 3.69808534 | 2.09550318  |
| Cu | 3.84001106  | 3.69814719 | 2.08323354  |
| Cu | 6.38454647  | 3.69365296 | 2.10768668  |
| Cu | -2.55012971 | 5.92632451 | 2.11165789  |
| Cu | -0.00760830 | 5.91090466 | 2.07712920  |
| Cu | 2.54996259  | 5.91256360 | 2.09507382  |
| Cu | 5.12144192  | 5.91150360 | 2.10604181  |
| Cu | -3.83062802 | 8.12323812 | 2.11249957  |
| Cu | -1.28371191 | 8.13076680 | 2.11227683  |
| Cu | 1.28967406  | 8.12883146 | 2.08118440  |
| Cu | 3.83227704  | 8.13783537 | 2.09717169  |
| Cu | 1.30415197  | 0.75064834 | 4.18462524  |
| Cu | 3.83890091  | 0.75221979 | 4.21475829  |
| Cu | 6.39081701  | 0.74368930 | 4.15878492  |
| Cu | 8.95260511  | 0.77677097 | 4.18447868  |
| Cu | -0.01877442 | 2.98105668 | 4.16017450  |

|    |             |            |            |
|----|-------------|------------|------------|
| Cu | 2.58052340  | 2.98401874 | 4.18109342 |
| Cu | 5.09540408  | 2.98174337 | 4.22162744 |
| Cu | 7.67725216  | 2.98398528 | 4.18803389 |
| Cu | -1.27166059 | 5.19479224 | 4.21507955 |
| Cu | 1.25836819  | 5.18763734 | 4.18423712 |
| Cu | 3.82372402  | 5.17898579 | 4.16441360 |
| Cu | 6.40888109  | 5.18341205 | 4.18230554 |
| Cu | -2.55825376 | 7.42226544 | 4.25131190 |
| Cu | 0.02499342  | 7.38415461 | 4.13493577 |
| Cu | 2.56880460  | 7.37466340 | 4.19298178 |
| Cu | 5.09059660  | 7.38290273 | 4.17395725 |
| Cu | -1.24745603 | 6.70596801 | 6.26208895 |
| Cu | 5.11404970  | 8.88182861 | 6.21197421 |
| Cu | 2.51595051  | 4.44696258 | 6.31608244 |
| Cu | 5.12079476  | 4.45903984 | 6.27219100 |
| Cu | 6.39212609  | 2.21133679 | 6.20435496 |
| Cu | 8.94051849  | 2.17967681 | 6.31203164 |
| Cu | 0.07224868  | 8.84195583 | 6.23170382 |
| Cu | 1.29483819  | 6.67781525 | 6.37049077 |
| Cu | 2.53903958  | 0.05037101 | 6.39538130 |
| Cu | 7.62951036  | 4.50010137 | 6.27611367 |
| Cu | 0.02847358  | 4.43924544 | 6.31529641 |
| Cu | 3.88405505  | 2.25057139 | 6.32800079 |
| Cu | 1.25326757  | 2.27626025 | 6.16053854 |
| Cu | -3.83376990 | 6.69899623 | 6.29526340 |
| Cu | 3.84139311  | 6.64807256 | 6.37851008 |
| Cu | 7.70571386  | 0.02590892 | 6.22323841 |

Str 9

Free energy from VASP is -328.59621000 eV

PBC 10.223900 10.223900 20.000000 90.000000 90.000000  
120.000000

|   |             |            |             |
|---|-------------|------------|-------------|
| H | 5.04854718  | 2.88640712 | 7.19599296  |
| H | 7.68269308  | 2.78025709 | 7.25718725  |
| H | 5.85779102  | 0.56763981 | 8.97829260  |
| H | 3.48764166  | 0.54838325 | 10.18125761 |
| H | -3.18707668 | 5.55298773 | 8.55097718  |
| H | 3.57710384  | 1.69579049 | 8.82012340  |
| H | 0.96639197  | 7.03717182 | 8.56236093  |
| H | 0.07936616  | 2.94562140 | 7.19371641  |
| H | 2.62967707  | 5.87358160 | 7.19783185  |
| H | -2.34986478 | 7.84466292 | 8.52999078  |
| C | 4.95532846  | 0.02361972 | 8.68817152  |

|    |             |            |             |
|----|-------------|------------|-------------|
| C  | 3.63628613  | 0.63121350 | 9.08857888  |
| C  | -0.04744488 | 7.48920231 | 8.55114497  |
| O  | 6.53259311  | 5.38655647 | 7.73222331  |
| O  | -2.59265692 | 8.81571900 | 8.44816199  |
| O  | -1.07040194 | 6.67120932 | 8.43650886  |
| Cu | -5.10155146 | 8.84707423 | 19.97537045 |
| Cu | -2.54953494 | 8.84939634 | 0.01109830  |
| Cu | -0.00503873 | 8.85035672 | 0.01175499  |
| Cu | 7.66651178  | 0.00133332 | 0.00271532  |
| Cu | 8.94342565  | 2.21345877 | 0.00432269  |
| Cu | 1.28572412  | 2.20816466 | 19.97967693 |
| Cu | 3.83624209  | 2.20695569 | 19.98720233 |
| Cu | 6.39233319  | 2.20914244 | 0.00948646  |
| Cu | -2.55367340 | 4.43235782 | 19.99955256 |
| Cu | 0.00011116  | 4.43182505 | 19.99285786 |
| Cu | 2.56096979  | 4.42997267 | 19.96513615 |
| Cu | 5.11424078  | 4.42853770 | 19.98592878 |
| Cu | -3.82776658 | 6.64121000 | 19.99829688 |
| Cu | -1.27816267 | 6.64546147 | 0.01593999  |
| Cu | 1.27707592  | 6.64166908 | 0.00072243  |
| Cu | 3.83809200  | 6.63843005 | 19.97603757 |
| Cu | 0.01992046  | 1.46381273 | 2.05949735  |
| Cu | 2.57031822  | 1.47182722 | 2.09111109  |
| Cu | 5.10316114  | 1.47224907 | 2.10267178  |
| Cu | 7.66288269  | 1.47323573 | 2.10065218  |
| Cu | -1.27983760 | 3.69973177 | 2.07712785  |
| Cu | 1.28626519  | 3.68347844 | 2.04833989  |
| Cu | 3.83869220  | 3.68211561 | 2.05803847  |
| Cu | 6.39706498  | 3.69462149 | 2.08067555  |
| Cu | -2.55501440 | 5.90551522 | 2.12146026  |
| Cu | -0.00864219 | 5.91031376 | 2.10020397  |
| Cu | 2.56631544  | 5.89613297 | 2.05985944  |
| Cu | 5.12615629  | 5.90123128 | 2.06841868  |
| Cu | -3.81879500 | 8.10984864 | 2.10014948  |
| Cu | -1.27596387 | 8.11227883 | 2.13521698  |
| Cu | 1.26461918  | 8.11849796 | 2.09182204  |
| Cu | 3.85205708  | 8.11842906 | 2.06191353  |
| Cu | 1.30809152  | 0.73365613 | 4.16984714  |
| Cu | 3.84935844  | 0.71579238 | 4.23931720  |
| Cu | 6.36420586  | 0.73226553 | 4.21155218  |
| Cu | 8.96335329  | 0.75538211 | 4.14364511  |
| Cu | -0.00331073 | 2.94284458 | 4.09545562  |
| Cu | 2.56362490  | 2.96351652 | 4.15660139  |
| Cu | 5.13775218  | 2.95631738 | 4.14223945  |

|    |             |            |            |
|----|-------------|------------|------------|
| Cu | 7.67670813  | 2.95912350 | 4.18463915 |
| Cu | -1.28516296 | 5.15733255 | 4.22940141 |
| Cu | 1.27979592  | 5.15427257 | 4.12384228 |
| Cu | 3.86153588  | 5.14909881 | 4.14161455 |
| Cu | 6.39724754  | 5.14575197 | 4.21058769 |
| Cu | -2.54020546 | 7.37403587 | 4.24511163 |
| Cu | 0.00733715  | 7.37324111 | 4.26070519 |
| Cu | 2.56673900  | 7.38402121 | 4.10085814 |
| Cu | 5.12822478  | 7.35381794 | 4.16796409 |
| Cu | 5.09539736  | 8.84927226 | 6.17990286 |
| Cu | 1.27650058  | 2.23075340 | 6.20718001 |
| Cu | 5.06994307  | 4.39608843 | 6.32368861 |
| Cu | 3.84116775  | 2.23841282 | 6.20499631 |
| Cu | 6.36187623  | 6.68575084 | 6.26376738 |
| Cu | -1.25659406 | 2.20040324 | 6.33116844 |
| Cu | 3.83416389  | 6.64800454 | 6.22233027 |
| Cu | 6.39487133  | 2.19169999 | 6.31616573 |
| Cu | 2.59475110  | 8.85144737 | 6.17069338 |
| Cu | -1.23750876 | 6.56615982 | 6.32585100 |
| Cu | 2.56524579  | 4.43743528 | 6.25080908 |
| Cu | 2.53571974  | 0.04694405 | 6.30531699 |
| Cu | 0.05192298  | 8.83268864 | 6.44333624 |
| Cu | 7.68414287  | 4.36798450 | 6.37066857 |
| Cu | 0.04373227  | 4.38453919 | 6.21790861 |
| Cu | 1.35764355  | 6.61837267 | 6.22195264 |

Str 10

Free energy from VASP is -328.37892700 eV

PBC 10.223900 10.223900 20.000000 90.000000 90.000000  
120.000000

|   |             |            |             |
|---|-------------|------------|-------------|
| H | 4.42686535  | 4.46797073 | 8.81027586  |
| H | -2.57392591 | 7.37878826 | 7.23746711  |
| H | -0.39633337 | 3.77590532 | 9.56049525  |
| H | 1.95032209  | 4.25312700 | 10.68193789 |
| H | 0.58314060  | 3.59943336 | 7.64523063  |
| H | 2.00891339  | 2.91673131 | 9.49843519  |
| H | -0.90064353 | 6.05268745 | 8.83043206  |
| H | 5.66909786  | 3.47928404 | 8.74736891  |
| H | 2.56891771  | 1.52161883 | 7.27339427  |
| H | 2.40153980  | 5.62620403 | 8.71381495  |
| C | 0.42923298  | 4.36856446 | 9.16032449  |
| C | 1.81734672  | 3.99405347 | 9.61402669  |
| C | 0.15060436  | 5.71367563 | 8.84828978  |



|    |             |            |             |
|----|-------------|------------|-------------|
| O  | 5.38695191  | 4.38518401 | 8.52473185  |
| O  | 2.80526133  | 4.70435792 | 8.83736088  |
| O  | 1.07317522  | 6.57483880 | 8.51552441  |
| Cu | -0.00898161 | 0.00447285 | -0.00298502 |
| Cu | 2.55453440  | 0.00613061 | 0.01082327  |
| Cu | 5.11937827  | 0.00451293 | -0.00645644 |
| Cu | 7.66530953  | 0.00362141 | -0.00382528 |
| Cu | 8.94044686  | 2.21926729 | -0.00201283 |
| Cu | 1.27573239  | 2.22197720 | 0.01604182  |
| Cu | 3.83336736  | 2.22096078 | 0.00788944  |
| Cu | 6.39240699  | 2.21982466 | -0.00781698 |
| Cu | -2.55834495 | 4.42708380 | 0.00377108  |
| Cu | -0.00136717 | 4.43107181 | 0.01165193  |
| Cu | 2.55412317  | 4.43476544 | 0.02007252  |
| Cu | 5.11155156  | 4.43091004 | 0.00198059  |
| Cu | 6.38679829  | 6.63882963 | 0.00819946  |
| Cu | -1.27668903 | 6.63840431 | 0.00872677  |
| Cu | 1.28024776  | 6.64357786 | 0.01137089  |
| Cu | 3.82781915  | 6.64216060 | 0.00496623  |
| Cu | -0.00302113 | 1.48424503 | 2.08555918  |
| Cu | 2.55103842  | 1.48733746 | 2.09535288  |
| Cu | 5.10862152  | 1.48983903 | 2.08486797  |
| Cu | 7.66350801  | 1.48126439 | 2.07632549  |
| Cu | -1.27594105 | 3.69717659 | 2.09578048  |
| Cu | 1.27208051  | 3.70483866 | 2.11424268  |
| Cu | 3.83446681  | 3.69698902 | 2.09925483  |
| Cu | 6.38022902  | 3.69562988 | 2.09742365  |
| Cu | -2.55943770 | 5.90179203 | 2.09596353  |
| Cu | 0.00647565  | 5.90616128 | 2.10801669  |
| Cu | 2.55406614  | 5.90168680 | 2.12670181  |
| Cu | 5.09863031  | 5.90360170 | 2.09658090  |
| Cu | -3.84674378 | 8.12774944 | 2.06990115  |
| Cu | -1.26842790 | 8.11860990 | 2.07299365  |
| Cu | 1.27164291  | 8.11665106 | 2.09095730  |
| Cu | 3.82230028  | 8.11599446 | 2.09147208  |
| Cu | 1.27947658  | 0.75760453 | 4.19017905  |
| Cu | 3.81712227  | 0.73419662 | 4.15583350  |
| Cu | 6.38085156  | 0.74584184 | 4.14259655  |
| Cu | 8.93914747  | 0.74665248 | 4.14654639  |
| Cu | 0.01217160  | 2.94953504 | 4.18728300  |
| Cu | 2.54226924  | 2.96735287 | 4.18435454  |
| Cu | 5.08679505  | 2.96333589 | 4.20417867  |
| Cu | 7.66457330  | 2.96146167 | 4.14322813  |
| Cu | -1.27389341 | 5.17536529 | 4.18151386  |

|    |             |            |            |
|----|-------------|------------|------------|
| Cu | 1.27422291  | 5.18372025 | 4.25183829 |
| Cu | 3.83922825  | 5.15339533 | 4.22330221 |
| Cu | 6.37678592  | 5.18361520 | 4.18573975 |
| Cu | -2.56731480 | 7.41871025 | 4.12139589 |
| Cu | -0.00653208 | 7.37520086 | 4.19928056 |
| Cu | 2.52902257  | 7.38083663 | 4.19036971 |
| Cu | 5.11665612  | 7.38931608 | 4.15587526 |
| Cu | 6.39583707  | 2.20602516 | 6.20295262 |
| Cu | 10.18016415 | 0.02583391 | 6.21658116 |
| Cu | 1.24265703  | 2.25733501 | 6.40165009 |
| Cu | 2.53386584  | 0.03104204 | 6.37391390 |
| Cu | 5.14186046  | 4.43717631 | 6.34108176 |
| Cu | 3.83899894  | 6.68206899 | 6.20279837 |
| Cu | 7.66311013  | 0.02885902 | 6.23354564 |
| Cu | 2.56895775  | 4.45156064 | 6.29784041 |
| Cu | 1.25769590  | 6.70252980 | 6.37385967 |
| Cu | 3.81707285  | 2.19892144 | 6.25754891 |
| Cu | -3.83930384 | 6.69431873 | 6.25146161 |
| Cu | 7.66687857  | 4.41143307 | 6.19467939 |
| Cu | -0.03858189 | 4.40691380 | 6.29752882 |
| Cu | 5.12332406  | 0.03703761 | 6.20620365 |
| Cu | 8.92127084  | 2.20742451 | 6.22906218 |
| Cu | -1.33798055 | 6.66518620 | 6.22430003 |

Str 11

Free energy from VASP is -329.06902500 eV

|            |            |            |             |           |           |
|------------|------------|------------|-------------|-----------|-----------|
| PBC        | 10.223900  | 10.223900  | 20.000000   | 90.000000 | 90.000000 |
| 120.000000 |            |            |             |           |           |
| H          | 7.62560968 | 1.44938853 | 7.24604306  |           |           |
| H          | 4.75457599 | 6.04799064 | 9.54405999  |           |           |
| H          | 2.78734073 | 5.56520417 | 11.10616243 |           |           |
| H          | 1.29316137 | 3.84601557 | 10.13939578 |           |           |
| H          | 1.07918266 | 6.10969786 | 11.06760754 |           |           |
| H          | 0.67397768 | 4.98710737 | 8.91853772  |           |           |
| H          | 1.52674444 | 7.70366402 | 9.23760343  |           |           |
| H          | 5.66925824 | 4.97706529 | 8.84576623  |           |           |
| H          | 0.00136672 | 2.96453387 | 7.23225956  |           |           |
| H          | 3.50646460 | 4.49817020 | 8.98180070  |           |           |
| C          | 1.96137944 | 5.87588176 | 10.45036426 |           |           |
| C          | 1.55931413 | 4.71638170 | 9.51629613  |           |           |
| C          | 2.35570311 | 7.11337662 | 9.69586122  |           |           |
| O          | 4.97979741 | 5.08430560 | 9.53301278  |           |           |
| O          | 2.59020087 | 4.34804881 | 8.58902887  |           |           |

|    |             |            |             |
|----|-------------|------------|-------------|
| O  | 3.51691369  | 7.47897028 | 9.53852530  |
| Cu | -5.10738779 | 8.85211422 | 19.97799833 |
| Cu | 2.55884316  | 0.00267511 | 19.98068642 |
| Cu | 5.11392196  | 0.00201962 | 19.97958121 |
| Cu | 7.66980029  | 0.00143551 | 19.98148403 |
| Cu | -1.27451025 | 2.21563805 | 19.98762102 |
| Cu | 1.28473044  | 2.21958645 | 19.99817581 |
| Cu | 3.83347560  | 2.21998062 | 19.99202549 |
| Cu | 6.39118575  | 2.21515831 | 19.98338109 |
| Cu | -2.55624852 | 4.43263585 | 19.97907811 |
| Cu | 0.00884607  | 4.42976822 | 19.99631172 |
| Cu | 2.56130978  | 4.43014771 | 0.01325832  |
| Cu | 5.10842671  | 4.42999943 | 19.99478449 |
| Cu | -3.83415532 | 6.64219110 | 19.98156646 |
| Cu | -1.27496851 | 6.64389263 | 19.97914938 |
| Cu | 1.28370925  | 6.63851160 | 19.98827414 |
| Cu | 3.83470521  | 6.63744215 | 19.99252090 |
| Cu | 0.00287356  | 1.47589175 | 2.06146357  |
| Cu | 2.55914877  | 1.48329748 | 2.08415623  |
| Cu | 5.11254062  | 1.48048880 | 2.06196040  |
| Cu | 7.67085066  | 1.47804340 | 2.06220887  |
| Cu | -1.27710545 | 3.69325414 | 2.05881821  |
| Cu | 1.28119345  | 3.69122773 | 2.09676003  |
| Cu | 3.83507775  | 3.68613831 | 2.10320925  |
| Cu | 6.39231812  | 3.68840771 | 2.06569256  |
| Cu | -2.55099170 | 5.90351972 | 2.05869029  |
| Cu | 0.00805124  | 5.90373396 | 2.07771377  |
| Cu | 2.55398578  | 5.90654905 | 2.09965009  |
| Cu | 5.10641908  | 5.90205540 | 2.07747605  |
| Cu | -3.83349335 | 8.12356784 | 2.06252749  |
| Cu | -1.27501603 | 8.12024474 | 2.05986847  |
| Cu | 1.28291652  | 8.11621239 | 2.05986512  |
| Cu | 3.83410466  | 8.12073460 | 2.06422773  |
| Cu | 1.27339654  | 0.75167132 | 4.15582487  |
| Cu | 3.83426936  | 0.74198792 | 4.14297419  |
| Cu | 6.38956783  | 0.74025463 | 4.13280635  |
| Cu | 8.94621983  | 0.75091196 | 4.15653428  |
| Cu | -0.02386329 | 2.93989635 | 4.14307359  |
| Cu | 2.53965826  | 2.96721109 | 4.20951584  |
| Cu | 5.12992239  | 2.93796130 | 4.16727256  |
| Cu | 7.67732958  | 2.94841822 | 4.15682889  |
| Cu | -1.27307831 | 5.15893620 | 4.14793507  |
| Cu | 1.28200877  | 5.14595536 | 4.20155320  |
| Cu | 3.81219583  | 5.15374458 | 4.18215760  |

|    |             |            |            |
|----|-------------|------------|------------|
| Cu | 6.38579825  | 5.16488035 | 4.12942098 |
| Cu | -2.55738372 | 7.38090460 | 4.12943152 |
| Cu | 0.00110026  | 7.38056814 | 4.13583154 |
| Cu | 2.55408046  | 7.40183076 | 4.16393289 |
| Cu | 5.10670615  | 7.37821437 | 4.13567923 |
| Cu | 6.38850188  | 2.20978062 | 6.28412277 |
| Cu | 1.24434341  | 2.19898113 | 6.26656354 |
| Cu | 5.12326255  | 8.82094067 | 6.20739084 |
| Cu | 3.83736915  | 2.19913227 | 6.21664692 |
| Cu | 1.25871141  | 6.65543096 | 6.20542156 |
| Cu | 5.12324891  | 4.42256142 | 6.20211974 |
| Cu | -0.02155581 | 8.84437418 | 6.21136594 |
| Cu | 2.56152599  | 4.44215209 | 6.39510021 |
| Cu | -2.55983794 | 8.85387743 | 6.21364270 |
| Cu | -0.03886856 | 4.41284022 | 6.25240441 |
| Cu | 7.63707403  | 4.45905762 | 6.20944700 |
| Cu | 7.65868429  | 0.00786031 | 6.26849903 |
| Cu | -1.28384092 | 6.64160842 | 6.21147583 |
| Cu | 6.38906468  | 6.64018424 | 6.21327720 |
| Cu | 8.92884702  | 2.20891979 | 6.37007295 |
| Cu | 3.83282348  | 6.65438148 | 6.20817781 |

Str 12

Free energy from VASP is -313.93075600 eV

|            |             |             |             |           |           |
|------------|-------------|-------------|-------------|-----------|-----------|
| PBC        | 10.223900   | 10.223900   | 20.000000   | 90.000000 | 90.000000 |
| 120.000000 |             |             |             |           |           |
| H          | 5.19677997  | 4.69811258  | 10.04495515 |           |           |
| H          | 3.11288667  | 4.15510808  | 8.70243031  |           |           |
| H          | 4.28141750  | 5.94159869  | 10.91492019 |           |           |
| H          | 2.87697752  | 3.90750344  | 10.44761858 |           |           |
| H          | 5.69384871  | 6.96023243  | 9.07344276  |           |           |
| H          | 5.32516724  | 5.66366103  | 7.65875958  |           |           |
| H          | 5.11669953  | 2.87894361  | 7.27009562  |           |           |
| H          | 2.17597769  | 6.33891502  | 9.20382858  |           |           |
| C          | 4.36219578  | 5.40868405  | 9.94604473  |           |           |
| C          | 3.04320611  | 4.68248694  | 9.68441915  |           |           |
| C          | 4.70318691  | 6.48133460  | 8.93466133  |           |           |
| O          | 1.91164281  | 5.54614090  | 9.72313755  |           |           |
| O          | 3.74700417  | 7.20296224  | 8.43198097  |           |           |
| Cu         | -0.00195990 | 0.00108220  | 0.01493144  |           |           |
| Cu         | 2.55238692  | 0.00069426  | 0.01593916  |           |           |
| Cu         | 5.10991462  | -0.00341589 | 0.02383608  |           |           |
| Cu         | 7.66860906  | -0.00165018 | 0.01558623  |           |           |

|    |             |            |            |
|----|-------------|------------|------------|
| Cu | 8.94712618  | 2.21391733 | 0.00484828 |
| Cu | 1.27464014  | 2.21503770 | 0.00565031 |
| Cu | 3.83069525  | 2.21582736 | 0.02873736 |
| Cu | 6.38774613  | 2.21227606 | 0.01572993 |
| Cu | -2.55360286 | 4.43152359 | 0.00826360 |
| Cu | -0.00009361 | 4.43006148 | 0.00674656 |
| Cu | 2.54989434  | 4.43145839 | 0.01479716 |
| Cu | 5.10890403  | 4.43195465 | 0.03514031 |
| Cu | 6.38593714  | 6.64416951 | 0.02598254 |
| Cu | -1.27698175 | 6.64286365 | 0.01212638 |
| Cu | 1.27683296  | 6.64086625 | 0.01759173 |
| Cu | 3.83189780  | 6.64459693 | 0.03003075 |
| Cu | -0.00310578 | 1.47867424 | 2.09622075 |
| Cu | 2.54907128  | 1.47770770 | 2.09775012 |
| Cu | 5.10843994  | 1.48025135 | 2.10252829 |
| Cu | 7.66889263  | 1.47649001 | 2.09420982 |
| Cu | -1.28165642 | 3.68845229 | 2.09414799 |
| Cu | 1.27800293  | 3.68901023 | 2.09710648 |
| Cu | 3.82845691  | 3.70280818 | 2.11393307 |
| Cu | 6.39329624  | 3.69089954 | 2.09132797 |
| Cu | -2.56004178 | 5.90150175 | 2.10151071 |
| Cu | -0.00195656 | 5.90134293 | 2.09673846 |
| Cu | 2.56118674  | 5.90148438 | 2.11855795 |
| Cu | 5.10687563  | 5.90666249 | 2.12705019 |
| Cu | -3.84082859 | 8.11316166 | 2.11469613 |
| Cu | -1.28845556 | 8.11724790 | 2.10892729 |
| Cu | 1.28243783  | 8.11588034 | 2.10783706 |
| Cu | 3.83390826  | 8.11622015 | 2.11572106 |
| Cu | 1.27437378  | 0.73729485 | 4.17419139 |
| Cu | 3.82906968  | 0.75063014 | 4.18200312 |
| Cu | 6.37669612  | 0.74902013 | 4.17781914 |
| Cu | 8.94186619  | 0.73958422 | 4.17576321 |
| Cu | 0.00013575  | 2.95291394 | 4.16786324 |
| Cu | 2.56769160  | 2.95032057 | 4.18553634 |
| Cu | 5.10983402  | 2.97561381 | 4.17132105 |
| Cu | 7.65177570  | 2.94724030 | 4.18036810 |
| Cu | -1.28025273 | 5.16459008 | 4.16899853 |
| Cu | 1.27530399  | 5.16357623 | 4.17108925 |
| Cu | 3.84911741  | 5.17573023 | 4.26428347 |
| Cu | 6.37938500  | 5.14979922 | 4.19684091 |
| Cu | -2.57896707 | 7.36249504 | 4.19686861 |
| Cu | -0.00838331 | 7.38256873 | 4.16538943 |
| Cu | 2.56422666  | 7.37110316 | 4.20158543 |
| Cu | 5.10075910  | 7.37156354 | 4.23231875 |

|    |             |            |            |
|----|-------------|------------|------------|
| Cu | 6.37951974  | 2.21546532 | 6.29538537 |
| Cu | 5.12996272  | 4.42361180 | 6.42722758 |
| Cu | 1.27941530  | 2.20855799 | 6.24765366 |
| Cu | 3.83776103  | 2.21681382 | 6.29490327 |
| Cu | -1.28971382 | 6.63781955 | 6.25632407 |
| Cu | -0.00496020 | 4.42047921 | 6.25879446 |
| Cu | 7.63833006  | 0.03855815 | 6.23151657 |
| Cu | 6.38225051  | 6.59749982 | 6.31105516 |
| Cu | -2.51611643 | 4.41780552 | 6.23873934 |
| Cu | -0.01891881 | 8.83410432 | 6.24235109 |
| Cu | 3.76835799  | 6.69146285 | 6.36929396 |
| Cu | 8.94548789  | 2.21775564 | 6.24502329 |
| Cu | -2.56968938 | 8.84482121 | 6.25074452 |
| Cu | 1.23607068  | 6.63901771 | 6.23753068 |
| Cu | 2.51412150  | 4.42244172 | 6.24570169 |
| Cu | 0.00145113  | 0.02956024 | 6.25444323 |

Str 13

Free energy from VASP is -314.75637300 eV

|            |             |            |             |           |           |
|------------|-------------|------------|-------------|-----------|-----------|
| PBC        | 10.223900   | 10.223900  | 20.000000   | 90.000000 | 90.000000 |
| 120.000000 |             |            |             |           |           |
| H          | 2.86388000  | 2.96051755 | 8.47209078  |           |           |
| H          | 5.10301519  | 4.81156428 | 10.19522746 |           |           |
| H          | 2.63250765  | 4.87544325 | 10.28912645 |           |           |
| H          | 4.16425155  | 2.55522421 | 10.51737582 |           |           |
| H          | 3.20928498  | 6.06662171 | 9.09696124  |           |           |
| H          | 5.51673600  | 2.41457440 | 9.36361182  |           |           |
| H          | 5.07914440  | 4.63602584 | 8.43623462  |           |           |
| H          | -0.00347217 | 7.36070181 | 7.25968413  |           |           |
| C          | 4.52937018  | 4.36356772 | 9.36705037  |           |           |
| C          | 3.12769267  | 4.98235013 | 9.30364451  |           |           |
| C          | 4.51519668  | 2.84606119 | 9.51088484  |           |           |
| O          | 2.29282763  | 4.34432781 | 8.33391041  |           |           |
| O          | 3.61361513  | 2.23539923 | 8.54744469  |           |           |
| Cu         | 0.00339831  | 0.00533133 | 19.99894727 |           |           |
| Cu         | 2.55678912  | 0.00698127 | 0.01904112  |           |           |
| Cu         | 5.11375347  | 0.00519204 | 0.01861323  |           |           |
| Cu         | 7.67503813  | 0.00498982 | 19.98735101 |           |           |
| Cu         | -1.27199344 | 2.21307221 | 19.99994149 |           |           |
| Cu         | 1.28379549  | 2.21502310 | 0.02747745  |           |           |
| Cu         | 3.83597548  | 2.21876405 | 0.04090475  |           |           |
| Cu         | 6.39065369  | 2.21640302 | 0.00828025  |           |           |
| Cu         | -2.55471441 | 4.42695916 | 0.00943303  |           |           |

|    |             |            |            |
|----|-------------|------------|------------|
| Cu | 0.00639989  | 4.42330454 | 0.01533705 |
| Cu | 2.56334779  | 4.42457209 | 0.03906776 |
| Cu | 5.11234742  | 4.42640268 | 0.01931125 |
| Cu | -3.83181043 | 6.64183862 | 0.00589334 |
| Cu | -1.27510811 | 6.64429749 | 0.02283823 |
| Cu | 1.28232819  | 6.64102892 | 0.01266792 |
| Cu | 3.83841983  | 6.64013523 | 0.00106419 |
| Cu | 0.00620867  | 1.47795525 | 2.09216631 |
| Cu | 2.56849156  | 1.48632910 | 2.13478535 |
| Cu | 5.11635427  | 1.48089264 | 2.11773657 |
| Cu | 7.66968051  | 1.47520553 | 2.07975035 |
| Cu | -1.27057925 | 3.69180417 | 2.09172086 |
| Cu | 1.29450183  | 3.69062518 | 2.12744501 |
| Cu | 3.83898524  | 3.68881956 | 2.13435966 |
| Cu | 6.38788341  | 3.68411589 | 2.10439618 |
| Cu | -2.55194278 | 5.90313815 | 2.09273418 |
| Cu | 0.01506338  | 5.89618693 | 2.09473139 |
| Cu | 2.56445527  | 5.90488091 | 2.10426804 |
| Cu | 5.10966119  | 5.90222400 | 2.09642524 |
| Cu | -3.82578888 | 8.11860620 | 2.08968623 |
| Cu | -1.27514194 | 8.13325863 | 2.10321840 |
| Cu | 1.28960940  | 8.12253498 | 2.07815974 |
| Cu | 3.83557045  | 8.11696215 | 2.07710890 |
| Cu | 1.29038806  | 0.73797172 | 4.16769433 |
| Cu | 3.85263346  | 0.75337115 | 4.24962239 |
| Cu | 6.39209965  | 0.72794653 | 4.17724181 |
| Cu | 8.95272457  | 0.73797213 | 4.14999065 |
| Cu | 0.01375652  | 2.95612283 | 4.16989046 |
| Cu | 2.58666533  | 2.96567565 | 4.27437805 |
| Cu | 5.10530752  | 2.94160009 | 4.23017900 |
| Cu | 7.67696141  | 2.94982353 | 4.15206993 |
| Cu | -1.25902466 | 5.17807838 | 4.17465424 |
| Cu | 1.30195761  | 5.16781727 | 4.22819272 |
| Cu | 3.82593924  | 5.15878300 | 4.21236261 |
| Cu | 6.39319862  | 5.16357412 | 4.16226151 |
| Cu | -2.53167581 | 7.38119450 | 4.17354418 |
| Cu | 0.01228257  | 7.38028912 | 4.13321063 |
| Cu | 2.55100154  | 7.37840410 | 4.17307797 |
| Cu | 5.12020602  | 7.38088202 | 4.14735449 |
| Cu | -3.81756295 | 6.64385228 | 6.22581223 |
| Cu | 7.70513253  | 0.01251680 | 6.23721780 |
| Cu | 5.15221956  | 4.44384860 | 6.23886394 |
| Cu | 3.89619769  | 2.17605151 | 6.44099496 |
| Cu | 2.56596212  | 4.47652752 | 6.39964779 |

|    |             |            |            |
|----|-------------|------------|------------|
| Cu | -2.57658151 | 8.84282796 | 6.24805732 |
| Cu | 1.27690607  | 6.66934068 | 6.29283757 |
| Cu | -1.26467647 | 6.64465240 | 6.28745983 |
| Cu | -0.01994552 | 4.40179365 | 6.24777773 |
| Cu | 1.25529962  | 2.18265060 | 6.22612786 |
| Cu | 6.43604845  | 2.20109193 | 6.23235292 |
| Cu | -2.54354836 | 4.42832857 | 6.22681406 |
| Cu | 3.85702183  | 6.67700164 | 6.21658589 |
| Cu | -1.27125538 | 2.20687986 | 6.23874371 |
| Cu | -5.10467331 | 8.84918882 | 6.24143010 |
| Cu | 0.03475721  | 8.82318040 | 6.30250255 |

Str 14

Free energy from VASP is -313.67465900 eV

|            |             |            |             |           |           |
|------------|-------------|------------|-------------|-----------|-----------|
| PBC        | 10.223900   | 10.223900  | 20.000000   | 90.000000 | 90.000000 |
| 120.000000 |             |            |             |           |           |
| H          | 1.30895640  | 2.55554427 | 11.23083277 |           |           |
| H          | 0.09948611  | 1.85765989 | 9.31351001  |           |           |
| H          | 2.51948182  | 4.57278264 | 11.58183302 |           |           |
| H          | -0.43984411 | 3.52671366 | 9.60987535  |           |           |
| H          | 0.91177777  | 5.04661534 | 10.99016069 |           |           |
| H          | 1.24740925  | 4.53387608 | 7.42507555  |           |           |
| H          | 2.00136330  | 5.40948723 | 8.91680865  |           |           |
| H          | 2.48848864  | 2.63182435 | 9.91084647  |           |           |
| C          | 1.57507058  | 3.10252845 | 10.30907923 |           |           |
| C          | 0.43023894  | 2.90989987 | 9.32040483  |           |           |
| C          | 1.86178889  | 4.55422257 | 10.70119341 |           |           |
| O          | 0.80220693  | 3.23623417 | 7.96027451  |           |           |
| O          | 2.55575533  | 5.33014124 | 9.71831189  |           |           |
| Cu         | 0.00190070  | 0.00052632 | 0.00184647  |           |           |
| Cu         | 2.55496734  | 0.00088468 | 0.00409961  |           |           |
| Cu         | 5.11339082  | 0.00172950 | 0.00447888  |           |           |
| Cu         | 7.66756248  | 0.00163715 | 0.00370963  |           |           |
| Cu         | 8.94622381  | 2.21494120 | 0.00143405  |           |           |
| Cu         | 1.27844815  | 2.21154692 | 0.00205842  |           |           |
| Cu         | 3.83454824  | 2.21481136 | 0.00084539  |           |           |
| Cu         | 6.39022129  | 2.21485417 | 0.00036869  |           |           |
| Cu         | -2.55667016 | 4.42770090 | -0.00241368 |           |           |
| Cu         | -0.00061065 | 4.42807388 | 0.00219714  |           |           |
| Cu         | 2.55767309  | 4.42861006 | 0.00244426  |           |           |
| Cu         | 5.11296146  | 4.42718747 | -0.00060998 |           |           |
| Cu         | 6.39049472  | 6.64402645 | 0.00403165  |           |           |
| Cu         | -1.27960637 | 6.64311884 | 0.00112096  |           |           |



|    |             |             |            |
|----|-------------|-------------|------------|
| Cu | 1.27867381  | 6.64319955  | 0.00341294 |
| Cu | 3.83552554  | 6.64270269  | 0.00215451 |
| Cu | 0.00128451  | 1.47682910  | 2.08954755 |
| Cu | 2.55523392  | 1.47669885  | 2.09166311 |
| Cu | 5.11041037  | 1.47577830  | 2.08754868 |
| Cu | 7.66890133  | 1.47521855  | 2.08766659 |
| Cu | -1.27832823 | 3.68730646  | 2.08320398 |
| Cu | 1.27762108  | 3.68713831  | 2.08163873 |
| Cu | 3.83178452  | 3.68591502  | 2.08573974 |
| Cu | 6.38939742  | 3.69028872  | 2.08784411 |
| Cu | -2.55505650 | 5.90178321  | 2.08134475 |
| Cu | -0.00252559 | 5.90605798  | 2.08272253 |
| Cu | 2.55410772  | 5.90418366  | 2.08618527 |
| Cu | 5.11051244  | 5.90315417  | 2.07632770 |
| Cu | -3.83526291 | 8.12574628  | 2.09660065 |
| Cu | -1.27683282 | 8.11687876  | 2.08832632 |
| Cu | 1.27742958  | 8.11781720  | 2.08701921 |
| Cu | 3.83139284  | 8.11678710  | 2.08773799 |
| Cu | 1.27571542  | 0.75458233  | 4.19543070 |
| Cu | 3.83200332  | 0.73465658  | 4.16418111 |
| Cu | 6.38697824  | 0.73440597  | 4.16706096 |
| Cu | 8.94453596  | 0.73346355  | 4.16244285 |
| Cu | 0.00470368  | 2.95086945  | 4.17958389 |
| Cu | 2.53980567  | 2.95280806  | 4.18736017 |
| Cu | 5.10688232  | 2.94999699  | 4.16488244 |
| Cu | 7.66530717  | 2.95037212  | 4.16427084 |
| Cu | -1.28526771 | 5.16319485  | 4.16201542 |
| Cu | 1.26807363  | 5.16073888  | 4.15215379 |
| Cu | 3.83426042  | 5.16495464  | 4.15647491 |
| Cu | 6.38262036  | 5.16927888  | 4.15368938 |
| Cu | -2.56003728 | 7.37761870  | 4.15755037 |
| Cu | 0.00298157  | 7.37258209  | 4.17584820 |
| Cu | 2.54674764  | 7.37003374  | 4.17532782 |
| Cu | 5.10661588  | 7.37382265  | 4.15979863 |
| Cu | 1.28390824  | 2.13320569  | 6.32600036 |
| Cu | 5.11363907  | -0.01603624 | 6.24893183 |
| Cu | -1.30530297 | 6.65181533  | 6.24552408 |
| Cu | 3.84008510  | 6.64506680  | 6.25579493 |
| Cu | 5.09278379  | 8.82439054  | 6.23796089 |
| Cu | 1.27079461  | 6.60716166  | 6.30261169 |
| Cu | -2.55017185 | 8.83116319  | 6.24455542 |
| Cu | 6.38017365  | 6.63297711  | 6.24575670 |
| Cu | 7.63391472  | 4.42452148  | 6.23026667 |
| Cu | 3.84562482  | 2.20211813  | 6.22849039 |

|    |             |            |            |
|----|-------------|------------|------------|
| Cu | 5.10707913  | 4.42217192 | 6.23935249 |
| Cu | 2.54087386  | 8.83614484 | 6.25126441 |
| Cu | 6.37918357  | 2.20487175 | 6.25550411 |
| Cu | -0.06725963 | 4.47022514 | 6.22894367 |
| Cu | 8.90645614  | 2.19097409 | 6.21756430 |
| Cu | 2.57393980  | 4.47359266 | 6.22834649 |

Str 15

Free energy from VASP is -315.05615700 eV

PBC 10.223900 10.223900 20.000000 90.000000 90.000000

120.000000

|    |             |            |             |
|----|-------------|------------|-------------|
| H  | 6.30055975  | 2.15328358 | 8.53010910  |
| H  | 6.22150780  | 1.75802999 | 10.25165557 |
| H  | 4.21078227  | 2.99328516 | 9.56669657  |
| H  | 8.49602698  | 2.51841057 | 9.44676606  |
| H  | 5.14001842  | 3.99820573 | 10.70845018 |
| H  | 7.86844505  | 3.47433834 | 10.82643404 |
| H  | -1.49422828 | 4.71637459 | 8.87876477  |
| H  | 6.02309020  | 5.02815329 | 8.76628143  |
| C  | 6.33907572  | 2.59750767 | 9.54569727  |
| C  | 5.15245581  | 3.54263530 | 9.70233780  |
| C  | 7.70902892  | 3.22287968 | 9.76321432  |
| O  | 5.13502057  | 4.60681705 | 8.71694197  |
| O  | -2.42573394 | 4.43846964 | 8.97476084  |
| Cu | 5.11194552  | 8.85127755 | 19.99105937 |
| Cu | -2.55758212 | 8.85209664 | 19.99254484 |
| Cu | -0.00085888 | 8.85372147 | 19.99470046 |
| Cu | 2.55661110  | 8.85209552 | 19.99144659 |
| Cu | 8.94530363  | 2.21279157 | 19.99005346 |
| Cu | 1.27781247  | 2.21201952 | 19.98741790 |
| Cu | 3.83429515  | 2.21499740 | 19.99876813 |
| Cu | 6.38858067  | 2.21597676 | 0.00184053  |
| Cu | 7.66386251  | 4.42548434 | 0.00803146  |
| Cu | -0.00139125 | 4.42483028 | 19.99241265 |
| Cu | 2.55869473  | 4.42515989 | 19.99910826 |
| Cu | 5.11253456  | 4.42582990 | 0.01458113  |
| Cu | 6.38781264  | 6.63572448 | 0.01022168  |
| Cu | -1.28170997 | 6.63655428 | 0.00081513  |
| Cu | 1.27889193  | 6.63635485 | 19.99708951 |
| Cu | 3.83657921  | 6.63574944 | 0.00477498  |
| Cu | 0.00014420  | 1.47163397 | 2.06782031  |
| Cu | 2.55329593  | 1.47256524 | 2.07186555  |
| Cu | 5.10961325  | 1.47888346 | 2.08350427  |

|    |             |            |            |
|----|-------------|------------|------------|
| Cu | 7.66819710  | 1.47410140 | 2.07260959 |
| Cu | -1.27989620 | 3.68396336 | 2.07808142 |
| Cu | 1.27737486  | 3.68474546 | 2.06958162 |
| Cu | 3.83374127  | 3.68650062 | 2.09687206 |
| Cu | 6.38638295  | 3.68676047 | 2.10368817 |
| Cu | -2.56544002 | 5.89260661 | 2.10119206 |
| Cu | -0.00420697 | 5.89469583 | 2.07613687 |
| Cu | 2.56247462  | 5.89298188 | 2.08809095 |
| Cu | 5.11271131  | 5.89333303 | 2.10965964 |
| Cu | -3.83617538 | 8.11256432 | 2.07899390 |
| Cu | -1.28056098 | 8.11105563 | 2.07088154 |
| Cu | 1.27798501  | 8.10995077 | 2.06866500 |
| Cu | 3.83425554  | 8.11034687 | 2.07408890 |
| Cu | 1.27525927  | 0.73143228 | 4.15438471 |
| Cu | 3.82970386  | 0.72901025 | 4.14656830 |
| Cu | 6.38788404  | 0.72830261 | 4.14090362 |
| Cu | 8.94585465  | 0.72956314 | 4.14474843 |
| Cu | 0.00078878  | 2.94461383 | 4.14736869 |
| Cu | 2.54745979  | 2.94357158 | 4.15552481 |
| Cu | 5.10432830  | 2.95738603 | 4.19328531 |
| Cu | 7.66863244  | 2.94737584 | 4.16476192 |
| Cu | -1.28570072 | 5.15370149 | 4.16596957 |
| Cu | 1.27584013  | 5.15707041 | 4.15008568 |
| Cu | 3.84201513  | 5.14818422 | 4.20595260 |
| Cu | 6.37609986  | 5.14262286 | 4.22328646 |
| Cu | -2.55781315 | 7.37149129 | 4.15520768 |
| Cu | -0.00227803 | 7.36839293 | 4.14453470 |
| Cu | 2.55427115  | 7.36745048 | 4.15103797 |
| Cu | 5.10863718  | 7.37343193 | 4.16153678 |
| Cu | 8.95395819  | 2.19470820 | 6.21827634 |
| Cu | 0.00041893  | 4.41629606 | 6.23025331 |
| Cu | 3.80970312  | 2.18576207 | 6.22300042 |
| Cu | 7.67620794  | 4.41043883 | 6.28331826 |
| Cu | 2.52746898  | 4.41149840 | 6.23789427 |
| Cu | 3.82246767  | 6.64614548 | 6.23849808 |
| Cu | 5.08367537  | 4.40436284 | 6.40286175 |
| Cu | -0.00514440 | 8.83893261 | 6.22068575 |
| Cu | -3.83440539 | 6.65256525 | 6.22650749 |
| Cu | -1.27640840 | 6.63526928 | 6.23002490 |
| Cu | 5.10763502  | 8.84841359 | 6.24008723 |
| Cu | 1.27119774  | 6.63085021 | 6.23252457 |
| Cu | -2.56000456 | 8.84321083 | 6.23867413 |
| Cu | 2.55281559  | 8.84302339 | 6.22280827 |
| Cu | 6.38783250  | 2.18380479 | 6.20678228 |

|    |            |            |            |
|----|------------|------------|------------|
| Cu | 1.26828414 | 2.20005943 | 6.24168430 |
|----|------------|------------|------------|

### 3. 1,2-PDO-dehydration path

Str 1

Free energy from VASP is -328.39379400 eV

|     |           |           |           |           |           |
|-----|-----------|-----------|-----------|-----------|-----------|
| PBC | 10.223900 | 10.223900 | 20.000000 | 90.000000 | 90.000000 |
|-----|-----------|-----------|-----------|-----------|-----------|

120.000000

|    |             |            |             |
|----|-------------|------------|-------------|
| H  | 2.56691945  | 1.43923141 | 7.25711903  |
| H  | -0.04377945 | 2.94207071 | 7.26393275  |
| H  | 1.94551802  | 5.59350670 | 11.35439436 |
| H  | 1.76263090  | 6.24853554 | 8.99010230  |
| H  | 2.17365364  | 3.79615525 | 9.64350942  |
| H  | 2.56244699  | 7.54714549 | 9.93089289  |
| H  | 3.10591426  | 3.43031148 | 11.13626072 |
| H  | 4.74420331  | 5.94699531 | 11.06855044 |
| H  | 4.19671842  | 5.57640868 | 8.76773784  |
| H  | 4.16467228  | 3.36776412 | 8.77649582  |
| C  | 2.85629577  | 5.54905729 | 10.73368286 |
| C  | 2.67251270  | 6.51886758 | 9.55972649  |
| C  | 3.03096740  | 4.10086297 | 10.26669922 |
| O  | 3.92418748  | 5.94984188 | 11.59620540 |
| O  | 3.83227244  | 6.50257320 | 8.68242509  |
| O  | 4.26507973  | 4.02136705 | 9.50131530  |
| Cu | 5.10835498  | 8.84704951 | 0.00127886  |
| Cu | -2.55543284 | 8.85212949 | 0.00592344  |
| Cu | 0.00152531  | 8.85223995 | 0.00382139  |
| Cu | 2.55532374  | 8.85039728 | 0.00186300  |
| Cu | 8.94196113  | 2.21496390 | 0.00537177  |
| Cu | 1.27766833  | 2.21275799 | 0.01181878  |
| Cu | 3.83527190  | 2.21290275 | 0.00614283  |
| Cu | 6.39109844  | 2.21514433 | 0.00009607  |
| Cu | 7.66517761  | 4.42851017 | 0.00553876  |
| Cu | -0.00407226 | 4.42907591 | 0.00459696  |
| Cu | 2.55961507  | 4.43283322 | 0.00119318  |
| Cu | 5.11424490  | 4.43011061 | 0.00250585  |
| Cu | 6.38824836  | 6.63671419 | 0.00238845  |
| Cu | -1.27942586 | 6.63810758 | 19.99957806 |
| Cu | 1.28003365  | 6.64250111 | 0.00191010  |
| Cu | 3.83422949  | 6.64042098 | 0.00235666  |
| Cu | -0.00423426 | 1.47161580 | 2.07977278  |
| Cu | 2.55589452  | 1.47251059 | 2.08560339  |
| Cu | 5.11418136  | 1.47617222 | 2.08145297  |
| Cu | 7.66551325  | 1.47261319 | 2.08871219  |
| Cu | -1.27891381 | 3.68798736 | 2.08911201  |
| Cu | 1.27788053  | 3.69337579 | 2.07727849  |
| Cu | 3.83334997  | 3.69403090 | 2.09033757  |

|    |             |            |            |
|----|-------------|------------|------------|
| Cu | 6.38841629  | 3.68404943 | 2.09613188 |
| Cu | -2.55303085 | 5.90494884 | 2.09663548 |
| Cu | -0.00047430 | 5.90443256 | 2.08853882 |
| Cu | 2.55339313  | 5.90226380 | 2.09608390 |
| Cu | 5.10910155  | 5.90458536 | 2.09220622 |
| Cu | -3.83943831 | 8.11244607 | 2.09396081 |
| Cu | -1.27932440 | 8.11161499 | 2.08182064 |
| Cu | 1.28246514  | 8.11275440 | 2.09833809 |
| Cu | 3.83285494  | 8.11634263 | 2.09794856 |
| Cu | 1.27193739  | 0.74587709 | 4.17299303 |
| Cu | 3.83142993  | 0.73273696 | 4.15585214 |
| Cu | 6.38460431  | 0.73703332 | 4.16401753 |
| Cu | 8.94420544  | 0.74866030 | 4.17545024 |
| Cu | 0.01492573  | 2.93748268 | 4.15676738 |
| Cu | 2.54133091  | 2.94105598 | 4.16509683 |
| Cu | 5.08758403  | 2.93410405 | 4.17473073 |
| Cu | 7.67532782  | 2.94732979 | 4.17646723 |
| Cu | -1.27503493 | 5.14946691 | 4.17670800 |
| Cu | 1.26190231  | 5.15132609 | 4.17196157 |
| Cu | 3.83398467  | 5.17622035 | 4.18245299 |
| Cu | 6.39091061  | 5.15895545 | 4.15547868 |
| Cu | -2.55990830 | 7.39575798 | 4.17958269 |
| Cu | -0.00770047 | 7.37607806 | 4.16226879 |
| Cu | 2.56593376  | 7.36622985 | 4.19529103 |
| Cu | 5.09781619  | 7.36443810 | 4.19058329 |
| Cu | -1.29035035 | 6.62612545 | 6.24104059 |
| Cu | 3.80857431  | 6.63558855 | 6.39840559 |
| Cu | 2.55384290  | 4.42880453 | 6.20207207 |
| Cu | 1.26352078  | 2.20016581 | 6.38378922 |
| Cu | 1.24265767  | 6.62351804 | 6.22606784 |
| Cu | 7.63890418  | 4.42503411 | 6.24229195 |
| Cu | 8.93798225  | 2.20835420 | 6.29049756 |
| Cu | -0.01321614 | 4.40110437 | 6.29540073 |
| Cu | 3.81436428  | 2.19427375 | 6.29373834 |
| Cu | 5.08698574  | 8.82344876 | 6.21786136 |
| Cu | 7.64714502  | 0.00655731 | 6.23065635 |
| Cu | -2.56704074 | 8.84244127 | 6.28868698 |
| Cu | 6.38916387  | 6.62419146 | 6.23020158 |
| Cu | 0.00252283  | 8.83265511 | 6.23671930 |
| Cu | 5.10719284  | 4.39874502 | 6.21703056 |
| Cu | 6.37317998  | 2.20179951 | 6.24412414 |

Free energy from VASP is -327.55689300 eV

| PBC        | 10.223900   | 10.223900   | 20.000000   | 90.000000 | 90.000000 |
|------------|-------------|-------------|-------------|-----------|-----------|
| 120.000000 |             |             |             |           |           |
| H          | 0.41803939  | 3.78330425  | 9.08754491  |           |           |
| H          | 2.58304673  | 2.83799530  | 11.57251313 |           |           |
| H          | -0.00935142 | 3.99196046  | 11.51408969 |           |           |
| H          | 2.57227681  | 5.05842209  | 10.42006097 |           |           |
| H          | 0.76966359  | 1.19468379  | 11.15693051 |           |           |
| H          | 2.92490548  | 3.70592893  | 9.28587146  |           |           |
| H          | 1.81427403  | 1.40729991  | 9.70755324  |           |           |
| H          | 1.30934761  | 4.77421857  | 7.81179170  |           |           |
| H          | -0.20052064 | 1.72910747  | 8.82017480  |           |           |
| H          | -0.02218211 | 7.40968325  | 7.25539596  |           |           |
| C          | 1.69330947  | 3.15089279  | 11.00030645 |           |           |
| C          | 2.16345321  | 4.15825345  | 9.94539963  |           |           |
| C          | 1.08179799  | 1.89767883  | 10.36929725 |           |           |
| O          | 0.81995222  | 3.74417010  | 11.96353382 |           |           |
| O          | 1.02959254  | 4.59771141  | 9.12340272  |           |           |
| O          | -0.08657991 | 2.31094164  | 9.60586383  |           |           |
| Cu         | 0.00103464  | 0.00020449  | 0.00498014  |           |           |
| Cu         | 2.55388503  | -0.00035608 | 0.00389075  |           |           |
| Cu         | 5.11369406  | 0.00007407  | 0.00906814  |           |           |
| Cu         | 7.67019607  | 0.00281001  | 0.00331187  |           |           |
| Cu         | 8.94612973  | 2.21248154  | 0.00501377  |           |           |
| Cu         | 1.27749488  | 2.21182995  | 0.00640117  |           |           |
| Cu         | 3.83638904  | 2.21495120  | 0.00410722  |           |           |
| Cu         | 6.39104634  | 2.21481048  | 0.00217394  |           |           |
| Cu         | -2.55768036 | 4.42638791  | 0.00297858  |           |           |
| Cu         | 0.00044275  | 4.42337431  | 0.00737437  |           |           |
| Cu         | 2.55853829  | 4.42710207  | 0.00848962  |           |           |
| Cu         | 5.11374617  | 4.42757513  | 0.00395788  |           |           |
| Cu         | 6.38950041  | 6.64037184  | 0.00381682  |           |           |
| Cu         | -1.28002554 | 6.64241800  | 0.00989594  |           |           |
| Cu         | 1.27895243  | 6.64206727  | 0.01295945  |           |           |
| Cu         | 3.83824963  | 6.64033868  | 0.00475765  |           |           |
| Cu         | -0.00065265 | 1.47569516  | 2.08670002  |           |           |
| Cu         | 2.55963849  | 1.47520768  | 2.09089661  |           |           |
| Cu         | 5.11155533  | 1.47772152  | 2.09209824  |           |           |
| Cu         | 7.66602117  | 1.47504143  | 2.09310697  |           |           |
| Cu         | -1.27980954 | 3.69286595  | 2.08965462  |           |           |
| Cu         | 1.27997465  | 3.69263233  | 2.09114912  |           |           |
| Cu         | 3.83514189  | 3.68840663  | 2.09095273  |           |           |
| Cu         | 6.39127465  | 3.69025617  | 2.09351264  |           |           |
| Cu         | -2.55563402 | 5.90121518  | 2.09412554  |           |           |

|    |             |            |            |
|----|-------------|------------|------------|
| Cu | -0.00180717 | 5.89946513 | 2.08696000 |
| Cu | 2.55955831  | 5.90315864 | 2.09322563 |
| Cu | 5.11147808  | 5.90348390 | 2.09387526 |
| Cu | -3.83172579 | 8.11298182 | 2.09395953 |
| Cu | -1.27837213 | 8.11731485 | 2.09046041 |
| Cu | 1.28182602  | 8.11884072 | 2.08954108 |
| Cu | 3.82974791  | 8.11294205 | 2.09309416 |
| Cu | 1.27646734  | 0.73955373 | 4.16293213 |
| Cu | 3.83987643  | 0.72952745 | 4.18119147 |
| Cu | 6.38165076  | 0.73166993 | 4.18407901 |
| Cu | 8.94518533  | 0.73599219 | 4.16362037 |
| Cu | -0.00039965 | 2.95466907 | 4.16091509 |
| Cu | 2.55246963  | 2.96032142 | 4.17178047 |
| Cu | 5.10920389  | 2.95347013 | 4.17362688 |
| Cu | 7.66781375  | 2.95290389 | 4.16729680 |
| Cu | -1.26881736 | 5.17318913 | 4.19146074 |
| Cu | 1.27612863  | 5.17809886 | 4.17546949 |
| Cu | 3.82418423  | 5.16028670 | 4.18287516 |
| Cu | 6.38683924  | 5.16545622 | 4.17212526 |
| Cu | -2.54619568 | 7.37561517 | 4.18164547 |
| Cu | 0.00541994  | 7.37274743 | 4.15565931 |
| Cu | 2.53911925  | 7.37243475 | 4.19580596 |
| Cu | 5.10704640  | 7.37872682 | 4.17022380 |
| Cu | 7.68290796  | 0.00985619 | 6.24906452 |
| Cu | 5.09911467  | 4.42746926 | 6.25297936 |
| Cu | 10.21785667 | 0.00345240 | 6.26767126 |
| Cu | 3.82951700  | 2.21916083 | 6.24226143 |
| Cu | 8.94096379  | 2.21385089 | 6.24470335 |
| Cu | 1.27252236  | 2.20055032 | 6.24684583 |
| Cu | 2.51996402  | 4.43997012 | 6.31613412 |
| Cu | -1.28225646 | 6.65269021 | 6.29963189 |
| Cu | 1.26719283  | 6.62201043 | 6.37210452 |
| Cu | 2.53110439  | 0.01332520 | 6.24701981 |
| Cu | 0.00042469  | 8.84812409 | 6.29750586 |
| Cu | 6.38344018  | 2.21640864 | 6.24961137 |
| Cu | 6.38463227  | 6.63868751 | 6.24895517 |
| Cu | 3.83072900  | 6.64127644 | 6.25428041 |
| Cu | -2.55466295 | 4.43040392 | 6.24533020 |
| Cu | 0.02162526  | 4.40704171 | 6.26262435 |

Str 3

Free energy from VASP is -327.56297700 eV

PBC 10.223900 10.223900 20.000000 90.000000 90.000000



120.000000

|    |             |            |             |
|----|-------------|------------|-------------|
| H  | 4.03164058  | 7.40356701 | 8.30825541  |
| H  | 5.11781924  | 1.47279123 | 7.24750026  |
| H  | 3.88825496  | 5.15628085 | 11.81522686 |
| H  | 2.62848272  | 4.21761305 | 9.90646425  |
| H  | 4.79982512  | 5.59411861 | 9.52635366  |
| H  | 1.48101069  | 4.74582987 | 11.18967905 |
| H  | 5.15378743  | 6.98079370 | 10.63162587 |
| H  | 2.63439274  | 6.83399642 | 9.15823536  |
| H  | 2.28447344  | 7.48575402 | 11.51299896 |
| H  | 1.25882659  | 5.55657620 | 8.70015795  |
| C  | 3.35080929  | 5.85653851 | 11.15500804 |
| C  | 2.22879840  | 5.08223894 | 10.45683418 |
| C  | 4.36615340  | 6.39577016 | 10.14484068 |
| O  | 2.85617972  | 6.87902056 | 12.01919352 |
| O  | 1.58852373  | 6.01472918 | 9.52097943  |
| O  | 3.62374919  | 7.32401269 | 9.25461929  |
| Cu | -5.10958122 | 8.85408695 | 0.00602150  |
| Cu | -2.55698881 | 8.85355534 | 0.00577642  |
| Cu | 5.10997423  | 0.00200725 | 0.00928024  |
| Cu | 7.66958929  | 0.00089629 | 0.00453084  |
| Cu | -1.27447937 | 2.21828257 | 0.00667681  |
| Cu | 1.27516370  | 2.21565721 | 0.00500999  |
| Cu | 3.83481789  | 2.21097297 | 0.01030999  |
| Cu | 6.38943168  | 2.21352618 | 0.01217257  |
| Cu | -2.55028320 | 4.42763061 | 0.00716398  |
| Cu | -0.00143228 | 4.42608428 | 0.01868685  |
| Cu | 2.55113608  | 4.42543481 | 0.00327553  |
| Cu | 5.11358745  | 4.42721790 | 0.00597714  |
| Cu | -3.83250921 | 6.64168497 | 0.00755031  |
| Cu | -1.27768659 | 6.63581663 | 0.00542577  |
| Cu | 1.27446458  | 6.63569229 | 0.00323715  |
| Cu | 3.83689233  | 6.64171639 | 0.00566668  |
| Cu | 0.00226066  | 1.47592422 | 2.09283913  |
| Cu | 2.55278205  | 1.47724492 | 2.09087763  |
| Cu | 5.11252571  | 1.47462639 | 2.09404490  |
| Cu | 7.67273933  | 1.47848715 | 2.08883751  |
| Cu | -1.28127012 | 3.68582560 | 2.10702553  |
| Cu | 1.28357064  | 3.68392212 | 2.10195800  |
| Cu | 3.83133297  | 3.68761189 | 2.08299529  |
| Cu | 6.39550934  | 3.69120445 | 2.09132232  |
| Cu | -2.55483190 | 5.90260789 | 2.09578060  |
| Cu | 0.00017274  | 5.90748018 | 2.10180168  |
| Cu | 2.55702479  | 5.90063380 | 2.07886869  |

|    |             |            |            |
|----|-------------|------------|------------|
| Cu | 5.11467994  | 5.89899668 | 2.08749076 |
| Cu | -3.82772004 | 8.11898485 | 2.09283929 |
| Cu | -1.27837965 | 8.11136178 | 2.08918385 |
| Cu | 1.27631117  | 8.11374904 | 2.07862363 |
| Cu | 3.83507831  | 8.11910303 | 2.08440587 |
| Cu | 1.27603685  | 0.73999423 | 4.17808980 |
| Cu | 3.83493834  | 0.73680470 | 4.16396895 |
| Cu | 6.39565482  | 0.73425145 | 4.16197845 |
| Cu | 8.95341659  | 0.73827348 | 4.16842636 |
| Cu | 0.00479895  | 2.95542288 | 4.17414153 |
| Cu | 2.58036982  | 2.93948585 | 4.19907029 |
| Cu | 5.11400192  | 2.95234885 | 4.16321087 |
| Cu | 7.65072734  | 2.93808959 | 4.19988861 |
| Cu | -1.26905917 | 5.16143865 | 4.17423017 |
| Cu | 1.28152078  | 5.15972719 | 4.16031830 |
| Cu | 3.83170315  | 5.16107942 | 4.15939610 |
| Cu | 6.39448494  | 5.16526964 | 4.17409412 |
| Cu | -2.55174167 | 7.37246874 | 4.17735342 |
| Cu | 0.00274803  | 7.40192947 | 4.19021453 |
| Cu | 2.55706067  | 7.37343055 | 4.14801468 |
| Cu | 5.11866883  | 7.37857921 | 4.15948639 |
| Cu | 3.84096167  | 2.21243058 | 6.31027217 |
| Cu | -1.26984703 | 6.63629848 | 6.25690652 |
| Cu | 1.28166736  | 2.21271497 | 6.25904646 |
| Cu | 2.55610982  | 4.42974891 | 6.26433048 |
| Cu | 6.38709660  | 6.63856385 | 6.27376422 |
| Cu | 5.11190937  | 4.44705687 | 6.24242742 |
| Cu | 1.28466894  | 6.63212713 | 6.23165417 |
| Cu | 5.11872447  | 0.00042256 | 6.30388017 |
| Cu | 6.39127664  | 2.20917590 | 6.30388687 |
| Cu | 0.01322833  | 4.42992599 | 6.27833292 |
| Cu | 5.10999718  | 8.83888199 | 6.27927305 |
| Cu | 3.84445504  | 6.63893499 | 6.22931403 |
| Cu | -2.57001162 | 8.84155116 | 6.23939607 |
| Cu | -2.54902882 | 4.42607640 | 6.25320150 |
| Cu | 2.58064169  | 8.83445432 | 6.23130703 |
| Cu | -1.26968803 | 2.21178084 | 6.24969774 |

Str 4

Free energy from VASP is -326.87855200 eV

|            |            |            |            |           |           |
|------------|------------|------------|------------|-----------|-----------|
| PBC        | 10.223900  | 10.223900  | 20.000000  | 90.000000 | 90.000000 |
| 120.000000 |            |            |            |           |           |
| H          | 5.11348022 | 7.37666432 | 7.24283537 |           |           |

|    |             |            |             |
|----|-------------|------------|-------------|
| H  | -0.67588916 | 7.94941975 | 8.66219704  |
| H  | 6.68263393  | 0.21712320 | 11.88925362 |
| H  | 7.06193449  | 1.64366742 | 9.56583531  |
| H  | 0.21003374  | 7.38660727 | 10.87713135 |
| H  | 6.48272701  | 2.72583429 | 10.98363608 |
| H  | 1.40215081  | 8.00422432 | 9.68028676  |
| H  | 4.25132086  | 1.56663883 | 11.46915232 |
| H  | 4.53724651  | 2.98085437 | 8.77680860  |
| H  | 4.24415133  | 1.48646306 | 9.17011991  |
| C  | 5.90755679  | 0.59402436 | 11.17847758 |
| C  | 6.48320335  | 1.75886769 | 10.48379930 |
| C  | 0.49316004  | 8.25239455 | 10.25781197 |
| O  | 4.79429434  | 0.94459145 | 11.99853165 |
| O  | 4.20949204  | 2.42080167 | 9.51052710  |
| O  | -0.59109780 | 8.60674956 | 9.38529820  |
| Cu | -0.00065261 | 0.00131123 | 0.00743859  |
| Cu | 2.55918766  | 0.00237251 | -0.00287104 |
| Cu | 5.11192946  | 0.00105428 | -0.00047904 |
| Cu | 7.66419713  | 0.00265585 | -0.00089622 |
| Cu | 8.94639115  | 2.21583504 | 0.00069816  |
| Cu | 1.27654994  | 2.21605181 | -0.00007903 |
| Cu | 3.83465343  | 2.21323174 | 0.00019346  |
| Cu | 6.38911649  | 2.21303316 | 0.00056583  |
| Cu | -2.55340435 | 4.42647529 | 0.00010595  |
| Cu | -0.00059910 | 4.42722202 | 0.00019870  |
| Cu | 2.55297822  | 4.42660481 | 0.00060971  |
| Cu | 5.11174839  | 4.42264104 | -0.00118539 |
| Cu | 6.39021140  | 6.64048777 | 0.00676471  |
| Cu | -1.27633082 | 6.63869935 | -0.00007198 |
| Cu | 1.27589745  | 6.63895807 | 0.00128823  |
| Cu | 3.83294086  | 6.64063762 | 0.00768069  |
| Cu | 0.00005460  | 1.47775877 | 2.08822173  |
| Cu | 2.55157983  | 1.47486969 | 2.08322221  |
| Cu | 5.11212655  | 1.47528391 | 2.07733197  |
| Cu | 7.67175001  | 1.47502142 | 2.08598747  |
| Cu | -1.27868518 | 3.68787566 | 2.08676884  |
| Cu | 1.27763505  | 3.68884344 | 2.08655752  |
| Cu | 3.83222486  | 3.69250576 | 2.08483511  |
| Cu | 6.39182021  | 3.69263055 | 2.08500769  |
| Cu | -2.55438759 | 5.90097441 | 2.08501749  |
| Cu | -0.00001146 | 5.90258655 | 2.08694649  |
| Cu | 2.55394223  | 5.90144705 | 2.08735380  |
| Cu | 5.11200202  | 5.89684226 | 2.07876404  |
| Cu | -3.82965223 | 8.11918019 | 2.07817560  |

|    |             |            |            |
|----|-------------|------------|------------|
| Cu | -1.28064952 | 8.11336475 | 2.08288249 |
| Cu | 1.28107758  | 8.11405392 | 2.08482823 |
| Cu | 3.82899047  | 8.11851686 | 2.07999994 |
| Cu | 1.27031216  | 0.72825213 | 4.17662564 |
| Cu | 3.83399008  | 0.73760861 | 4.15119258 |
| Cu | 6.39071323  | 0.73878859 | 4.15528980 |
| Cu | 8.95426290  | 0.72803816 | 4.17648369 |
| Cu | -0.00036927 | 2.95213447 | 4.16796521 |
| Cu | 2.55468391  | 2.95169331 | 4.15711436 |
| Cu | 5.11346133  | 2.95093436 | 4.15202397 |
| Cu | 7.66778830  | 2.95091849 | 4.16043055 |
| Cu | -1.27769921 | 5.16266706 | 4.16521404 |
| Cu | 1.27780803  | 5.16364360 | 4.16827720 |
| Cu | 3.83787733  | 5.17510820 | 4.17707449 |
| Cu | 6.38720421  | 5.17522268 | 4.17690566 |
| Cu | -2.56731382 | 7.37360369 | 4.17225987 |
| Cu | 0.00090870  | 7.37720890 | 4.15416181 |
| Cu | 2.56748605  | 7.37463629 | 4.17727271 |
| Cu | 5.11255709  | 7.37681126 | 4.13191723 |
| Cu | 2.57655899  | 0.00711966 | 6.22957463 |
| Cu | 7.64860320  | 0.01077817 | 6.23539753 |
| Cu | 6.38563154  | 6.64221696 | 6.29626577 |
| Cu | -5.11240151 | 8.84420881 | 6.29488044 |
| Cu | 8.94697759  | 2.21143184 | 6.24077136 |
| Cu | 3.84073774  | 6.64286145 | 6.29676974 |
| Cu | 2.55597116  | 4.42881717 | 6.24440012 |
| Cu | -0.00027875 | 4.42634915 | 6.25093112 |
| Cu | 3.83200158  | 2.21643554 | 6.22803341 |
| Cu | -1.27689646 | 6.63737981 | 6.23759423 |
| Cu | 0.00198731  | 8.85120421 | 6.22982928 |
| Cu | 1.27524963  | 2.21147820 | 6.23952772 |
| Cu | 6.38953120  | 2.21543463 | 6.24571380 |
| Cu | 1.27722263  | 6.63874143 | 6.24361396 |
| Cu | -2.55421325 | 4.42755818 | 6.24347138 |
| Cu | 5.11282695  | 4.40152178 | 6.23774564 |

Str 5

Free energy from VASP is -328.45969500 eV

|            |            |            |            |           |           |
|------------|------------|------------|------------|-----------|-----------|
| PBC        | 10.223900  | 10.223900  | 20.000000  | 90.000000 | 90.000000 |
| 120.000000 |            |            |            |           |           |
| H          | 3.85636566 | 5.15592326 | 7.24168009 |           |           |
| H          | 0.44748235 | 7.33659282 | 8.82923624 |           |           |
| H          | 2.36688496 | 3.72072307 | 9.03560459 |           |           |

|    |             |            |             |
|----|-------------|------------|-------------|
| H  | 2.35903231  | 2.14400099 | 11.01331194 |
| H  | 1.98373804  | 1.21775575 | 8.72514396  |
| H  | 1.79532918  | 3.79158925 | 11.41108122 |
| H  | 0.23182292  | 1.51112597 | 8.75840380  |
| H  | 0.14049972  | 1.52360049 | 11.02890700 |
| H  | -0.37015685 | 3.86346430 | 9.72833886  |
| H  | 0.77053440  | 5.78543552 | 8.90398992  |
| C  | 1.44505025  | 3.20279521 | 9.34489393  |
| C  | 1.55405930  | 2.88055669 | 10.84513487 |
| C  | 1.20383736  | 1.96319004 | 8.49651670  |
| O  | 0.37715121  | 4.18036791 | 9.17935207  |
| O  | 0.29779227  | 2.42309212 | 11.37049013 |
| O  | 1.12231785  | 6.67311366 | 8.59378194  |
| Cu | 10.21970541 | 0.00474158 | 0.00109052  |
| Cu | 2.55570584  | 0.00192151 | 19.99766900 |
| Cu | 0.00009755  | 8.85216912 | 19.99250826 |
| Cu | 7.66261730  | 0.00099499 | 19.99624368 |
| Cu | -1.27952869 | 2.21860190 | 19.99474901 |
| Cu | 1.27252472  | 2.21871501 | 0.01004402  |
| Cu | 3.83125794  | 2.21295344 | 19.98639448 |
| Cu | 6.39013768  | 2.21552415 | 19.98204191 |
| Cu | -2.55680751 | 4.42916313 | 19.99366618 |
| Cu | -0.00338876 | 4.43099564 | 0.01301965  |
| Cu | 2.55110830  | 4.43240854 | 0.01306099  |
| Cu | 5.11158525  | 4.43013859 | 19.99607824 |
| Cu | -3.83247543 | 6.64226784 | 19.99331363 |
| Cu | -1.27595858 | 6.64319295 | 0.00328789  |
| Cu | 1.27062434  | 6.64676083 | 0.00638541  |
| Cu | 3.82764727  | 6.64309520 | 0.00636447  |
| Cu | -0.00600599 | 1.48625540 | 2.08729160  |
| Cu | 2.54759473  | 1.48747565 | 2.07823037  |
| Cu | 5.10867289  | 1.48400045 | 2.06589454  |
| Cu | 7.66309521  | 1.48144276 | 2.07042745  |
| Cu | -1.27760378 | 3.69394512 | 2.09338057  |
| Cu | 1.27160435  | 3.70197817 | 2.11361271  |
| Cu | 3.82383726  | 3.68605175 | 2.07542696  |
| Cu | 6.38749135  | 3.69220382 | 2.07081996  |
| Cu | -2.55824732 | 5.90310487 | 2.08424131  |
| Cu | 0.00164625  | 5.90453518 | 2.10709089  |
| Cu | 2.53894537  | 5.91035233 | 2.09777051  |
| Cu | 5.10967384  | 5.90913400 | 2.06927314  |
| Cu | -3.84419289 | 8.12571197 | 2.07940491  |
| Cu | -1.27451704 | 8.11905068 | 2.08090213  |
| Cu | 1.27723179  | 8.11816399 | 2.09260905  |

|    |             |            |            |
|----|-------------|------------|------------|
| Cu | 3.81989375  | 8.11915906 | 2.09296045 |
| Cu | 1.26835504  | 0.76596192 | 4.17157107 |
| Cu | 3.82262597  | 0.75004734 | 4.13399887 |
| Cu | 6.38375345  | 0.74756750 | 4.13879904 |
| Cu | 8.93907017  | 0.74726055 | 4.15329999 |
| Cu | 0.01211039  | 2.94904102 | 4.20874025 |
| Cu | 2.52788508  | 2.95435665 | 4.20886335 |
| Cu | 5.09787235  | 2.96902162 | 4.15631070 |
| Cu | 7.66565439  | 2.95669926 | 4.15252815 |
| Cu | -1.27661545 | 5.16416809 | 4.16889355 |
| Cu | 1.27583301  | 5.17858272 | 4.24416062 |
| Cu | 3.82494820  | 5.16474977 | 4.12149137 |
| Cu | 6.37127280  | 5.16668909 | 4.15655897 |
| Cu | -2.56429888 | 7.39039270 | 4.13875587 |
| Cu | 0.00963298  | 7.37745295 | 4.18305280 |
| Cu | 2.53997648  | 7.36245269 | 4.21698879 |
| Cu | 5.09613597  | 7.37528930 | 4.16228581 |
| Cu | 8.91602404  | 2.21324066 | 6.23142336 |
| Cu | 3.84299358  | 2.19485223 | 6.21284653 |
| Cu | 2.58818990  | 4.43421106 | 6.26544129 |
| Cu | -1.30676209 | 6.64947498 | 6.21650539 |
| Cu | 1.26012063  | 2.20533256 | 6.48265144 |
| Cu | 5.11236306  | 4.43376230 | 6.28224846 |
| Cu | -0.02661103 | 4.42090117 | 6.27330228 |
| Cu | 7.65027652  | 4.43137938 | 6.22445853 |
| Cu | 5.08905115  | 8.84462200 | 6.20557485 |
| Cu | 3.84869661  | 6.63126127 | 6.28573849 |
| Cu | 6.38157286  | 2.22493780 | 6.22406997 |
| Cu | -2.55512749 | 8.85363079 | 6.20697500 |
| Cu | 7.65898237  | 0.01739710 | 6.21931592 |
| Cu | 5.10068498  | 0.02624708 | 6.20468593 |
| Cu | 1.24598012  | 6.66524246 | 6.39740848 |
| Cu | -3.82048460 | 6.65610590 | 6.21687274 |

Str 6

Free energy from VASP is -328.03457400 eV

|            |            |            |             |           |           |
|------------|------------|------------|-------------|-----------|-----------|
| PBC        | 10.223900  | 10.223900  | 20.000000   | 90.000000 | 90.000000 |
| 120.000000 |            |            |             |           |           |
| H          | 3.08991344 | 3.79401319 | 8.94383019  |           |           |
| H          | 3.46367717 | 1.54600804 | 8.72561869  |           |           |
| H          | 1.59664376 | 2.80518994 | 10.17234878 |           |           |
| H          | 0.65139041 | 7.15818934 | 9.12796431  |           |           |
| H          | 0.17932056 | 4.09380247 | 8.76288658  |           |           |

|    |             |            |             |
|----|-------------|------------|-------------|
| H  | 2.32077718  | 7.30978474 | 8.52659034  |
| H  | -0.09545086 | 5.10295639 | 10.21282303 |
| H  | 2.37265897  | 5.61891002 | 10.25570799 |
| H  | 0.20020524  | 6.11178433 | 7.42234875  |
| H  | 4.12411192  | 1.92024497 | 10.09863633 |
| C  | 1.84214241  | 5.35428186 | 9.31813379  |
| C  | 1.46099026  | 6.63080436 | 8.61190516  |
| C  | 0.64894379  | 4.47762129 | 9.69758361  |
| O  | 2.80223407  | 4.63273646 | 8.49580956  |
| O  | 3.35257706  | 2.10244587 | 9.53147692  |
| O  | 0.96907783  | 3.42581675 | 10.59577568 |
| Cu | 0.00370380  | 0.00117560 | 0.00872804  |
| Cu | 2.55709173  | 0.00157365 | 0.00985177  |
| Cu | 5.11463396  | 0.00084607 | 0.00700898  |
| Cu | 7.67205638  | 0.00095052 | 0.00594050  |
| Cu | 8.94787825  | 2.21457823 | 0.00496665  |
| Cu | 1.28027663  | 2.21368533 | 0.00587088  |
| Cu | 3.83671952  | 2.21535927 | 0.00230959  |
| Cu | 6.39388577  | 2.21595137 | -0.00300374 |
| Cu | -2.55396836 | 4.42659053 | 0.00447551  |
| Cu | 0.00273663  | 4.42922320 | 0.01615511  |
| Cu | 2.55798348  | 4.42860711 | 0.01352579  |
| Cu | 5.11564780  | 4.42717068 | -0.00005738 |
| Cu | 6.39190030  | 6.64183514 | 0.00798479  |
| Cu | -1.27412336 | 6.64025271 | 0.01420115  |
| Cu | 1.28102409  | 6.63975002 | 0.02171229  |
| Cu | 3.83577928  | 6.64188055 | 0.00946489  |
| Cu | 0.00627153  | 1.48212038 | 2.08841224  |
| Cu | 2.56063806  | 1.48753843 | 2.09007687  |
| Cu | 5.11878277  | 1.47666004 | 2.08038067  |
| Cu | 7.67218473  | 1.47953828 | 2.08427982  |
| Cu | -1.27093051 | 3.69186714 | 2.09498719  |
| Cu | 1.28372525  | 3.69935254 | 2.10634198  |
| Cu | 3.83722701  | 3.69352037 | 2.08940608  |
| Cu | 6.39650941  | 3.69229674 | 2.08123509  |
| Cu | -2.54761578 | 5.90652979 | 2.09321961  |
| Cu | 0.01117514  | 5.90150125 | 2.11449913  |
| Cu | 2.55964787  | 5.90409700 | 2.10839317  |
| Cu | 5.11258777  | 5.90016596 | 2.09250628  |
| Cu | -3.82593302 | 8.11768890 | 2.08854022  |
| Cu | -1.26544085 | 8.11207809 | 2.09388226  |
| Cu | 1.28543844  | 8.11681087 | 2.09554097  |
| Cu | 3.83158444  | 8.11410392 | 2.10092752  |
| Cu | 1.29211199  | 0.74229081 | 4.15481507  |

|    |             |            |            |
|----|-------------|------------|------------|
| Cu | 3.84000392  | 0.73796398 | 4.14480416 |
| Cu | 6.39791455  | 0.74300729 | 4.15789686 |
| Cu | 8.96256495  | 0.74531511 | 4.15369760 |
| Cu | 0.01120004  | 2.96961535 | 4.17763532 |
| Cu | 2.56478623  | 2.97502242 | 4.18971722 |
| Cu | 5.12365751  | 2.95435656 | 4.15359777 |
| Cu | 7.67673980  | 2.95556704 | 4.16397737 |
| Cu | -1.26242502 | 5.17372712 | 4.17750308 |
| Cu | 1.30259249  | 5.17770803 | 4.24493011 |
| Cu | 3.83305465  | 5.16048577 | 4.18936480 |
| Cu | 6.40265719  | 5.17323558 | 4.15798858 |
| Cu | -2.52936297 | 7.38064235 | 4.17639349 |
| Cu | 0.02685658  | 7.37416097 | 4.20645552 |
| Cu | 2.54068478  | 7.36987062 | 4.20921725 |
| Cu | 5.12943311  | 7.38574649 | 4.15406439 |
| Cu | 2.57934457  | 0.00911879 | 6.25028879 |
| Cu | 7.69708945  | 0.04136679 | 6.21209346 |
| Cu | -1.25526570 | 6.64134774 | 6.29528640 |
| Cu | 5.11990329  | 0.04896162 | 6.22853614 |
| Cu | 1.32750287  | 6.67444296 | 6.43846333 |
| Cu | 3.86420081  | 2.20141904 | 6.21490748 |
| Cu | 6.41229176  | 2.22568635 | 6.24849076 |
| Cu | -1.25936859 | 2.22288575 | 6.24514218 |
| Cu | 1.28851205  | 2.20728652 | 6.22819386 |
| Cu | 3.89070448  | 6.66589100 | 6.20358916 |
| Cu | 5.16498384  | 4.42661933 | 6.21931139 |
| Cu | -2.54480547 | 4.43177568 | 6.24517478 |
| Cu | 0.02748073  | 0.01253118 | 6.24104214 |
| Cu | 2.60926578  | 4.40746003 | 6.35462629 |
| Cu | -0.01124697 | 4.43641372 | 6.28057941 |
| Cu | -3.80227779 | 6.65296844 | 6.24189973 |

Str 7

Free energy from VASP is -329.44101400 eV

|            |            |            |             |           |           |
|------------|------------|------------|-------------|-----------|-----------|
| PBC        | 10.223900  | 10.223900  | 20.000000   | 90.000000 | 90.000000 |
| 120.000000 |            |            |             |           |           |
| H          | 1.03598457 | 1.20423790 | 8.59718619  |           |           |
| H          | 2.83900058 | 7.21080868 | 9.62265514  |           |           |
| H          | 2.33526895 | 3.13306881 | 9.66778464  |           |           |
| H          | 4.20728410 | 6.11285542 | 9.92660468  |           |           |
| H          | 0.55888029 | 6.27800600 | 9.20461303  |           |           |
| H          | 2.93893787 | 6.29537281 | 11.16192062 |           |           |
| H          | 0.53636850 | 5.13322204 | 10.58669760 |           |           |



|    |             |            |             |
|----|-------------|------------|-------------|
| H  | 0.27680859  | 3.43147690 | 8.99980615  |
| H  | 0.88904866  | 1.19260048 | 10.16770073 |
| H  | 2.61060222  | 5.10445803 | 8.33703065  |
| C  | 2.37005445  | 5.10339973 | 9.44001376  |
| C  | 3.12859422  | 6.25408272 | 10.07956619 |
| C  | 0.85464823  | 5.27226326 | 9.53870434  |
| O  | 2.82816338  | 3.89918847 | 10.03720662 |
| O  | 1.02126461  | 1.77707411 | 9.40045086  |
| O  | 0.11684798  | 4.35649089 | 8.69143886  |
| Cu | 10.22364868 | 0.00007844 | 0.00495902  |
| Cu | -2.55524295 | 8.85373875 | 0.00434309  |
| Cu | 5.11212969  | 0.00049225 | 0.00389059  |
| Cu | 7.66758463  | 0.00021738 | 0.00440042  |
| Cu | -1.27839707 | 2.21443242 | 0.00493334  |
| Cu | 1.27773295  | 2.21434347 | 0.00459320  |
| Cu | 3.83523655  | 2.21353467 | 0.00197383  |
| Cu | 6.38970196  | 2.21387198 | 0.00327777  |
| Cu | 7.66800968  | 4.42693021 | 0.00537097  |
| Cu | 0.00011782  | 4.42754206 | 0.00411261  |
| Cu | 2.55534271  | 4.42754895 | 0.00387282  |
| Cu | 5.11257703  | 4.42670236 | 0.00353503  |
| Cu | -3.83322512 | 6.63970298 | 0.00427077  |
| Cu | -1.27779167 | 6.63996055 | 0.00426915  |
| Cu | 1.27762361  | 6.63971877 | 0.00448686  |
| Cu | 3.83366778  | 6.64033655 | 0.00320745  |
| Cu | -0.00068927 | 1.48294777 | 2.09245600  |
| Cu | 2.55739922  | 1.47671073 | 2.08506748  |
| Cu | 5.11208910  | 1.47587615 | 2.08778474  |
| Cu | 7.66734966  | 1.47659534 | 2.08726817  |
| Cu | -1.27668988 | 3.69162621 | 2.09472991  |
| Cu | 1.27629181  | 3.69105870 | 2.09122911  |
| Cu | 3.83508604  | 3.68968998 | 2.08515619  |
| Cu | 6.39040934  | 3.68949889 | 2.08967816  |
| Cu | -2.54925601 | 5.89927326 | 2.09654271  |
| Cu | -0.00031641 | 5.89992002 | 2.09513340  |
| Cu | 2.55089193  | 5.89982275 | 2.09396244  |
| Cu | 5.11258245  | 5.90282237 | 2.08577360  |
| Cu | -3.83373497 | 8.11418853 | 2.08153530  |
| Cu | -1.27813529 | 8.11602515 | 2.08540093  |
| Cu | 1.27817189  | 8.11645606 | 2.08836745  |
| Cu | 3.83459185  | 8.11540999 | 2.08431021  |
| Cu | 1.27816836  | 0.73271105 | 4.15068513  |
| Cu | 3.83305140  | 0.73692690 | 4.16738415  |
| Cu | 6.39138488  | 0.73968359 | 4.16822928  |

|    |             |            |            |
|----|-------------|------------|------------|
| Cu | 8.94994076  | 0.73771716 | 4.16141782 |
| Cu | -0.00037083 | 2.97341644 | 4.19480308 |
| Cu | 2.56180370  | 2.95351998 | 4.15789815 |
| Cu | 5.11412613  | 2.95207365 | 4.16825614 |
| Cu | 7.66847952  | 2.95205422 | 4.16704926 |
| Cu | -1.25858816 | 5.15688780 | 4.20811079 |
| Cu | 1.26307759  | 5.15673404 | 4.19829047 |
| Cu | 3.83874308  | 5.16875968 | 4.16121870 |
| Cu | 6.39511047  | 5.16923116 | 4.16602960 |
| Cu | -2.55640173 | 7.38031022 | 4.16393069 |
| Cu | -0.00217170 | 7.38311385 | 4.16020431 |
| Cu | 2.56088185  | 7.38044327 | 4.16046527 |
| Cu | 5.11672869  | 7.38181040 | 4.16253299 |
| Cu | 7.67578086  | 0.00718194 | 6.25439340 |
| Cu | 5.12691282  | 4.43118851 | 6.24825586 |
| Cu | 3.84754259  | 6.65557949 | 6.23548071 |
| Cu | 2.57941784  | 4.43235507 | 6.22516294 |
| Cu | 2.55409463  | 0.00579943 | 6.26429118 |
| Cu | 7.66589738  | 4.42930466 | 6.24582627 |
| Cu | 3.84295019  | 2.21362283 | 6.25206337 |
| Cu | 8.94521709  | 2.20454720 | 6.23593070 |
| Cu | 5.11485628  | 0.00860908 | 6.25436177 |
| Cu | 6.39546378  | 2.21506400 | 6.25367056 |
| Cu | -3.82897722 | 6.64823352 | 6.25604823 |
| Cu | 1.28355932  | 6.67268471 | 6.21584628 |
| Cu | 1.29340111  | 2.20093437 | 6.20347893 |
| Cu | -1.27847357 | 6.66156553 | 6.23904403 |
| Cu | 0.01437255  | 4.43332327 | 6.41347691 |
| Cu | 0.01022543  | 0.00649629 | 6.26005713 |

#### 4. 1,3-PDO-dehydration path

Str 1

Free energy from VASP is -328.39379400 eV

|     |           |           |           |           |           |
|-----|-----------|-----------|-----------|-----------|-----------|
| PBC | 10.223900 | 10.223900 | 20.000000 | 90.000000 | 90.000000 |
|-----|-----------|-----------|-----------|-----------|-----------|

120.000000

|    |             |            |             |
|----|-------------|------------|-------------|
| H  | 2.56691945  | 1.43923141 | 7.25711903  |
| H  | -0.04377945 | 2.94207071 | 7.26393275  |
| H  | 1.94551802  | 5.59350670 | 11.35439436 |
| H  | 1.76263090  | 6.24853554 | 8.99010230  |
| H  | 2.17365364  | 3.79615525 | 9.64350942  |
| H  | 2.56244699  | 7.54714549 | 9.93089289  |
| H  | 3.10591426  | 3.43031148 | 11.13626072 |
| H  | 4.74420331  | 5.94699531 | 11.06855044 |
| H  | 4.19671842  | 5.57640868 | 8.76773784  |
| H  | 4.16467228  | 3.36776412 | 8.77649582  |
| C  | 2.85629577  | 5.54905729 | 10.73368286 |
| C  | 2.67251270  | 6.51886758 | 9.55972649  |
| C  | 3.03096740  | 4.10086297 | 10.26669922 |
| O  | 3.92418748  | 5.94984188 | 11.59620540 |
| O  | 3.83227244  | 6.50257320 | 8.68242509  |
| O  | 4.26507973  | 4.02136705 | 9.50131530  |
| Cu | 5.10835498  | 8.84704951 | 0.00127886  |
| Cu | -2.55543284 | 8.85212949 | 0.00592344  |
| Cu | 0.00152531  | 8.85223995 | 0.00382139  |
| Cu | 2.55532374  | 8.85039728 | 0.00186300  |
| Cu | 8.94196113  | 2.21496390 | 0.00537177  |
| Cu | 1.27766833  | 2.21275799 | 0.01181878  |
| Cu | 3.83527190  | 2.21290275 | 0.00614283  |
| Cu | 6.39109844  | 2.21514433 | 0.00009607  |
| Cu | 7.66517761  | 4.42851017 | 0.00553876  |
| Cu | -0.00407226 | 4.42907591 | 0.00459696  |
| Cu | 2.55961507  | 4.43283322 | 0.00119318  |
| Cu | 5.11424490  | 4.43011061 | 0.00250585  |
| Cu | 6.38824836  | 6.63671419 | 0.00238845  |
| Cu | -1.27942586 | 6.63810758 | 19.99957806 |
| Cu | 1.28003365  | 6.64250111 | 0.00191010  |
| Cu | 3.83422949  | 6.64042098 | 0.00235666  |
| Cu | -0.00423426 | 1.47161580 | 2.07977278  |
| Cu | 2.55589452  | 1.47251059 | 2.08560339  |
| Cu | 5.11418136  | 1.47617222 | 2.08145297  |
| Cu | 7.66551325  | 1.47261319 | 2.08871219  |
| Cu | -1.27891381 | 3.68798736 | 2.08911201  |
| Cu | 1.27788053  | 3.69337579 | 2.07727849  |
| Cu | 3.83334997  | 3.69403090 | 2.09033757  |

|    |             |            |            |
|----|-------------|------------|------------|
| Cu | 6.38841629  | 3.68404943 | 2.09613188 |
| Cu | -2.55303085 | 5.90494884 | 2.09663548 |
| Cu | -0.00047430 | 5.90443256 | 2.08853882 |
| Cu | 2.55339313  | 5.90226380 | 2.09608390 |
| Cu | 5.10910155  | 5.90458536 | 2.09220622 |
| Cu | -3.83943831 | 8.11244607 | 2.09396081 |
| Cu | -1.27932440 | 8.11161499 | 2.08182064 |
| Cu | 1.28246514  | 8.11275440 | 2.09833809 |
| Cu | 3.83285494  | 8.11634263 | 2.09794856 |
| Cu | 1.27193739  | 0.74587709 | 4.17299303 |
| Cu | 3.83142993  | 0.73273696 | 4.15585214 |
| Cu | 6.38460431  | 0.73703332 | 4.16401753 |
| Cu | 8.94420544  | 0.74866030 | 4.17545024 |
| Cu | 0.01492573  | 2.93748268 | 4.15676738 |
| Cu | 2.54133091  | 2.94105598 | 4.16509683 |
| Cu | 5.08758403  | 2.93410405 | 4.17473073 |
| Cu | 7.67532782  | 2.94732979 | 4.17646723 |
| Cu | -1.27503493 | 5.14946691 | 4.17670800 |
| Cu | 1.26190231  | 5.15132609 | 4.17196157 |
| Cu | 3.83398467  | 5.17622035 | 4.18245299 |
| Cu | 6.39091061  | 5.15895545 | 4.15547868 |
| Cu | -2.55990830 | 7.39575798 | 4.17958269 |
| Cu | -0.00770047 | 7.37607806 | 4.16226879 |
| Cu | 2.56593376  | 7.36622985 | 4.19529103 |
| Cu | 5.09781619  | 7.36443810 | 4.19058329 |
| Cu | -1.29035035 | 6.62612545 | 6.24104059 |
| Cu | 3.80857431  | 6.63558855 | 6.39840559 |
| Cu | 2.55384290  | 4.42880453 | 6.20207207 |
| Cu | 1.26352078  | 2.20016581 | 6.38378922 |
| Cu | 1.24265767  | 6.62351804 | 6.22606784 |
| Cu | 7.63890418  | 4.42503411 | 6.24229195 |
| Cu | 8.93798225  | 2.20835420 | 6.29049756 |
| Cu | -0.01321614 | 4.40110437 | 6.29540073 |
| Cu | 3.81436428  | 2.19427375 | 6.29373834 |
| Cu | 5.08698574  | 8.82344876 | 6.21786136 |
| Cu | 7.64714502  | 0.00655731 | 6.23065635 |
| Cu | -2.56704074 | 8.84244127 | 6.28868698 |
| Cu | 6.38916387  | 6.62419146 | 6.23020158 |
| Cu | 0.00252283  | 8.83265511 | 6.23671930 |
| Cu | 5.10719284  | 4.39874502 | 6.21703056 |
| Cu | 6.37317998  | 2.20179951 | 6.24412414 |

Free energy from VASP is -327.61250800 eV

| PBC        | 10.223900   | 10.223900  | 20.000000   | 90.000000 | 90.000000 |
|------------|-------------|------------|-------------|-----------|-----------|
| 120.000000 |             |            |             |           |           |
| H          | 1.90929166  | 5.85345239 | 9.22242785  |           |           |
| H          | 1.80301577  | 4.62822239 | 7.93863158  |           |           |
| H          | 2.55322887  | 4.62634726 | 11.12465670 |           |           |
| H          | 3.21111864  | 2.62979439 | 8.88980700  |           |           |
| H          | 4.51889806  | 4.88820423 | 8.76152877  |           |           |
| H          | 3.92478997  | 2.57168954 | 10.52031635 |           |           |
| H          | 4.91276785  | 5.03625008 | 10.50620582 |           |           |
| H          | -1.29688721 | 3.68084890 | 7.24092131  |           |           |
| H          | 4.15551149  | 7.02220119 | 8.96133507  |           |           |
| H          | 1.15162637  | 2.33831277 | 9.95206780  |           |           |
| C          | 2.88562568  | 4.39015593 | 10.10144563 |           |           |
| C          | 3.03501307  | 2.88652150 | 9.95315777  |           |           |
| C          | 4.12832601  | 5.19934365 | 9.74773441  |           |           |
| O          | 1.77075893  | 4.86772865 | 9.23671538  |           |           |
| O          | 1.93878323  | 2.16251529 | 10.49767662 |           |           |
| O          | 3.72353756  | 6.57605790 | 9.72035543  |           |           |
| Cu         | 5.11416412  | 8.85310367 | 19.98109789 |           |           |
| Cu         | -2.55382651 | 8.85585100 | 19.97774993 |           |           |
| Cu         | 0.00032452  | 8.85734478 | 19.97044293 |           |           |
| Cu         | 2.55831442  | 8.85394984 | 19.97234552 |           |           |
| Cu         | 8.94659073  | 2.21639048 | -0.01121834 |           |           |
| Cu         | 1.28197955  | 2.21294773 | -0.01261144 |           |           |
| Cu         | 3.83591587  | 2.21289126 | 19.97639748 |           |           |
| Cu         | 6.39040673  | 2.21387307 | 19.97452356 |           |           |
| Cu         | 7.67086155  | 4.42910755 | 19.98842523 |           |           |
| Cu         | 0.00107289  | 4.42870594 | -0.00373031 |           |           |
| Cu         | 2.55923970  | 4.43079275 | 19.99004407 |           |           |
| Cu         | 5.11214690  | 4.43201681 | 19.97859591 |           |           |
| Cu         | 6.38995902  | 6.64400810 | -0.01536613 |           |           |
| Cu         | -1.27868451 | 6.64594957 | 19.98206202 |           |           |
| Cu         | 1.28273178  | 6.64390543 | 19.98427088 |           |           |
| Cu         | 3.83689802  | 6.64262071 | -0.00637720 |           |           |
| Cu         | 0.00240930  | 1.47806015 | 2.06443601  |           |           |
| Cu         | 2.55834363  | 1.47911401 | 2.06398386  |           |           |
| Cu         | 5.11441792  | 1.47923020 | 2.05861806  |           |           |
| Cu         | 7.67075843  | 1.47565074 | 2.05662981  |           |           |
| Cu         | -1.27492098 | 3.69274246 | 2.07178457  |           |           |
| Cu         | 1.28305921  | 3.69292415 | 2.06993529  |           |           |
| Cu         | 3.83780517  | 3.68988629 | 2.05982455  |           |           |
| Cu         | 6.38976658  | 3.69366739 | 2.05761708  |           |           |
| Cu         | -2.55097723 | 5.90525467 | 2.06697520  |           |           |

|    |             |            |            |
|----|-------------|------------|------------|
| Cu | 0.00342301  | 5.90831133 | 2.06499275 |
| Cu | 2.55389140  | 5.90271331 | 2.07245992 |
| Cu | 5.11802575  | 5.90112676 | 2.07397699 |
| Cu | -3.82853821 | 8.12150058 | 2.06583695 |
| Cu | -1.27261924 | 8.11860689 | 2.06263024 |
| Cu | 1.27851119  | 8.12135465 | 2.05601829 |
| Cu | 3.83460705  | 8.12531771 | 2.06840709 |
| Cu | 1.27944554  | 0.74493793 | 4.14673411 |
| Cu | 3.83721696  | 0.74112042 | 4.14037629 |
| Cu | 6.39667615  | 0.73982115 | 4.13610834 |
| Cu | 8.94990022  | 0.76478217 | 4.16387024 |
| Cu | 0.00494587  | 2.96115861 | 4.15550191 |
| Cu | 2.55992403  | 2.96496927 | 4.14698063 |
| Cu | 5.11376158  | 2.95958399 | 4.13549792 |
| Cu | 7.67221974  | 2.95526440 | 4.13541119 |
| Cu | -1.25978516 | 5.16233418 | 4.16078792 |
| Cu | 1.26267248  | 5.15495879 | 4.16847400 |
| Cu | 3.82325750  | 5.16491781 | 4.14629004 |
| Cu | 6.41654687  | 5.15802559 | 4.16128788 |
| Cu | -2.55243123 | 7.37934589 | 4.14045241 |
| Cu | 0.01122333  | 7.37826823 | 4.14502221 |
| Cu | 2.55804637  | 7.37868913 | 4.13363040 |
| Cu | 5.11237081  | 7.38011660 | 4.13220903 |
| Cu | 3.84164433  | 2.21865255 | 6.21014433 |
| Cu | 2.53493870  | 4.43584748 | 6.28967178 |
| Cu | -2.55041442 | 8.85553476 | 6.21967033 |
| Cu | 5.11637717  | 4.43248946 | 6.20136122 |
| Cu | 1.28852655  | 6.63686888 | 6.22974564 |
| Cu | 6.37884775  | 2.20898626 | 6.20290097 |
| Cu | 8.94952289  | 2.22125566 | 6.28178744 |
| Cu | 3.84137678  | 6.65044456 | 6.20779346 |
| Cu | 6.39095558  | 6.64325374 | 6.21765902 |
| Cu | -1.27197001 | 6.66283784 | 6.21091169 |
| Cu | 7.67265161  | 0.00180520 | 6.21615652 |
| Cu | 10.22572927 | 0.00141890 | 6.22305583 |
| Cu | 0.03349349  | 4.42590934 | 6.38223534 |
| Cu | 5.12001429  | 0.00086378 | 6.21776618 |
| Cu | 7.68496820  | 4.42995113 | 6.27808979 |
| Cu | 1.30263746  | 2.20286557 | 6.22095993 |

Str 3

Free energy from VASP is -327.65664800 eV

|     |           |           |           |           |           |
|-----|-----------|-----------|-----------|-----------|-----------|
| PBC | 10.223900 | 10.223900 | 20.000000 | 90.000000 | 90.000000 |
|-----|-----------|-----------|-----------|-----------|-----------|

120.000000

|    |             |            |             |
|----|-------------|------------|-------------|
| H  | 3.30615826  | 6.44492500 | 9.18135047  |
| H  | 2.37805109  | 5.33564790 | 8.34226188  |
| H  | 3.18900038  | 4.89135801 | 11.09600215 |
| H  | 3.64815822  | 3.10234589 | 8.62974467  |
| H  | 5.35448241  | 4.72992863 | 8.89412169  |
| H  | 3.90231518  | 2.65785111 | 10.33492914 |
| H  | 5.56676875  | 5.14979685 | 10.63238998 |
| H  | -1.28462492 | 3.68619659 | 7.21477680  |
| H  | 5.15192597  | 6.85014576 | 8.54919188  |
| H  | 1.52946118  | 2.80041721 | 8.89802584  |
| C  | 3.48830437  | 4.71879251 | 10.05409094 |
| C  | 3.27523563  | 3.26547333 | 9.65785009  |
| C  | 4.91161660  | 5.25380056 | 9.75830040  |
| O  | 2.58603215  | 5.65205122 | 9.29728281  |
| O  | 1.92573281  | 2.85693144 | 9.79423557  |
| O  | 4.75007046  | 6.66006671 | 9.44216181  |
| Cu | 5.11518484  | 8.84106039 | 19.93681415 |
| Cu | -2.55006546 | 8.84306793 | 19.93030122 |
| Cu | 0.00132920  | 8.84411062 | 19.93073087 |
| Cu | 2.55861073  | 8.84204987 | 19.93779667 |
| Cu | 8.94835394  | 2.20309448 | 19.95598128 |
| Cu | 1.28265702  | 2.19909804 | 19.94281529 |
| Cu | 3.83820837  | 2.19784902 | 19.92871810 |
| Cu | 6.39241927  | 2.19984645 | 19.94237922 |
| Cu | 7.67333390  | 4.41405809 | 19.95081576 |
| Cu | 0.00045690  | 4.41428173 | 19.95160941 |
| Cu | 2.56004534  | 4.41734879 | 19.93157125 |
| Cu | 5.11542494  | 4.41690858 | 19.92968719 |
| Cu | 6.39256883  | 6.63100751 | 19.93226301 |
| Cu | -1.27546992 | 6.63205789 | 19.93816158 |
| Cu | 1.28217617  | 6.63138219 | 19.93353056 |
| Cu | 3.83733181  | 6.63033433 | 19.94468193 |
| Cu | 0.00226231  | 1.46382313 | 2.02800539  |
| Cu | 2.55890396  | 1.46347308 | 2.01795135  |
| Cu | 5.11520568  | 1.46471115 | 2.02118338  |
| Cu | 7.67190038  | 1.46377617 | 2.03056877  |
| Cu | -1.27585659 | 3.68136840 | 2.03635651  |
| Cu | 1.28205412  | 3.67998210 | 2.01962213  |
| Cu | 3.83819735  | 3.67564380 | 2.00467313  |
| Cu | 6.39168837  | 3.68106092 | 2.02185677  |
| Cu | -2.55249511 | 5.89452271 | 2.02359555  |
| Cu | 0.00212489  | 5.89567541 | 2.02197590  |
| Cu | 2.55134827  | 5.89057900 | 2.01862801  |

|    |             |            |            |
|----|-------------|------------|------------|
| Cu | 5.12236502  | 5.89053309 | 2.01847188 |
| Cu | -3.82762828 | 8.10730882 | 2.01656403 |
| Cu | -1.27414479 | 8.10512797 | 2.02015583 |
| Cu | 1.27742931  | 8.10834974 | 2.01736877 |
| Cu | 3.83629032  | 8.11511544 | 2.02545113 |
| Cu | 1.27923454  | 0.72435900 | 4.09733145 |
| Cu | 3.83564448  | 0.72299107 | 4.09590240 |
| Cu | 6.39527035  | 0.72370467 | 4.09916290 |
| Cu | 8.95117837  | 0.75169207 | 4.13858572 |
| Cu | 0.00169666  | 2.94373242 | 4.10825948 |
| Cu | 2.55886429  | 2.94569109 | 4.08298701 |
| Cu | 5.11392121  | 2.94513111 | 4.08659916 |
| Cu | 7.67305808  | 2.94249829 | 4.10931044 |
| Cu | -1.27141198 | 5.15176632 | 4.11467254 |
| Cu | 1.25724764  | 5.14211432 | 4.11667270 |
| Cu | 3.83422062  | 5.15524397 | 4.07030641 |
| Cu | 6.41650166  | 5.14573650 | 4.11959060 |
| Cu | -2.55533419 | 7.36662722 | 4.09718624 |
| Cu | 0.00764919  | 7.36463093 | 4.09959671 |
| Cu | 2.55926537  | 7.36741097 | 4.08287658 |
| Cu | 5.11356929  | 7.36819042 | 4.08169531 |
| Cu | 3.83492653  | 2.20428957 | 6.15482535 |
| Cu | 2.55254657  | 4.42174797 | 6.17279082 |
| Cu | -2.55508181 | 8.84323232 | 6.18489973 |
| Cu | 5.11368549  | 4.42077843 | 6.15444682 |
| Cu | 1.28884028  | 6.62035130 | 6.18319749 |
| Cu | 6.37329462  | 2.19346641 | 6.16512338 |
| Cu | -1.27372086 | 2.21051907 | 6.26562150 |
| Cu | 3.83897536  | 6.62662320 | 6.15548236 |
| Cu | 6.38591325  | 6.63164513 | 6.18336963 |
| Cu | -1.27561506 | 6.65150611 | 6.17067172 |
| Cu | 2.55959721  | 8.83953761 | 6.18076313 |
| Cu | 5.11455851  | 8.83715536 | 6.18948217 |
| Cu | 0.00872595  | 4.41376725 | 6.28572100 |
| Cu | 0.00473161  | 8.84074413 | 6.17897926 |
| Cu | 7.67313609  | 4.41791712 | 6.25862177 |
| Cu | 1.29932409  | 2.19309383 | 6.16535537 |

Str 4

Free energy from VASP is -326.93793800 eV

|            |            |            |             |           |           |
|------------|------------|------------|-------------|-----------|-----------|
| PBC        | 10.223900  | 10.223900  | 20.000000   | 90.000000 | 90.000000 |
| 120.000000 |            |            |             |           |           |
| H          | 3.67593051 | 3.98598797 | 10.05385521 |           |           |



|    |             |            |             |
|----|-------------|------------|-------------|
| H  | 4.06451622  | 6.28191970 | 9.49936311  |
| H  | 6.58379424  | 5.80931708 | 11.13614677 |
| H  | 4.61150703  | 4.21877587 | 12.21868175 |
| H  | 7.22250813  | 3.65469385 | 10.23680423 |
| H  | 4.30936652  | 5.95580408 | 11.99776502 |
| H  | 6.64637499  | 4.55705056 | 8.83952168  |
| H  | 1.27930822  | 5.16620069 | 7.24101843  |
| H  | 5.15823289  | 6.85777858 | 8.52881628  |
| H  | 5.39478367  | 2.79584203 | 8.62880798  |
| C  | 5.82548151  | 5.13360007 | 10.73604912 |
| C  | 4.52788842  | 5.02546621 | 11.45760436 |
| C  | 6.29832396  | 4.10378451 | 9.80459468  |
| O  | 4.90243623  | 6.80932461 | 9.48527855  |
| O  | 3.41909715  | 4.77757984 | 10.58272815 |
| O  | 5.32141834  | 3.09348512 | 9.56802666  |
| Cu | 0.00000000  | 0.00000000 | 0.00000000  |
| Cu | 2.55597888  | 0.00000000 | 0.00000000  |
| Cu | 5.11195776  | 0.00000000 | 0.00000000  |
| Cu | 7.66793665  | 0.00000000 | 0.00000000  |
| Cu | 8.94591056  | 2.21354264 | 0.00000000  |
| Cu | 1.27798944  | 2.21354264 | 0.00000000  |
| Cu | 3.83396832  | 2.21354264 | 0.00000000  |
| Cu | 6.38994721  | 2.21354264 | 0.00000000  |
| Cu | -2.55597888 | 4.42708529 | 0.00000000  |
| Cu | 0.00000000  | 4.42708529 | 0.00000000  |
| Cu | 2.55597888  | 4.42708529 | 0.00000000  |
| Cu | 5.11195776  | 4.42708529 | 0.00000000  |
| Cu | 6.38993168  | 6.64062793 | 0.00000000  |
| Cu | -1.27798944 | 6.64062793 | 0.00000000  |
| Cu | 1.27798944  | 6.64062793 | 0.00000000  |
| Cu | 3.83396832  | 6.64062793 | 0.00000000  |
| Cu | -0.00000000 | 1.47569510 | 2.08694802  |
| Cu | 2.55597888  | 1.47569510 | 2.08694802  |
| Cu | 5.11195776  | 1.47569510 | 2.08694802  |
| Cu | 7.66793665  | 1.47569510 | 2.08694802  |
| Cu | -1.27798944 | 3.68923774 | 2.08694802  |
| Cu | 1.27798944  | 3.68923774 | 2.08694802  |
| Cu | 3.83396832  | 3.68923774 | 2.08694802  |
| Cu | 6.38994721  | 3.68923774 | 2.08694802  |
| Cu | -2.55597888 | 5.90278038 | 2.08694802  |
| Cu | 0.00000000  | 5.90278038 | 2.08694802  |
| Cu | 2.55597888  | 5.90278038 | 2.08694802  |
| Cu | 5.11195776  | 5.90278038 | 2.08694802  |
| Cu | -3.83396832 | 8.11632302 | 2.08694802  |

|    |             |            |            |
|----|-------------|------------|------------|
| Cu | -1.27798944 | 8.11632302 | 2.08694802 |
| Cu | 1.27798944  | 8.11632302 | 2.08694802 |
| Cu | 3.83396832  | 8.11632302 | 2.08694802 |
| Cu | 1.27798944  | 0.73784755 | 4.17389604 |
| Cu | 3.83396832  | 0.73784755 | 4.17389604 |
| Cu | 6.38994721  | 0.73784755 | 4.17389604 |
| Cu | 8.94592609  | 0.73784755 | 4.17389604 |
| Cu | 0.00000000  | 2.95139019 | 4.17389604 |
| Cu | 2.55597888  | 2.95139019 | 4.17389604 |
| Cu | 5.11195776  | 2.95139019 | 4.17389604 |
| Cu | 7.66793665  | 2.95139019 | 4.17389604 |
| Cu | -1.27798944 | 5.16493283 | 4.17389604 |
| Cu | 1.27798944  | 5.16493283 | 4.17389604 |
| Cu | 3.83396832  | 5.16493283 | 4.17389604 |
| Cu | 6.38994721  | 5.16493283 | 4.17389604 |
| Cu | -2.55597888 | 7.37847548 | 4.17389604 |
| Cu | 0.00000000  | 7.37847548 | 4.17389604 |
| Cu | 2.55597888  | 7.37847548 | 4.17389604 |
| Cu | 5.11195776  | 7.37847548 | 4.17389604 |
| Cu | -1.27757298 | 2.21677396 | 6.24798018 |
| Cu | 3.85537545  | 6.65304657 | 6.23726667 |
| Cu | 5.11368553  | 8.85110234 | 6.26835830 |
| Cu | 1.28042749  | 2.19287199 | 6.24241543 |
| Cu | 7.66657817  | 0.00194929 | 6.25091372 |
| Cu | -3.83121834 | 6.63802518 | 6.25426519 |
| Cu | 2.55515266  | 4.43078895 | 6.30050649 |
| Cu | 5.11646999  | 0.00276984 | 6.25440320 |
| Cu | -1.29491713 | 6.65142468 | 6.24386375 |
| Cu | 6.38962850  | 2.21515160 | 6.25815119 |
| Cu | 1.28009453  | 6.63821333 | 6.29879008 |
| Cu | 7.66770779  | 4.42461357 | 6.26261490 |
| Cu | 2.55939917  | 0.00151676 | 6.25971132 |
| Cu | 5.11438250  | 4.42318887 | 6.25582693 |
| Cu | 0.00365578  | 4.42955107 | 6.29971284 |
| Cu | 3.83999652  | 2.21904381 | 6.25493424 |

Str 5

Free energy from VASP is -328.14228800 eV

|            |            |            |            |           |           |
|------------|------------|------------|------------|-----------|-----------|
| PBC        | 10.223900  | 10.223900  | 20.000000  | 90.000000 | 90.000000 |
| 120.000000 |            |            |            |           |           |
| H          | 4.62509881 | 0.34002366 | 9.10968468 |           |           |
| H          | 5.96708112 | 0.99346867 | 8.76151844 |           |           |
| H          | 3.88596560 | 7.99729836 | 8.65962667 |           |           |

|    |             |             |             |
|----|-------------|-------------|-------------|
| H  | 2.59610873  | 5.23419346  | 9.03350500  |
| H  | 4.98122835  | 5.17059155  | 9.09131645  |
| H  | 2.50175966  | 6.61457762  | 10.16007755 |
| H  | 5.14742164  | 6.58200881  | 10.19256831 |
| H  | 1.06934053  | 7.64111425  | 8.81858687  |
| H  | -3.18771479 | 6.16821028  | 8.81601346  |
| H  | 1.27033473  | 3.69658800  | 7.22906109  |
| C  | 3.85521402  | 6.91008112  | 8.47028491  |
| C  | 2.58827411  | 6.33388947  | 9.09329444  |
| C  | 5.05914967  | 6.27282783  | 9.13313314  |
| O  | 5.56835502  | 0.33071100  | 9.36898684  |
| O  | 1.35730507  | 6.75561663  | 8.45829925  |
| O  | 6.29179593  | 6.70287927  | 8.47926226  |
| Cu | 0.00131675  | -0.00631136 | -0.00343018 |
| Cu | 2.55727590  | -0.00418161 | 0.00013694  |
| Cu | 5.10986926  | 0.00058301  | 0.00017630  |
| Cu | 7.66399152  | -0.00074911 | -0.00529097 |
| Cu | 8.94222705  | 2.21678250  | -0.01156311 |
| Cu | 1.27798108  | 2.21762492  | -0.00047550 |
| Cu | 3.83594278  | 2.21122692  | -0.00472789 |
| Cu | 6.38823538  | 2.21416761  | -0.01039540 |
| Cu | -2.55840522 | 4.43206758  | -0.01131651 |
| Cu | -0.00126779 | 4.42742981  | 0.00057837  |
| Cu | 2.55395356  | 4.42589578  | 0.00196874  |
| Cu | 5.11492801  | 4.43039433  | -0.01092355 |
| Cu | 6.38951673  | 6.64098653  | 0.01197542  |
| Cu | -1.28303241 | 6.64206219  | -0.00253299 |
| Cu | 1.27624679  | 6.64486499  | 0.00318377  |
| Cu | 3.83777656  | 6.64242748  | 0.00813240  |
| Cu | -0.00206185 | 1.47357402  | 2.05986565  |
| Cu | 2.55003587  | 1.47319582  | 2.06617908  |
| Cu | 5.10995378  | 1.47893270  | 2.07173291  |
| Cu | 7.66713866  | 1.47864981  | 2.06296022  |
| Cu | -1.28433481 | 3.69423503  | 2.06325003  |
| Cu | 1.27546710  | 3.70526354  | 2.08623637  |
| Cu | 3.83552228  | 3.70159131  | 2.07102224  |
| Cu | 6.38618567  | 3.70139586  | 2.07464460  |
| Cu | -2.55515897 | 5.90339475  | 2.09131783  |
| Cu | -0.00232692 | 5.90725217  | 2.08168195  |
| Cu | 2.55448603  | 5.90711222  | 2.09019349  |
| Cu | 5.10373683  | 5.90349327  | 2.09573203  |
| Cu | -3.84500527 | 8.12053340  | 2.10033667  |
| Cu | -1.27788401 | 8.10640533  | 2.09726743  |
| Cu | 1.28417381  | 8.11186987  | 2.08799611  |

|    |             |            |            |
|----|-------------|------------|------------|
| Cu | 3.82740455  | 8.10853149 | 2.09676866 |
| Cu | 1.26834314  | 0.77212409 | 4.17082010 |
| Cu | 3.82248209  | 0.74220288 | 4.12510769 |
| Cu | 6.38820405  | 0.74230434 | 4.13604334 |
| Cu | 8.94142181  | 0.73858324 | 4.12910706 |
| Cu | -0.00556103 | 2.95811329 | 4.12870582 |
| Cu | 2.55275899  | 2.96210392 | 4.12863045 |
| Cu | 5.10370444  | 2.96387310 | 4.13422523 |
| Cu | 7.65748255  | 2.96034690 | 4.12928167 |
| Cu | -1.26074776 | 5.15601116 | 4.16380439 |
| Cu | 1.27304804  | 5.19324524 | 4.18883204 |
| Cu | 3.80451825  | 5.18533391 | 4.21535211 |
| Cu | 6.37783680  | 5.19001811 | 4.16709471 |
| Cu | -2.58814609 | 7.37737488 | 4.17015289 |
| Cu | 0.01908255  | 7.37698957 | 4.17850957 |
| Cu | 2.56102111  | 7.36143085 | 4.22808132 |
| Cu | 5.09094403  | 7.36035909 | 4.20594841 |
| Cu | 6.38347068  | 2.22670525 | 6.22754359 |
| Cu | 8.92123654  | 2.21977417 | 6.20443426 |
| Cu | -0.00845966 | 0.04011790 | 6.19216900 |
| Cu | 3.84325708  | 2.20639436 | 6.20858225 |
| Cu | 7.65817404  | 0.05051350 | 6.19802456 |
| Cu | -1.28545882 | 6.64238265 | 6.19213286 |
| Cu | 5.09280664  | 0.03637284 | 6.19472112 |
| Cu | 7.67332179  | 4.41735575 | 6.20052588 |
| Cu | 3.83961766  | 6.64958712 | 6.43292641 |
| Cu | 2.56005612  | 0.02359455 | 6.20552486 |
| Cu | -0.01540183 | 4.40955422 | 6.27667771 |
| Cu | -3.82469830 | 6.64042470 | 6.30872459 |
| Cu | 5.10878275  | 4.40073880 | 6.20074551 |
| Cu | 1.25211597  | 6.67509869 | 6.34365649 |
| Cu | 2.54634765  | 4.39205164 | 6.25756673 |
| Cu | 1.27123131  | 2.22207077 | 6.29071472 |

Str 6

Free energy from VASP is -328.11066000 eV

|            |             |            |             |           |           |
|------------|-------------|------------|-------------|-----------|-----------|
| PBC        | 10.223900   | 10.223900  | 20.000000   | 90.000000 | 90.000000 |
| 120.000000 |             |            |             |           |           |
| H          | -2.07345270 | 8.20375820 | 8.69199961  |           |           |
| H          | -3.57537336 | 7.92828834 | 8.68693330  |           |           |
| H          | 3.03641587  | 5.17032736 | 9.27982242  |           |           |
| H          | 0.75080270  | 4.73369081 | 10.31761737 |           |           |
| H          | 2.50453965  | 3.02133743 | 10.31755628 |           |           |

|    |             |            |             |
|----|-------------|------------|-------------|
| H  | 0.71064929  | 6.01211896 | 9.06909143  |
| H  | 3.61604715  | 2.79506930 | 8.93222817  |
| H  | 0.05345948  | 3.27983478 | 8.62814844  |
| H  | 1.85157117  | 1.22932349 | 8.90959769  |
| H  | 2.51288714  | 5.64373659 | 7.48178230  |
| C  | 2.28315997  | 4.52245991 | 8.80789038  |
| C  | 0.89369875  | 4.94241137 | 9.23858601  |
| C  | 2.59101532  | 3.09016557 | 9.21160765  |
| O  | -2.89129674 | 8.42334123 | 9.19150062  |
| O  | -0.15588489 | 4.23878962 | 8.52255328  |
| O  | 1.61866732  | 2.17246487 | 8.65180888  |
| Cu | 0.00371059  | 0.02104433 | 19.98645617 |
| Cu | 2.55978352  | 0.02014226 | 19.98796465 |
| Cu | 5.11805698  | 0.02039945 | 19.97085119 |
| Cu | 7.67088411  | 0.02022887 | 19.97346835 |
| Cu | -1.27293873 | 2.23357115 | 19.97667034 |
| Cu | 1.28278296  | 2.23587839 | 0.00369692  |
| Cu | 3.83600749  | 2.23392819 | -0.01134287 |
| Cu | 6.39542005  | 2.23233536 | 19.96018383 |
| Cu | -2.54900543 | 4.44356285 | -0.02128855 |
| Cu | 0.00742053  | 4.44333997 | 0.00800237  |
| Cu | 2.55724176  | 4.44476108 | 0.01946918  |
| Cu | 5.11399964  | 4.44477903 | -0.00911519 |
| Cu | -3.83038214 | 6.65903951 | -0.00961457 |
| Cu | -1.27199510 | 6.65772569 | 19.98268953 |
| Cu | 1.28416154  | 6.65568516 | 20.00065972 |
| Cu | 3.83423916  | 6.65545426 | 19.99911747 |
| Cu | 0.00150643  | 1.50139602 | 2.07840448  |
| Cu | 2.55925300  | 1.50532834 | 2.08772630  |
| Cu | 5.12002405  | 1.49202682 | 2.04933085  |
| Cu | 7.67103818  | 1.49122663 | 2.04813478  |
| Cu | -1.26543598 | 3.70150931 | 2.08093278  |
| Cu | 1.28242368  | 3.70363445 | 2.11829846  |
| Cu | 3.82919484  | 3.70280078 | 2.09484713  |
| Cu | 6.39387638  | 3.70186060 | 2.05121117  |
| Cu | -2.54394495 | 5.90895929 | 2.05932203  |
| Cu | 0.01068773  | 5.91306938 | 2.08988416  |
| Cu | 2.55134545  | 5.91377717 | 2.10672562  |
| Cu | 5.10507558  | 5.91194511 | 2.07630602  |
| Cu | -3.83558349 | 8.13875413 | 2.06528364  |
| Cu | -1.26918196 | 8.13081868 | 2.05314975  |
| Cu | 1.28204886  | 8.13097516 | 2.06414895  |
| Cu | 3.83440746  | 8.12935396 | 2.06228872  |
| Cu | 1.27759408  | 0.76098284 | 4.15534451  |

|    |             |             |            |
|----|-------------|-------------|------------|
| Cu | 3.84345615  | 0.74507972  | 4.11760977 |
| Cu | 6.39447005  | 0.74689706  | 4.13129447 |
| Cu | 8.94581720  | 0.74106976  | 4.12550936 |
| Cu | 0.01611989  | 2.96464814  | 4.21499844 |
| Cu | 2.54906449  | 2.98609885  | 4.24474681 |
| Cu | 5.11887099  | 2.96196274  | 4.12840000 |
| Cu | 7.67063641  | 2.95960115  | 4.12982380 |
| Cu | -1.26122829 | 5.16279635  | 4.17140739 |
| Cu | 1.27651726  | 5.15966570  | 4.24329041 |
| Cu | 3.81206888  | 5.16413973  | 4.20359142 |
| Cu | 6.39091651  | 5.17303253  | 4.12189530 |
| Cu | -2.55570373 | 7.38115356  | 4.10479571 |
| Cu | 0.01488153  | 7.38060269  | 4.14924205 |
| Cu | 2.55814031  | 7.38165211  | 4.15820708 |
| Cu | 5.09863105  | 7.37617682  | 4.14279939 |
| Cu | 3.87895865  | 2.19419234  | 6.19090154 |
| Cu | -3.84232517 | 6.63809687  | 6.19836107 |
| Cu | 3.82080899  | 6.63878074  | 6.28893292 |
| Cu | 5.11793064  | -0.00327163 | 6.21989798 |
| Cu | 8.91748755  | 2.17754609  | 6.19177868 |
| Cu | 7.66585564  | 0.00485177  | 6.22065697 |
| Cu | -0.01201676 | -0.02231824 | 6.20284080 |
| Cu | 6.39495748  | 2.20603478  | 6.21610165 |
| Cu | 2.57186384  | -0.02216995 | 6.16308632 |
| Cu | 7.63722752  | 4.42536142  | 6.20360778 |
| Cu | 5.13537352  | 4.41478354  | 6.20951471 |
| Cu | -0.06110666 | 4.41827623  | 6.33505877 |
| Cu | 1.29621487  | 2.17461467  | 6.32486201 |
| Cu | -1.28445405 | 6.65957329  | 6.20030347 |
| Cu | 1.29340565  | 6.66829290  | 6.26821157 |
| Cu | 2.55262089  | 4.40042482  | 6.48434394 |

Str 7

Free energy from VASP is -329.56968300 eV

|            |            |            |             |           |           |
|------------|------------|------------|-------------|-----------|-----------|
| PBC        | 10.223900  | 10.223900  | 20.000000   | 90.000000 | 90.000000 |
| 120.000000 |            |            |             |           |           |
| H          | 6.25747729 | 2.12189376 | 8.49776367  |           |           |
| H          | 0.66700409 | 5.15485173 | 8.86149619  |           |           |
| H          | 6.23494419 | 1.74647777 | 10.22417389 |           |           |
| H          | 4.19774468 | 2.99963794 | 9.58108115  |           |           |
| H          | 8.48429008 | 2.48193202 | 9.44002223  |           |           |
| H          | 5.17573282 | 3.98403633 | 10.70108226 |           |           |
| H          | 7.83986771 | 3.54638426 | 10.72527046 |           |           |

|    |             |            |             |
|----|-------------|------------|-------------|
| H  | -0.12520029 | 6.46111332 | 8.81798965  |
| H  | -1.54797835 | 4.83587061 | 9.00836132  |
| H  | 6.05186917  | 4.97237590 | 8.72696502  |
| C  | 6.32591600  | 2.57943106 | 9.50731520  |
| C  | 5.15137545  | 3.53227952 | 9.69327951  |
| C  | 7.69483818  | 3.21476832 | 9.68245265  |
| O  | -0.05000860 | 5.63014387 | 9.33478302  |
| O  | 5.13643670  | 4.60299892 | 8.71246973  |
| O  | -2.41325618 | 4.37166364 | 8.81357812  |
| Cu | -5.11146824 | 8.85345592 | 19.99470598 |
| Cu | 2.55384040  | 0.00007768 | 19.99650122 |
| Cu | 5.11185002  | 0.00237968 | 19.99979659 |
| Cu | 7.66926840  | 0.00176614 | 19.99908633 |
| Cu | 8.94504204  | 2.21417733 | 0.00010223  |
| Cu | 1.27794870  | 2.21190502 | 19.99408096 |
| Cu | 3.83479246  | 2.21606654 | 0.00520495  |
| Cu | 6.38974416  | 2.21862320 | 0.01245909  |
| Cu | 7.66367195  | 4.42619973 | 0.01444242  |
| Cu | -0.00238439 | 4.42497060 | 19.99788380 |
| Cu | 2.55962429  | 4.42593989 | 0.00170530  |
| Cu | 5.11461431  | 4.42706238 | 0.02025891  |
| Cu | 6.38819382  | 6.63629069 | 0.01448649  |
| Cu | -1.28310754 | 6.63713461 | 0.00543438  |
| Cu | 1.27911500  | 6.63768833 | 0.00287734  |
| Cu | 3.83912655  | 6.63682209 | 0.00917289  |
| Cu | 0.00078265  | 1.47275644 | 2.07527069  |
| Cu | 2.55481741  | 1.47438659 | 2.07866645  |
| Cu | 5.11072043  | 1.48343453 | 2.09150777  |
| Cu | 7.66832404  | 1.48094448 | 2.08790271  |
| Cu | -1.28167917 | 3.68649701 | 2.08764252  |
| Cu | 1.27826055  | 3.68635513 | 2.06890656  |
| Cu | 3.83609747  | 3.68970568 | 2.10017108  |
| Cu | 6.38857422  | 3.69122251 | 2.12015992  |
| Cu | -2.56810062 | 5.89185073 | 2.11098742  |
| Cu | -0.00933725 | 5.89525530 | 2.07790959  |
| Cu | 2.56801983  | 5.89519760 | 2.08708897  |
| Cu | 5.11929909  | 5.89223898 | 2.12167260  |
| Cu | -3.83669964 | 8.11578293 | 2.07919611  |
| Cu | -1.28055675 | 8.11463235 | 2.06981804  |
| Cu | 1.27983844  | 8.11366225 | 2.06985129  |
| Cu | 3.83639227  | 8.11288412 | 2.07466567  |
| Cu | 1.27741025  | 0.73316420 | 4.16061144  |
| Cu | 3.83171935  | 0.72881634 | 4.15088514  |
| Cu | 6.38771006  | 0.72764276 | 4.14746429  |

|    |             |            |            |
|----|-------------|------------|------------|
| Cu | 8.94650538  | 0.72770755 | 4.14848249 |
| Cu | 0.00379575  | 2.94470901 | 4.14599017 |
| Cu | 2.54790464  | 2.94699975 | 4.15506510 |
| Cu | 5.10280410  | 2.95956234 | 4.20057833 |
| Cu | 7.67144782  | 2.95406519 | 4.18788359 |
| Cu | -1.29412755 | 5.15115344 | 4.18042822 |
| Cu | 1.27829299  | 5.16143493 | 4.13605071 |
| Cu | 3.84742075  | 5.14972162 | 4.21212254 |
| Cu | 6.38494184  | 5.13494219 | 4.26358761 |
| Cu | -2.56030734 | 7.37597747 | 4.14916895 |
| Cu | -0.00226404 | 7.37074811 | 4.13458061 |
| Cu | 2.55908658  | 7.36964350 | 4.14566278 |
| Cu | 5.11149958  | 7.37418071 | 4.16204972 |
| Cu | -1.26065593 | 2.18525810 | 6.21485019 |
| Cu | 0.01237644  | 4.41576700 | 6.20905601 |
| Cu | 3.80682663  | 2.18502115 | 6.22205479 |
| Cu | -2.53572084 | 4.39978689 | 6.36671014 |
| Cu | 2.52585927  | 4.41553289 | 6.23660549 |
| Cu | 3.82473201  | 6.64851370 | 6.23889449 |
| Cu | 5.07674249  | 4.40169845 | 6.41537159 |
| Cu | -0.00540087 | 8.83439037 | 6.23095010 |
| Cu | -3.83014654 | 6.65928741 | 6.22966147 |
| Cu | -1.27667510 | 6.64587552 | 6.21132072 |
| Cu | 5.11097849  | 8.84651772 | 6.24515945 |
| Cu | 1.27413935  | 6.63497366 | 6.21318186 |
| Cu | -2.55829939 | 8.84548176 | 6.24603999 |
| Cu | 2.55407145  | 8.84046758 | 6.22717588 |
| Cu | 6.38442212  | 2.17862385 | 6.20825519 |
| Cu | 1.27215608  | 2.20148085 | 6.24813154 |
